# Supplementary material for: Coordinative-to-covalent transformation, isomerization dynamics, and logic gate application of dithienylethene based photochromic cages
Source: PubMed Central journal article supplement — Chem Sci. 2020 Aug 6;11(33):8885–94. doi: 10.1039/d0sc03290e (PMC8163336; doi:10.1039/d0sc03290e), 2020-08-06
Supplement: SC-011-D0SC03290E-s001.pdf [file SC-011-D0SC03290E-s001.pdf]

|                                                                                                                                                                                                                                                                                                   |    |
|---------------------------------------------------------------------------------------------------------------------------------------------------------------------------------------------------------------------------------------------------------------------------------------------------|----|
| <b>1. General methods</b> .....                                                                                                                                                                                                                                                                   | 6  |
| <b>2. Syntheses and characterization</b> .....                                                                                                                                                                                                                                                    | 6  |
| <b>2.1 PADTE ligand</b> .....                                                                                                                                                                                                                                                                     | 6  |
| <b>Scheme S1.</b> Synthetic route for ligand PADTE. ....                                                                                                                                                                                                                                          | 7  |
| <b>Figure S1.</b> <sup>1</sup> H NMR spectrum for ligand PADTE (CDCl <sub>3</sub> , 25 °C). ....                                                                                                                                                                                                  | 7  |
| <b>Figure S2.</b> <sup>13</sup> C NMR spectrum for ligand PADTE (CDCl <sub>3</sub> , 25 °C). ....                                                                                                                                                                                                 | 8  |
| <b>Figure S3.</b> FT-IR spectrum for ligand PADTE.....                                                                                                                                                                                                                                            | 8  |
| <b>Figure S4.</b> Single-crystal structure of <i>o</i> -PADTE (CCDC 1917233, grey for C, blue for N, yellow for S, red for O, H atoms and solvents are omitted for clarity). ....                                                                                                                 | 9  |
| <b>2.2 <i>o</i>-A<sup>1</sup>L<sub>3</sub>Zn<sub>2</sub> cage</b> .....                                                                                                                                                                                                                           | 9  |
| <b>Figure S5.</b> <sup>1</sup> H NMR spectrum for <i>o</i> -A <sup>1</sup> L <sub>3</sub> Zn <sub>2</sub> cage (CD <sub>3</sub> CN, 25 °C). ....                                                                                                                                                  | 10 |
| <b>Figure S6.</b> <sup>13</sup> C NMR spectrum for <i>o</i> -A <sup>1</sup> L <sub>3</sub> Zn <sub>2</sub> cage (CD <sub>3</sub> CN, 25 °C). ....                                                                                                                                                 | 10 |
| <b>Figure S7.</b> FT-IR spectrum for <i>o</i> -A <sup>1</sup> L <sub>3</sub> Zn <sub>2</sub> cage.....                                                                                                                                                                                            | 11 |
| <b>Figure S8.</b> <sup>1</sup> H- <sup>1</sup> H COSY spectrum for <i>o</i> -A <sup>1</sup> L <sub>3</sub> Zn <sub>2</sub> cage (CD <sub>3</sub> CN, 25 °C). ..                                                                                                                                   | 11 |
| <b>Figure S9.</b> HSQC spectrum for <i>o</i> -A <sup>1</sup> L <sub>3</sub> Zn <sub>2</sub> cage (CD <sub>3</sub> CN, 25 °C). ....                                                                                                                                                                | 12 |
| <b>Figure S10.</b> High resolution ESI-MS spectrum for <i>o</i> -A <sup>1</sup> L <sub>3</sub> Zn <sub>2</sub> cage (CH <sub>3</sub> CN, 25 °C). ....                                                                                                                                             | 12 |
| <b>Figure S11.</b> DOSY spectrum for <i>o</i> -A <sup>1</sup> L <sub>3</sub> Zn <sub>2</sub> cage (CD <sub>3</sub> CN, 25 °C). ....                                                                                                                                                               | 13 |
| <b>Figure S12.</b> A pair of <i>ΔΔ</i> - and <i>ΔΔ</i> -enantiomeric cages coexist in the crystal lattice of <i>o</i> -A <sup>1</sup> L <sub>3</sub> Zn <sub>2</sub> cage (grey for C, blue for N, yellow for S, cyan for Zn, H atoms, solvents and counter anions are omitted for clarity). .... | 13 |
| <b>2.3 <i>o</i>-A<sup>2</sup>L<sub>3</sub>Cd<sub>2</sub> cage</b> .....                                                                                                                                                                                                                           | 14 |
| <b>Figure S13.</b> <sup>1</sup> H NMR spectrum for <i>o</i> -A <sup>2</sup> L <sub>3</sub> Cd <sub>2</sub> cage (CD <sub>3</sub> CN, 25 °C). ....                                                                                                                                                 | 14 |
| <b>Figure S14.</b> <sup>13</sup> C NMR spectrum for <i>o</i> -A <sup>2</sup> L <sub>3</sub> Cd <sub>2</sub> cage (CD <sub>3</sub> CN, 25 °C). ....                                                                                                                                                | 15 |
| <b>Figure S15.</b> FT-IR spectrum for <i>o</i> -A <sup>2</sup> L <sub>3</sub> Cd <sub>2</sub> cage.....                                                                                                                                                                                           | 15 |
| <b>Figure S16.</b> <sup>1</sup> H- <sup>1</sup> H COSY spectrum for <i>o</i> -A <sup>2</sup> L <sub>3</sub> Cd <sub>2</sub> cage (CD <sub>3</sub> CN, 25 °C). ..                                                                                                                                  | 16 |
| <b>Figure S17.</b> High resolution ESI-MS spectrum for <i>o</i> -A <sup>2</sup> L <sub>3</sub> Cd <sub>2</sub> cage (CH <sub>3</sub> CN, 25 °C). ....                                                                                                                                             | 17 |
| <b>Figure S18.</b> DOSY spectrum for <i>o</i> -A <sup>2</sup> L <sub>3</sub> Cd <sub>2</sub> cage (CD <sub>3</sub> CN, 25 °C). ....                                                                                                                                                               | 18 |
| <b>Figure S19.</b> (a) Single-crystal structure of <i>o</i> -A <sup>2</sup> L <sub>3</sub> Cd <sub>2</sub> cage. (b) Coordination geometry of Cd <sup>II</sup> (grey for C, blue for N, yellow for S, orange for Cd, H atoms, solvents and counter anions are omitted for clarity). ....          | 18 |
| <b>2.4 <i>o</i>-A<sup>2</sup>L<sub>3</sub>Zn<sub>2</sub> cage</b> .....                                                                                                                                                                                                                           | 19 |
| <b>Figure S20.</b> <sup>1</sup> H NMR spectrum for <i>o</i> -A <sup>2</sup> L <sub>3</sub> Zn <sub>2</sub> cage (CD <sub>3</sub> CN, 25 °C). ....                                                                                                                                                 | 19 |
| <b>Figure S21.</b> High resolution ESI-MS spectrum for <i>o</i> -A <sup>2</sup> L <sub>3</sub> Zn <sub>2</sub> cage (CH <sub>3</sub> CN, 25 °C). ....                                                                                                                                             | 20 |
| <b>Figure S22.</b> DOSY spectrum for <i>o</i> -A <sup>2</sup> L <sub>3</sub> Zn <sub>2</sub> cage (CD <sub>3</sub> CN, 25 °C). ....                                                                                                                                                               | 21 |
| <b>2.5 <i>o</i>-R-A<sup>1</sup>L<sub>3</sub> cage</b> .....                                                                                                                                                                                                                                       | 21 |
| <b>Figure S23.</b> <sup>1</sup> H NMR spectrum for <i>o</i> -R-A <sup>1</sup> L <sub>3</sub> cage (CD <sub>3</sub> OD, 25 °C). ....                                                                                                                                                               | 22 |
| <b>Figure S24.</b> <sup>13</sup> C NMR spectrum for <i>o</i> -R-A <sup>1</sup> L <sub>3</sub> cage (CD <sub>3</sub> OD, 25 °C). ....                                                                                                                                                              | 22 |
| <b>Figure S25.</b> FT-IR spectrum for <i>o</i> -R-A <sup>1</sup> L <sub>3</sub> cage.....                                                                                                                                                                                                         | 23 |

|                                                                                                                                                                                                                                                        |    |
|--------------------------------------------------------------------------------------------------------------------------------------------------------------------------------------------------------------------------------------------------------|----|
| <b>Figure S26.</b> $^1\text{H}$ - $^1\text{H}$ COSY spectrum (upper) and DOSY spectrum (lower) for <i>o</i> -R- $\text{A}^1_2\text{L}_3$ cage ( $\text{CD}_3\text{OD}$ , $25^\circ\text{C}$ ).....                                                     | 23 |
| <b>Figure S27.</b> High resolution ESI-MS spectrum for <i>o</i> -R- $\text{A}^1_2\text{L}_3$ cage ( $\text{CH}_3\text{OH}$ , $25^\circ\text{C}$ ). .....                                                                                               | 24 |
| <b>2.6 <i>o</i>-R-<math>\text{A}^2_2\text{L}_3</math> cage</b> .....                                                                                                                                                                                   | 25 |
| <b>Figure S29.</b> $^1\text{H}$ NMR spectrum for <i>o</i> -R- $\text{A}^2_2\text{L}_3$ cage ( $\text{CD}_3\text{OD}$ , $25^\circ\text{C}$ ). .....                                                                                                     | 25 |
| <b>Figure S30.</b> $^{13}\text{C}$ NMR spectrum for <i>o</i> -R- $\text{A}^2_2\text{L}_3$ cage ( $\text{CD}_3\text{OD}$ , $25^\circ\text{C}$ ).....                                                                                                    | 26 |
| <b>Figure S31.</b> FT-IR spectrum for <i>o</i> -R- $\text{A}^2_2\text{L}_3$ cage.....                                                                                                                                                                  | 26 |
| <b>Figure S32.</b> $^1\text{H}$ - $^1\text{H}$ COSY spectrum for <i>o</i> -R- $\text{A}^2_2\text{L}_3$ cage ( $\text{CD}_3\text{OD}$ , $25^\circ\text{C}$ )..                                                                                          | 27 |
| <b>Figure S33.</b> High resolution ESI-MS spectrum for <i>o</i> -R- $\text{A}^2_2\text{L}_3$ cage ( $\text{CH}_3\text{OH}$ , $25^\circ\text{C}$ ). .....                                                                                               | 27 |
| <b>Figure S34.</b> DOSY spectrum for <i>o</i> -R- $\text{A}^2_2\text{L}_3$ cage ( $\text{CD}_3\text{OD}$ , $25^\circ\text{C}$ ). .....                                                                                                                 | 28 |
| <b>Table S1.</b> Crystallographic data summary for <i>o</i> -PADTE (CCDC 1917233), <i>c</i> -PADTE (CCDC 1919654). .....                                                                                                                               | 29 |
| <b>Table S2.</b> Bond lengths ( $\text{\AA}$ ) for PADTE ( <b>L</b> ).....                                                                                                                                                                             | 30 |
| <b>Table S3.</b> Bond angles ( $^\circ$ ) for PADTE ( <b>L</b> ).....                                                                                                                                                                                  | 31 |
| <b>Table S4.</b> Crystallographic data summary for <i>o</i> - $\text{A}^1_2\text{L}_3\text{Zn}_2$ cage, CCDC 1917232), <i>c</i> - $\text{A}^1_2\text{L}_3\text{Zn}_2$ cage, CCDC 1917235). .....                                                       | 32 |
| <b>Table S5.</b> Selected bond lengths ( $\text{\AA}$ ) for $\text{A}^1_2\text{L}_3\text{Zn}_2$ cage.....                                                                                                                                              | 33 |
| <b>Table S6.</b> Selected bond angles ( $^\circ$ ) for $\text{A}^1_2\text{L}_3\text{Zn}_2$ cage.....                                                                                                                                                   | 34 |
| <b>Table S7.</b> Crystallographic data summary for <i>o</i> - $\text{A}^2_2\text{L}_3\text{Cd}_2$ cage, CCDC 1917234 and <i>c</i> - $\text{A}^2_2\text{L}_3\text{Cd}_2$ cage, CCDC 1917798. ....                                                       | 35 |
| <b>Table S8.</b> Selected bond lengths ( $\text{\AA}$ ) for $\text{A}^2_2\text{L}_3\text{Cd}_2$ cage.....                                                                                                                                              | 36 |
| <b>Table S9.</b> Selected bond angles ( $^\circ$ ) for $\text{A}^2_2\text{L}_3\text{Cd}_2$ cage. ....                                                                                                                                                  | 37 |
| <b>Table S11.</b> Crystallographic data summary for <i>o</i> -R- $\text{A}^1_2\text{L}_3$ (CCDC 1922928). .....                                                                                                                                        | 39 |
| <b>Table S12.</b> Bond lengths ( $\text{\AA}$ ) for <i>o</i> -R- $\text{A}^1_2\text{L}_3$ . .....                                                                                                                                                      | 40 |
| <b>Table S13.</b> Bond angles ( $^\circ$ ) for <i>o</i> -R- $\text{A}^1_2\text{L}_3$ . .....                                                                                                                                                           | 41 |
| <b>2.7 Er-1, Er-5, Er-9</b> .....                                                                                                                                                                                                                      | 43 |
| <b>3. Study of photochromic process of PADTE ligand and cages</b> .....                                                                                                                                                                                | 43 |
| <b>3.1 PADTE ligand</b> .....                                                                                                                                                                                                                          | 43 |
| <b>Figure S35.</b> Color change of PADTE ligand in $\text{CH}_3\text{CN}/\text{CHCl}_3$ (v:v = 1:1, $1 \times 10^{-5} \text{ mol L}^{-1}$ ) solution by UV/Vis irradiation. ....                                                                       | 43 |
| <b>Figure S36.</b> $^1\text{H}$ NMR comparison of <i>o</i> - and <i>c</i> -PADTE ligand ( $\text{CDCl}_3$ , $25^\circ\text{C}$ ). .....                                                                                                                | 44 |
| <b>Figure S37.</b> UV-Vis spectra of <i>o</i> -PADTE ligand during ring-closing process under UV irradiation for different time ( $\text{CH}_3\text{CN}/\text{CHCl}_3$ , v:v=1:1, $1 \times 10^{-5} \text{ mol L}^{-1}$ , room temperature). ....      | 44 |
| <b>Figure S38.</b> UV-Vis spectra of <i>c</i> -PADTE ligand during ring-opening process under visible irradiation for different time ( $\text{CH}_3\text{CN}/\text{CHCl}_3$ , v:v=1:1, $1 \times 10^{-5} \text{ mol L}^{-1}$ , room temperature). .... | 45 |
| <b>Figure S39.</b> (a) Plot of $\ln[(A_0 - A_\infty)/(A_t - A_\infty)]$ with time for UV-Vis absorption of <i>o</i> -PADTE ligand during ring-closing process, and (b) <i>c</i> -                                                                      |    |

|                                                                                                                                                                                                                                                                                                                                                                                                                                                                                     |    |
|-------------------------------------------------------------------------------------------------------------------------------------------------------------------------------------------------------------------------------------------------------------------------------------------------------------------------------------------------------------------------------------------------------------------------------------------------------------------------------------|----|
| PADTE ligand during ring-opening process (CH <sub>3</sub> CN/CHCl <sub>3</sub> , v:v = 1:1, 1×10 <sup>-5</sup> mol L <sup>-1</sup> , room temperature).....                                                                                                                                                                                                                                                                                                                         | 45 |
| <b>Figure S40.</b> Cycled signals for absorbance at 605 nm of PADTE during alternative ring-closing/ring-opening processes .....                                                                                                                                                                                                                                                                                                                                                    | 46 |
| <b>Figure S41.</b> Emission spectra of <i>o</i> -PADTE ligand during ring-closing process (CH <sub>3</sub> CN/CHCl <sub>3</sub> , v:v = 1:1, 1×10 <sup>-5</sup> mol L <sup>-1</sup> , room temperature)....                                                                                                                                                                                                                                                                         | 46 |
| <b>3.2 A<sup>1</sup><sub>2</sub>L<sub>3</sub>Zn<sub>2</sub> cage</b> .....                                                                                                                                                                                                                                                                                                                                                                                                          | 47 |
| <b>Figure S42.</b> (a) Plot of ln[(A <sub>0</sub> -A <sub>∞</sub> )/(A <sub>t</sub> -A <sub>∞</sub> )] with time for UV-Vis absorption of <i>o</i> -A <sup>1</sup> <sub>2</sub> L <sub>3</sub> Zn <sub>2</sub> cage during ring-closing process, and (b) <i>c</i> -A <sup>1</sup> <sub>2</sub> L <sub>3</sub> Zn <sub>2</sub> cage during ring-opening process (CH <sub>3</sub> CN/CHCl <sub>3</sub> , v:v = 1:1, 1×10 <sup>-5</sup> mol L <sup>-1</sup> , room temperature). ..... | 47 |
| <b>Figure S43.</b> The emission spectra of <i>o</i> -A <sup>1</sup> <sub>2</sub> L <sub>3</sub> Zn <sub>2</sub> cage during ring-closing process (CH <sub>3</sub> CN/CHCl <sub>3</sub> , v:v = 1:1, 1×10 <sup>-5</sup> mol L <sup>-1</sup> , room temperature). ....                                                                                                                                                                                                                | 47 |
| <b>Figure S44.</b> High resolution ESI-MS spectra of <i>c</i> -A <sup>1</sup> <sub>2</sub> L <sub>3</sub> Zn <sub>2</sub> cage (CH <sub>3</sub> CN, room temperature).....                                                                                                                                                                                                                                                                                                          | 48 |
| <b>Figure S45.</b> (a) DOSY and (b) its partial enlargement spectra of <i>c</i> -A <sup>1</sup> <sub>2</sub> L <sub>3</sub> Zn <sub>2</sub> cage (CD <sub>3</sub> CN, room temperature).....                                                                                                                                                                                                                                                                                        | 49 |
| <b>Figure S46.</b> (a) Single-crystal structure of <i>c</i> -A <sup>1</sup> <sub>2</sub> L <sub>3</sub> Zn <sub>2</sub> cage. (b) NMR spectra for the crystallized sample of <i>c</i> -A <sup>1</sup> <sub>2</sub> L <sub>3</sub> Zn <sub>2</sub> cage, and the solution sample of <i>o</i> -A <sup>1</sup> <sub>2</sub> L <sub>3</sub> Zn <sub>2</sub> cage before and after UV irradiation for 3 hours. ....                                                                      | 50 |
| <b>3.3 A<sup>2</sup><sub>2</sub>L<sub>3</sub>Cd<sub>2</sub> cage</b> .....                                                                                                                                                                                                                                                                                                                                                                                                          | 51 |
| <b>Figure S47.</b> <sup>1</sup> H NMR spectra evolution of <i>o</i> -A <sup>2</sup> <sub>2</sub> L <sub>3</sub> Cd <sub>2</sub> cage under UV irradiation for different time (400 MHz, CD <sub>3</sub> CN, 298 K). .....                                                                                                                                                                                                                                                            | 51 |
| <b>Figure S48.</b> UV-Vis spectra of <i>o</i> -A <sup>2</sup> <sub>2</sub> L <sub>3</sub> Cd <sub>2</sub> cage during ring-closing process (CH <sub>3</sub> CN/CHCl <sub>3</sub> , v:v = 1:1, 1×10 <sup>-5</sup> mol L <sup>-1</sup> , room temperature). ....                                                                                                                                                                                                                      | 51 |
| <b>Figure S49.</b> UV-Vis spectra of <i>c</i> -A <sup>2</sup> <sub>2</sub> L <sub>3</sub> Cd <sub>2</sub> cage during ring-opening process (CH <sub>3</sub> CN/CHCl <sub>3</sub> , v:v = 1:1, 1×10 <sup>-5</sup> mol L <sup>-1</sup> , room temperature). ....                                                                                                                                                                                                                      | 52 |
| <b>Figure S50.</b> (a) Plot of ln[(A <sub>0</sub> -A <sub>∞</sub> )/(A <sub>t</sub> -A <sub>∞</sub> )] with time for UV-Vis absorption of <i>o</i> -A <sup>2</sup> <sub>2</sub> L <sub>3</sub> Cd <sub>2</sub> cage during ring-closing process, and (b) <i>c</i> -A <sup>2</sup> <sub>2</sub> L <sub>3</sub> Cd <sub>2</sub> cage during ring-opening process (CH <sub>3</sub> CN/CHCl <sub>3</sub> , v:v = 1:1, 1×10 <sup>-5</sup> mol L <sup>-1</sup> , room temperature). ..... | 52 |
| <b>Figure S51.</b> Cycled signals for absorbance at 627 nm of A <sup>2</sup> <sub>2</sub> L <sub>3</sub> Cd <sub>2</sub> cage during alternative ring-closing/ring-opening processes. ....                                                                                                                                                                                                                                                                                          | 53 |
| <b>Figure S52.</b> High resolution ESI-MS spectra of <i>c</i> -A <sup>2</sup> <sub>2</sub> L <sub>3</sub> Cd <sub>2</sub> cage (CH <sub>3</sub> CN, room temperature).....                                                                                                                                                                                                                                                                                                          | 54 |
| <b>Figure S53.</b> DOSY spectra of <i>c</i> -A <sup>2</sup> <sub>2</sub> L <sub>3</sub> Cd <sub>2</sub> cage (CD <sub>3</sub> CN, room temperature).....                                                                                                                                                                                                                                                                                                                            | 55 |
| <b>Figure S54.</b> Single-crystal structure of <i>c</i> -A <sup>2</sup> <sub>2</sub> L <sub>3</sub> Cd <sub>2</sub> cage (grey for C, blue for N, yellow for S, orange for Cd, H atoms, solvents and counter anions are omitted for clarity). .....                                                                                                                                                                                                                                 | 55 |
| <b>3.4 A<sup>2</sup><sub>2</sub>L<sub>3</sub>Zn<sub>2</sub> cage</b> .....                                                                                                                                                                                                                                                                                                                                                                                                          | 56 |
| <b>Figure S55.</b> <sup>1</sup> H NMR spectra evolution of <i>o</i> -A <sup>2</sup> <sub>2</sub> L <sub>3</sub> Zn <sub>2</sub> cage under UV irradiation for different time (400 MHz, CD <sub>3</sub> CN, 298 K). .....                                                                                                                                                                                                                                                            | 56 |

|                                                                                                                                                                                                                                                                                                                                                                                                                                                           |    |
|-----------------------------------------------------------------------------------------------------------------------------------------------------------------------------------------------------------------------------------------------------------------------------------------------------------------------------------------------------------------------------------------------------------------------------------------------------------|----|
| <b>Figure S56.</b> UV-Vis spectra of <i>o</i> -A <sup>2</sup> L <sub>3</sub> Zn <sub>2</sub> cage during ring-closing process (CH <sub>3</sub> CN/CHCl <sub>3</sub> , v:v = 1:1, 1×10 <sup>-5</sup> mol L <sup>-1</sup> , room temperature). .....                                                                                                                                                                                                        | 56 |
| <b>Figure S57.</b> UV-Vis spectra of <i>c</i> -A <sup>2</sup> L <sub>3</sub> Zn <sub>2</sub> cage during ring-opening process (CH <sub>3</sub> CN/CHCl <sub>3</sub> , v:v=1:1, 1×10 <sup>-5</sup> mol L <sup>-1</sup> , room temperature). .....                                                                                                                                                                                                          | 57 |
| <b>Figure S58.</b> (a) Plot of ln[(A <sub>0</sub> -A <sub>∞</sub> )/(A <sub>t</sub> -A <sub>∞</sub> )] with time for UV-Vis absorption of <i>o</i> -A <sup>2</sup> L <sub>3</sub> Zn <sub>2</sub> cage during ring-closing process, and (b) <i>c</i> -A <sup>2</sup> L <sub>3</sub> Zn <sub>2</sub> cage during ring-opening process (CH <sub>3</sub> CN/CHCl <sub>3</sub> , v:v = 1:1, 1×10 <sup>-5</sup> mol L <sup>-1</sup> , room temperature). ..... | 57 |
| <b>Figure S59.</b> Cycled signals for absorbance at 627 nm of A <sup>2</sup> L <sub>3</sub> Zn <sub>2</sub> during alternative ring-closing/ring-opening processes. ....                                                                                                                                                                                                                                                                                  | 58 |
| <b>Figure S60.</b> High resolution ESI-MS spectra of <i>c</i> -A <sup>2</sup> L <sub>3</sub> Zn <sub>2</sub> cage (CH <sub>3</sub> CN, room temperature). ....                                                                                                                                                                                                                                                                                            | 58 |
| <b>Figure S61.</b> DOSY spectra of <i>c</i> -A <sup>2</sup> L <sub>3</sub> Zn <sub>2</sub> cage (CD <sub>3</sub> CN, room temperature). ....                                                                                                                                                                                                                                                                                                              | 59 |
| <b>3.5 R-A<sup>1</sup>L<sub>3</sub> cage</b> .....                                                                                                                                                                                                                                                                                                                                                                                                        | 59 |
| <b>Figure S62.</b> (a) Plot of ln[(A <sub>0</sub> -A <sub>∞</sub> )/(A <sub>t</sub> -A <sub>∞</sub> )] with time for UV-Vis absorption of <i>o</i> -R-A <sup>1</sup> L <sub>3</sub> cage during ring-closing process, and (b) <i>c</i> -R-A <sup>1</sup> L <sub>3</sub> cage during ring-opening process (CH <sub>3</sub> CN/CHCl <sub>3</sub> , v:v = 1:1, 1×10 <sup>-5</sup> mol L <sup>-1</sup> , room temperature). ....                              | 59 |
| <b>Figure S63.</b> High resolution ESI-MS spectra of <i>c</i> -R-A <sup>1</sup> L <sub>3</sub> cage (CH <sub>3</sub> OH, room temperature). ....                                                                                                                                                                                                                                                                                                          | 60 |
| <b>Figure S64.</b> DOSY spectra of <i>c</i> -R-A <sup>1</sup> L <sub>3</sub> cage (CD <sub>3</sub> OD, room temperature). ....                                                                                                                                                                                                                                                                                                                            | 60 |
| <b>Figure S65.</b> The emission spectra of <i>o</i> -R-A <sup>1</sup> L <sub>3</sub> cage during ring-closing process (CH <sub>3</sub> CN/CHCl <sub>3</sub> , v:v = 1:1, 1×10 <sup>-5</sup> mol L <sup>-1</sup> , room temperature). ....                                                                                                                                                                                                                 | 61 |
| <b>3.6 R-A<sup>2</sup>L<sub>3</sub> cage</b> .....                                                                                                                                                                                                                                                                                                                                                                                                        | 61 |
| <b>Figure S66.</b> <sup>1</sup> H NMR spectra evolution of <i>o</i> -R-A <sup>2</sup> L <sub>3</sub> cage under UV irradiation for different time (400 MHz, CD <sub>3</sub> OD, 298 K). ....                                                                                                                                                                                                                                                              | 61 |
| <b>Figure S67.</b> UV-Vis spectra of <i>o</i> -R-A <sup>2</sup> L <sub>3</sub> cage during ring-closing process (CH <sub>3</sub> CN/CHCl <sub>3</sub> , v:v = 1:1, 1×10 <sup>-5</sup> mol L <sup>-1</sup> , room temperature). ....                                                                                                                                                                                                                       | 62 |
| <b>Figure S68.</b> UV-Vis spectra of <i>c</i> -R-A <sup>2</sup> L <sub>3</sub> cage during ring-opening process (CH <sub>3</sub> CN/CHCl <sub>3</sub> , v:v = 1:1, 1×10 <sup>-5</sup> mol L <sup>-1</sup> , room temperature). ....                                                                                                                                                                                                                       | 62 |
| <b>Figure S69.</b> (a) Plot of ln[(A <sub>0</sub> -A <sub>∞</sub> )/(A <sub>t</sub> -A <sub>∞</sub> )] with time for UV-Vis absorption of <i>o</i> -R-A <sup>2</sup> L <sub>3</sub> cage during ring-closing process, and (b) <i>c</i> -R-A <sup>2</sup> L <sub>3</sub> cage during ring-opening process (CH <sub>3</sub> CN/CHCl <sub>3</sub> , v:v = 1:1, 1×10 <sup>-5</sup> mol L <sup>-1</sup> , room temperature). ....                              | 63 |
| <b>Figure S70.</b> Cycled signals for absorbance at 538 nm of R-A <sup>2</sup> L <sub>3</sub> cage during alternative ring-closing/ring-opening processes. ....                                                                                                                                                                                                                                                                                           | 63 |
| <b>Figure S71.</b> High resolution ESI-MS spectra of <i>c</i> -R-A <sup>2</sup> L <sub>3</sub> cage (CH <sub>3</sub> OH, room temperature). ....                                                                                                                                                                                                                                                                                                          | 64 |
| <b>Figure S72.</b> DOSY spectra of <i>c</i> -R-A <sup>2</sup> L <sub>3</sub> cage (CD <sub>3</sub> OD, room temperature). ....                                                                                                                                                                                                                                                                                                                            | 64 |
| <b>3.7 Guest effects</b> .....                                                                                                                                                                                                                                                                                                                                                                                                                            | 61 |

|                                                                                                                                                                                                                                                                                                              |    |
|--------------------------------------------------------------------------------------------------------------------------------------------------------------------------------------------------------------------------------------------------------------------------------------------------------------|----|
| <b>Figure S73.</b> UV-Vis spectra (left) and solution color (right) after adding different amounts of $\text{H}_2\text{PO}_4^-$ anions into $o\text{-R-A}^1_2\text{L}_3$ solution ( $\text{CH}_2\text{Cl}_2$ , $1 \times 10^{-5}$ mol $\text{L}^{-1}$ ), and then irradiated under UV light for 90 min. .... | 65 |
| <b>Figure S74.</b> UV-Vis spectra (left) and solution color (right) after adding different amounts of $\text{HSO}_4^-$ anions into $o\text{-R-A}^1_2\text{L}_3$ solution ( $\text{CH}_2\text{Cl}_2$ , $1 \times 10^{-5}$ mol $\text{L}^{-1}$ ), and then irradiated under UV light for 90 min. ....          | 65 |
| <b>Figure S75.</b> $^1\text{H}$ NMR titration spectra of $\text{H}_2\text{PO}_4^-$ into $o\text{-R-A}^1_2\text{L}_3$ solution ( $\text{CD}_3\text{OD}$ , $25^\circ\text{C}$ ). ....                                                                                                                          | 66 |
| <b>Figure S76.</b> $^1\text{H}$ NMR titration spectra of $\text{HSO}_4^-$ into $o\text{-R-A}^1_2\text{L}_3$ solution ( $\text{CD}_3\text{OD}$ , $25^\circ\text{C}$ ). ....                                                                                                                                   | 66 |
| <b>4. Up-conversion color tuning applications</b> .....                                                                                                                                                                                                                                                      | 67 |
| <b>Figure S77.</b> The UV-Vis spectra of $c\text{-PADTE}$ and $c\text{-cages}$ .....                                                                                                                                                                                                                         | 67 |
| <b>Figure S78.</b> The upconversion luminescence spectra of three kinds of upconversion materials (Er-1, Er-5, Er-9) and their hybrid materials with $c\text{-R-A}^1_2\text{L}_3$ cage.....                                                                                                                  | 67 |
| <b>Figure S79.</b> The upconversion emission spectra of nine kinds of hybrid materials.....                                                                                                                                                                                                                  | 68 |
| <b>Figure S80.</b> The upconversion emission spectra of Er-1 and its hybrid materials ( $\text{Er-1} + o/c\text{-R-A}^1_2\text{L}_3$ ). ....                                                                                                                                                                 | 68 |
| <b>Figure S81.</b> Cycled signals for upconversion PL intensity at 544 nm of 0.11% $\text{R-A}^1_2\text{L}_3 @ \text{Er-1}$ hybrid solid state materials during alternative ring-closing/ring-opening processes.....                                                                                         | 69 |
| REFERENCES .....                                                                                                                                                                                                                                                                                             | 70 |

## 1. General methods

Unless otherwise stated, all commercial reagents and solvents were used as commercially purchased without additional purification. The  $^1\text{H}$  NMR,  $^{13}\text{C}$  NMR,  $^1\text{H}$ - $^1\text{H}$  COSY, DOSY, HSQC spectra were recorded on Bruker AVANCE III 400 (400 MHz). IR spectra were measured on a Nicolet/Nexus-670 FT-IR spectrometer with KBr pellets in the range 4000–400  $\text{cm}^{-1}$ . HR-ESI-MS spectra were tested on Bruker Maxis 4G and data analyses were processed on Bruker Data Analysis software. UV-vis absorption spectra were measured using a Shimadzu/UV-250PC spectrophotometer. Photoluminescence spectra were measured on an EDINBURGH FLS980 fluorescence spectrophotometer. Ring closing and opening experiments for the ligand and cages were carried out using standard hand-held UV lamp irradiation (365 nm), and 150 W halogen source (Philips 13629 EKE), which was passed through a Y48 (> 455 nm) cutoff filter to eliminate higher energy light, respectively.

Single-crystal diffraction data for *o*-PADTE (CCDC 1917233), *c*-PADTE (CCDC 1919654), *o*- $\text{A}^1_2\text{L}_3\text{Zn}_2$  cage (CCDC 1917232), *c*- $\text{A}^1_2\text{L}_3\text{Zn}_2$  cage (CCDC 1917235), *o*- $\text{A}^2_2\text{L}_3\text{Cd}_2$  cage (CCDC 1917234), *c*- $\text{A}^2_2\text{L}_3\text{Cd}_2$  cage (CCDC 1917798), and *o*- $\text{R-A}^1_2\text{L}_3$  cage (CCDC 1922928) were collected on an Agilent Gemini S Ultra diffractometer with the Enhanced X-ray Source of Cu-K $\alpha$  radiation ( $\lambda = 1.54178 \text{ \AA}$ ). Empirical absorption correction was applied using spherical harmonics implemented in SCALE3 ABSPACK scaling algorithm. Structural solution and refinement against  $F^2$  were carried out using the SHELXL programs. All the non-hydrogen atoms were refined with anisotropic parameters. Crystallographic data and structural refinement information, selected bond lengths and angles are listed in Tables S1-12.

## 2. Syntheses and characterization

### 2.1 PADTE ligand

The ligand PADTE was synthesized according to a modified method in literature,<sup>[S1]</sup> with the procedure as shown in Scheme S1. The hexane solution of *n*BuLi (3.1 mL, 1.6  $\text{mmol L}^{-1}$ ) was added dropwise at 0 °C under  $\text{N}_2$  atmosphere to a solution of 1,2-bis(5-chloro-2-methylthiophen-3-yl)cyclopent-1-ene (0.98 g, 3 mmol) in anhydrous THF (45 mL). After 20 min, 2.4 mL of tributyl borate was added and heated to room temperature. After stirring for 1 h, the resulting reddish solution was used directly for the following procedure. To 50 mL of  $\text{N}_2$ -degassed DMSO, 15 mL water solution of  $\text{Na}_2\text{CO}_3$  (2  $\text{mol L}^{-1}$ ) and 1.5 mL ethylene glycol in a Schlenk system, 5-bromopicolinaldehyde (7 mmol) and  $\text{Pd}(\text{PPh}_3)_4$  (100 mg) were added under the protection of  $\text{N}_2$ . After that, the reddish THF solution prepared in the above procedure was added into the mixture and reacted at 90 °C for 24 h in dark. Upon reaction completion, 50 mL of toluene and 20 mL water was added, and the extracted organic phase was washed successively with water and brine. Flash column chromatography on silica gel (ethyl acetate/petroleum ether, 1/3) of the concentrated and  $\text{MgSO}_4$ -dried residue afforded 500 mg of

PADTE ligand. Yield, 20%. For single crystal suitable for X-ray diffraction, 4 mg powder product of the PADTE was dissolved in  $\text{CHCl}_3$  and natural evaporation under room temperature for five days led to block yellow single crystals.  $^1\text{H}$  NMR data (400 MHz,  $\text{CDCl}_3$ ):  $\delta$  10.02 (s, 2H), 8.88 (s, 2H), 7.90 (m, 4H), 7.22 (s, 2H), 2.88 (t,  $J = 7.4$  Hz, 4H), 2.15 (m, 2H), 2.08 (s, 6H).  $^{13}\text{C}$  NMR data (100 MHz,  $\text{CDCl}_3$ ):  $\delta$  192.61, 150.89, 146.41, 138.19, 137.44, 134.94, 134.83, 134.18, 132.50, 126.90, 122.05, 99.98. IR (KBr pellets,  $\text{cm}^{-1}$ ): 2946, 2840, 1700, 1578, 1490, 1452, 1370, 1298, 1204, 1122, 1024, 948, 832, 710, 614, 470.

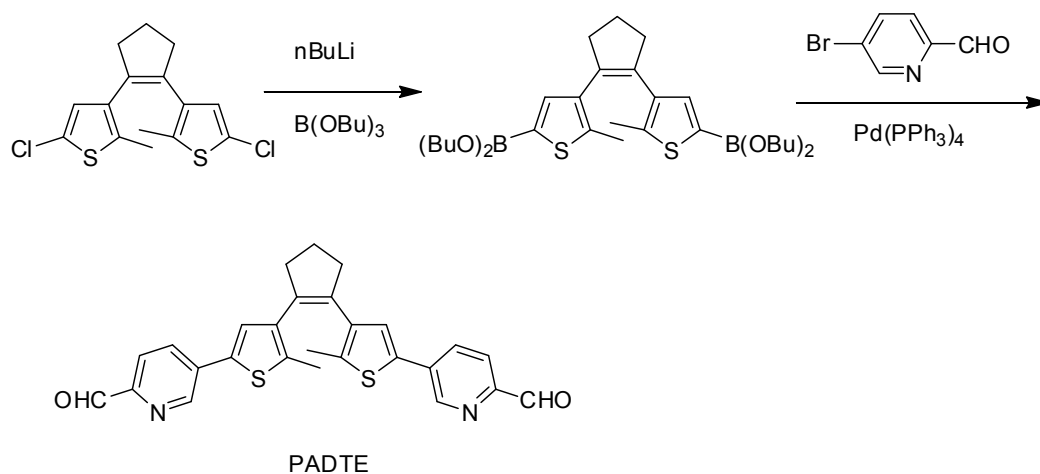

**Scheme S1.** Synthetic route for ligand PADTE.

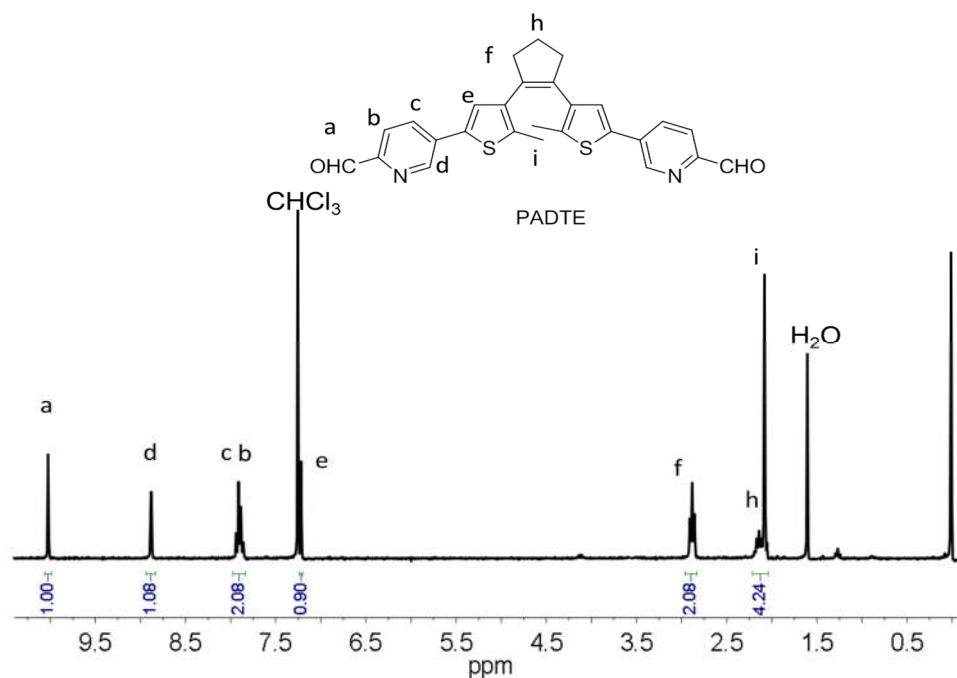

**Figure S1.**  $^1\text{H}$  NMR spectrum for ligand PADTE ( $\text{CDCl}_3$ ,  $25^\circ\text{C}$ ).

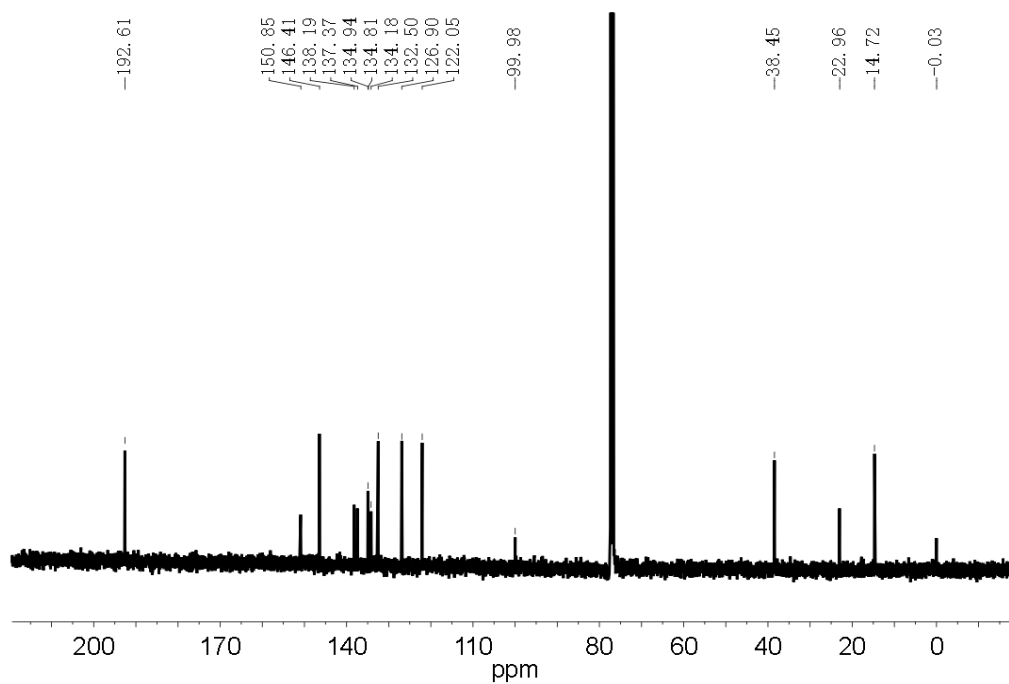

Figure S2.  $^{13}\text{C}$  NMR spectrum for ligand PADTE ( $\text{CDCl}_3$ ,  $25^\circ\text{C}$ ).

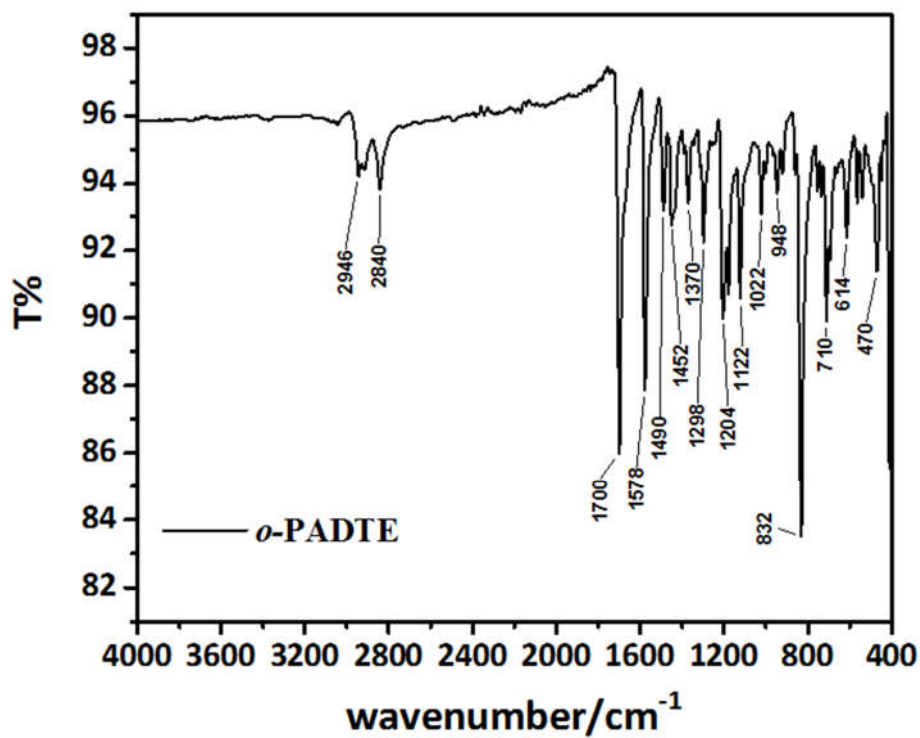

Figure S3. FT-IR spectrum for ligand PADTE.



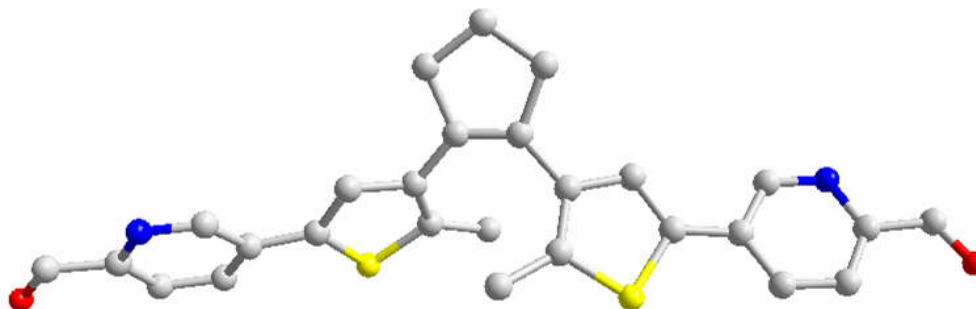

**Figure S4.** Single-crystal structure of *o*-PADTE (CCDC 1917233, grey for C, blue for N, yellow for S, red for O, H atoms and solvents are omitted for clarity).

## 2.2 *o*-A<sup>1</sup><sub>2</sub>L<sub>3</sub>Zn<sub>2</sub> cage

PADTE (4.7 mg, 0.01 mmol, 3 equiv) and zinc triflate (2.4 mg, 2 equiv) was added into 0.5 mL CH<sub>3</sub>CN and stirred for 10 minutes. Addition of tris(2-aminoethyl)amine (1 μL, 0.0067 mmol, 2 equiv) resulted in large quantity of precipitates. Further addition of 1 mL CHCl<sub>3</sub> and heating at 50 °C for 12 hours led to clear yellow solution. Yellow crude product of *o*-A<sup>1</sup><sub>2</sub>L<sub>3</sub>Zn<sub>2</sub> cage was obtained by rotary evaporation of the solvent, which was washed with CHCl<sub>3</sub> and water successively and then dissolved again in CH<sub>3</sub>CN. 5 mg pure powder product of the cage was obtained by evaporation of the filtrate, yield 65%. For single crystal suitable for X-ray diffraction, 2 mg powder product of the cage was dissolved in CH<sub>3</sub>CN, and natural evaporation under room temperature for three days led to block yellowish green single crystals. High resolution ESI-MS (*m/z*) data: calc. (measured): 1012.1696 (1012.1769) for [A<sup>1</sup><sub>2</sub>L<sub>3</sub>Zn<sub>2</sub> + 2CF<sub>3</sub>SO<sub>3</sub>]<sup>2+</sup>; 625.1289 (625.1324) for [A<sup>1</sup><sub>2</sub>L<sub>3</sub>Zn<sub>2</sub> + CF<sub>3</sub>SO<sub>3</sub>]<sup>3+</sup>. EA calc. for C<sub>97</sub>H<sub>90</sub>F<sub>12</sub>N<sub>14</sub>O<sub>12</sub>S<sub>10</sub>Zn<sub>2</sub>·3CH<sub>3</sub>CN·15H<sub>2</sub>O ([A<sup>1</sup><sub>2</sub>L<sub>3</sub>Zn<sub>2</sub>]<sub>3</sub>·3CH<sub>3</sub>CN·15H<sub>2</sub>O): C, 45.54, H, 4.79, N, 8.77%; Found, C, 45.15, H, 4.47, N, 8.63%. <sup>1</sup>H NMR (400 MHz, CD<sub>3</sub>CN) δ 8.65 (s, 2H), 8.49 (d, 2H), 8.00 (d, 2H), 7.56 (s, 2H), 7.06 (s, 2H), 3.86 (s, 1H), 3.64 (s, 1H), 3.23 (s, 1H), 2.95 (s, 2H), 2.61 (s, 1H), 2.10 (s, 1H), 1.64 (s, 3H). <sup>13</sup>C NMR (100 MHz, CD<sub>3</sub>CN) δ 162.56, 145.23, 144.28, 138.05, 137.72, 135.80, 135.15, 134.66, 133.46, 128.77, 128.50, 56.01, 53.96, 38.41, 22.95 – 21.88, 13.88. IR (KBr pellets, cm<sup>-1</sup>): 3450, 2915, 2852, 1654, 1589, 1562, 1495, 1459, 1380, 1258, 1223, 1162, 1031, 899, 875, 639.

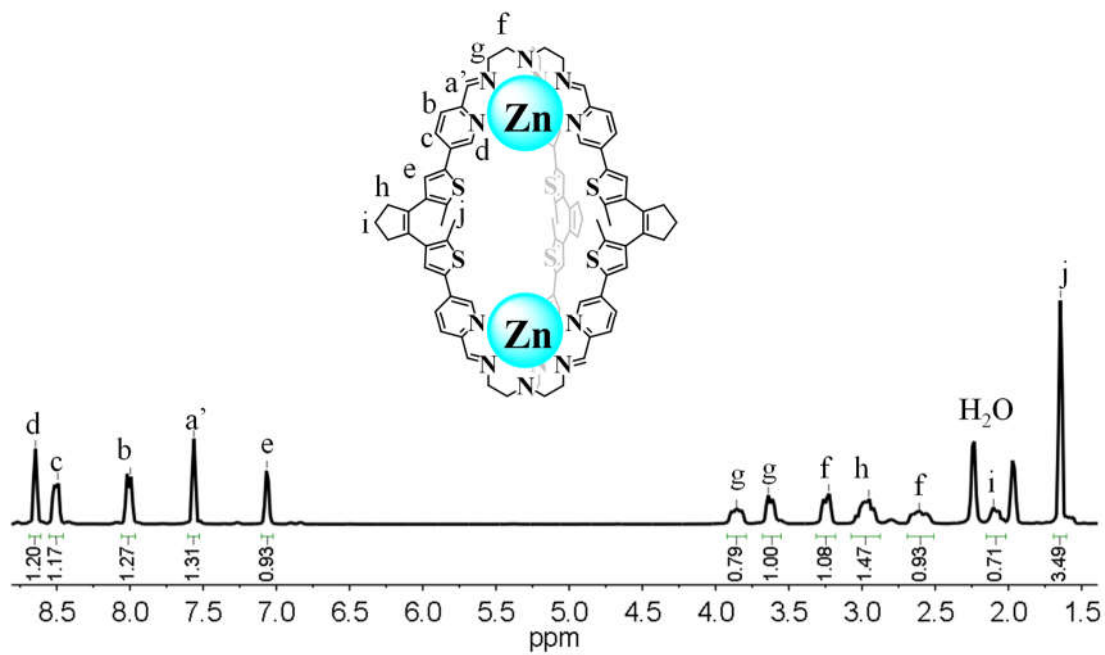

**Figure S5.**  $^1\text{H}$  NMR spectrum for  $o\text{-A}^{12}\text{L}_3\text{Zn}_2$  cage ( $\text{CD}_3\text{CN}$ ,  $25^\circ\text{C}$ ).

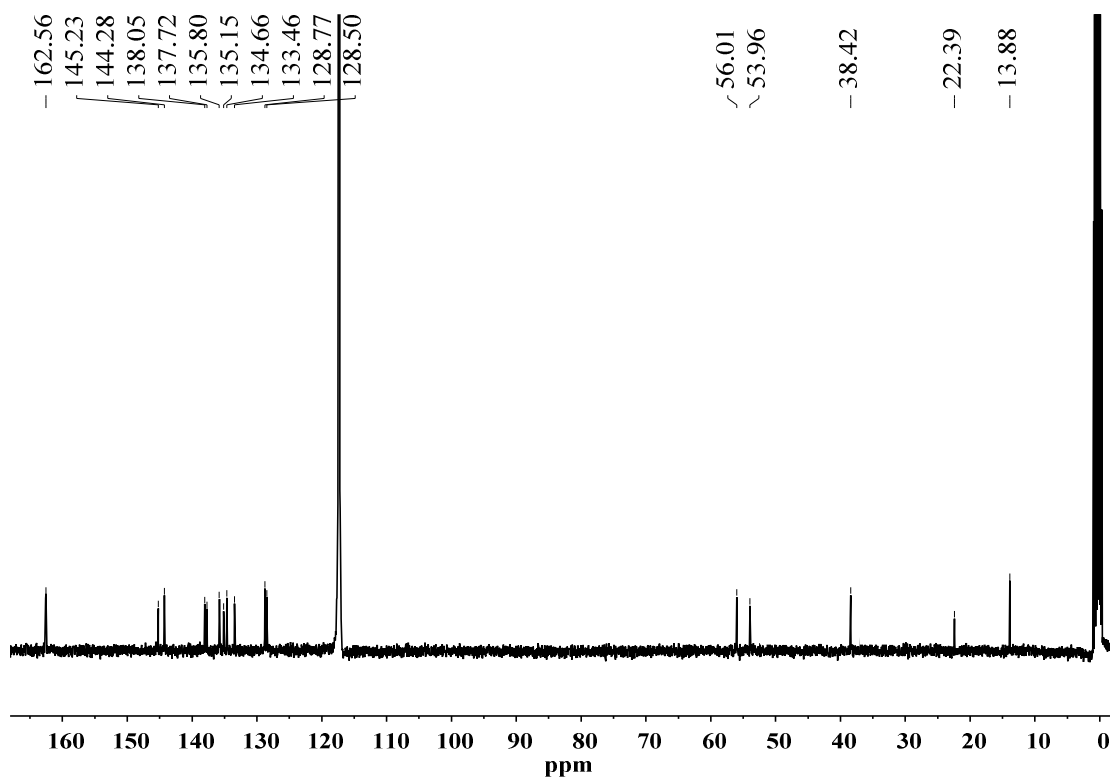

**Figure S6.**  $^{13}\text{C}$  NMR spectrum for  $o\text{-A}^{12}\text{L}_3\text{Zn}_2$  cage ( $\text{CD}_3\text{CN}$ ,  $25^\circ\text{C}$ ).

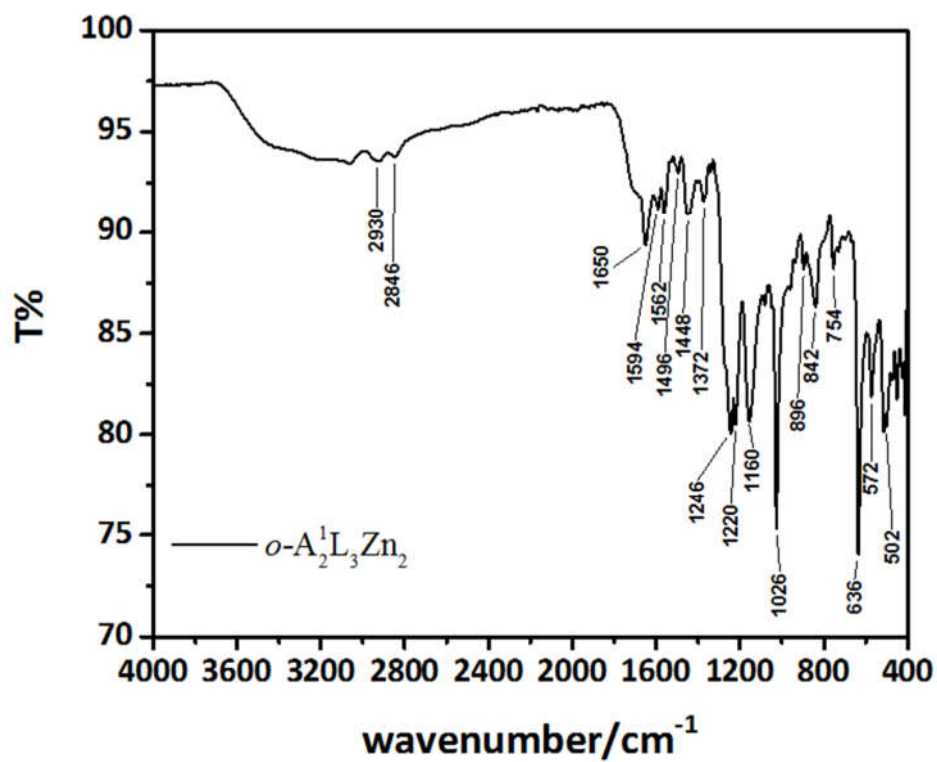

Figure S7. FT-IR spectrum for  $o\text{-A}_2\text{L}_3\text{Zn}_2$  cage.

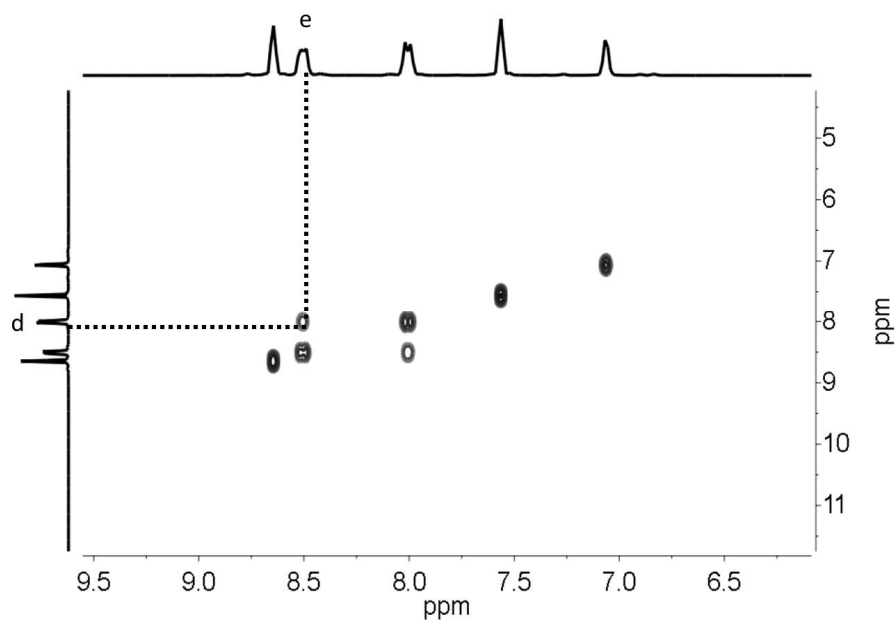

Figure S8.  $^1\text{H}\text{-}^1\text{H}$  COSY spectrum for  $o\text{-A}_2\text{L}_3\text{Zn}_2$  cage ( $\text{CD}_3\text{CN}$ ,  $25^\circ\text{C}$ ).

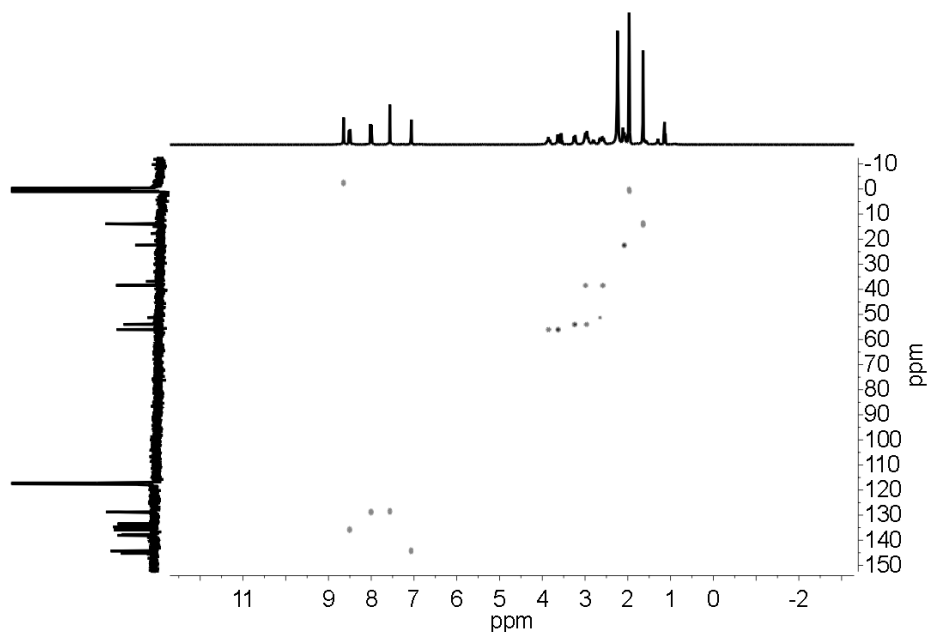

**Figure S9.** HSQC spectrum for *o*-A<sup>1</sup><sub>2</sub>L<sub>3</sub>Zn<sub>2</sub> cage (CD<sub>3</sub>CN, 25°C).

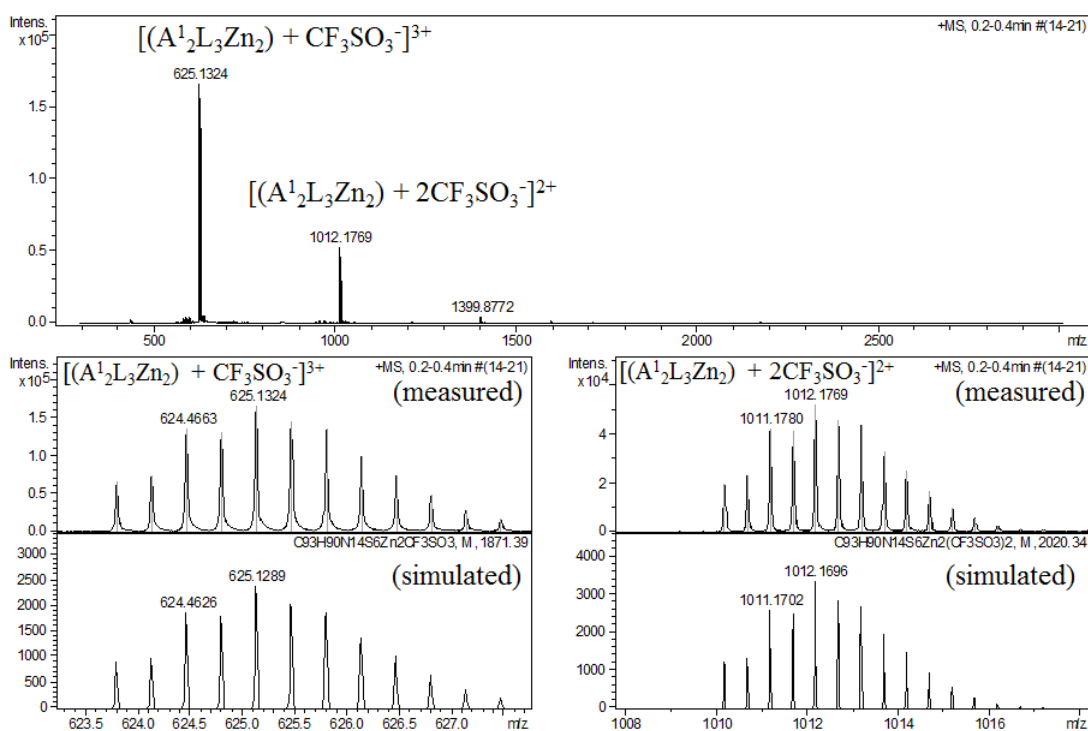

**Figure S10.** High resolution ESI-MS spectrum for *o*-A<sup>1</sup><sub>2</sub>L<sub>3</sub>Zn<sub>2</sub> cage (CH<sub>3</sub>CN, 25°C).

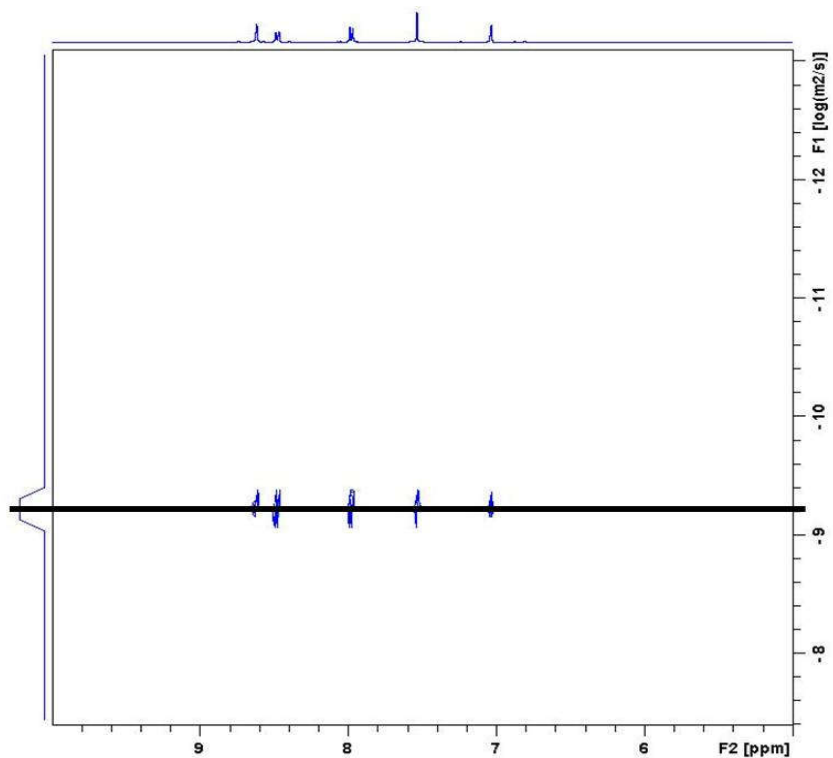

**Figure S11.** DOSY spectrum for *o*-A<sup>1</sup><sub>2</sub>L<sub>3</sub>Zn<sub>2</sub> cage (CD<sub>3</sub>CN, 25°C).

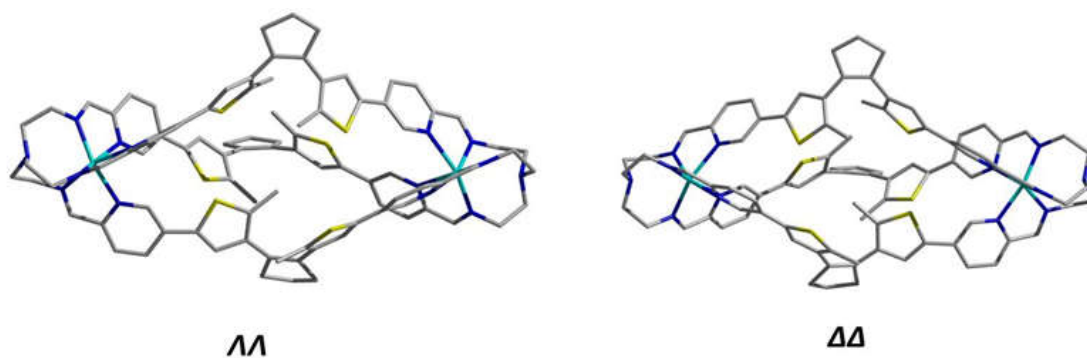

**Figure S12.** A pair of  $\Lambda\Lambda$ - and  $\Delta\Delta$ -enantiomeric cages coexist in the crystal lattice of *o*-A<sup>1</sup><sub>2</sub>L<sub>3</sub>Zn<sub>2</sub> cage (grey for C, blue for N, yellow for S, cyan for Zn, H atoms, solvents and counter anions are omitted for clarity).

### 2.3 *o*-A<sup>2</sup>L<sub>3</sub>Cd<sub>2</sub> cage

PADTE (4.7 mg, 0.01 mmol, 3 equiv) and cadmium triflate (2.7 mg, 2 equiv) was added into 0.5 mL CH<sub>3</sub>CN and stirred for 10 minutes. Addition of tris(3-aminopropyl)amine (1.3 μL, 0.0067 mmol, 2 equiv) resulted in large quantity of precipitates. Further addition of 1 mL CHCl<sub>3</sub> and heating at 50 °C for 12 hours resulted in clear yellow solution. Yellow crude product of *o*-A<sup>2</sup>L<sub>3</sub>Cd<sub>2</sub> cage was obtained by rotary evaporation of the solvent, which was washed with CHCl<sub>3</sub> and water successively and then dissolved again in CH<sub>3</sub>CN. 3 mg pure powder product of the cage was obtained by evaporation of the filtrate, yield 34%. For single crystal suitable for X-ray diffraction, 3 mg powder product of the cage was dissolved in CH<sub>3</sub>CN, and then diffusion of ether into the CH<sub>3</sub>CN solution under room temperature for one month led to block yellowish green single crystals. High resolution ESI-MS (*m/z*) data: calc. (measured): 1011.1926 (1011.1926) for [A<sup>2</sup>L<sub>3</sub>Cd<sub>2</sub> + 2CF<sub>3</sub>SO<sub>3</sub>]<sup>2+</sup>; 684.8131 (684.8111) for [A<sup>2</sup>L<sub>3</sub>Cd<sub>2</sub> + CF<sub>3</sub>SO<sub>3</sub>]<sup>3+</sup>; 476.1235 (476.1201) for [A<sup>2</sup>L<sub>3</sub>Cd<sub>2</sub>]<sup>4+</sup>. <sup>1</sup>H NMR (400 MHz, CD<sub>3</sub>CN) δ 8.54 (d, *J* = 1.9 Hz, 1H), 8.36 (dd, *J* = 8.1, 2.3 Hz, 1H), 7.89 (d, *J* = 8.2 Hz, 1H), 7.42 (s, 1H), 7.07 (d, *J* = 2.4 Hz, 1H), 3.80 (d, *J* = 12.3 Hz, 1H), 3.47 (q, *J* = 13.6, 13.1 Hz, 2H), 2.89 (dt, *J* = 14.3, 7.3 Hz, 1H), 2.53 (dt, *J* = 14.8, 7.1 Hz, 1H), 2.26 (t, *J* = 13.6 Hz, 1H), 2.06 (q, *J* = 7.7, 7.3 Hz, 1H), 1.93 (s, 2H), 1.62 (s, 3H). <sup>13</sup>C NMR (100 MHz, CD<sub>3</sub>CN) δ 162.03, 145.58, 144.91, 137.88, 137.62, 135.88, 135.10, 135.06, 133.84, 128.54, 127.70, 61.89, 58.26, 38.38, 25.43, 22.45, 13.41. IR (KBr pellets, cm<sup>-1</sup>): 3482, 2924, 2844, 1648, 1584, 1558, 1498, 1444, 1358, 1252, 1220, 1152, 1028, 838, 740, 636, 572, 514.

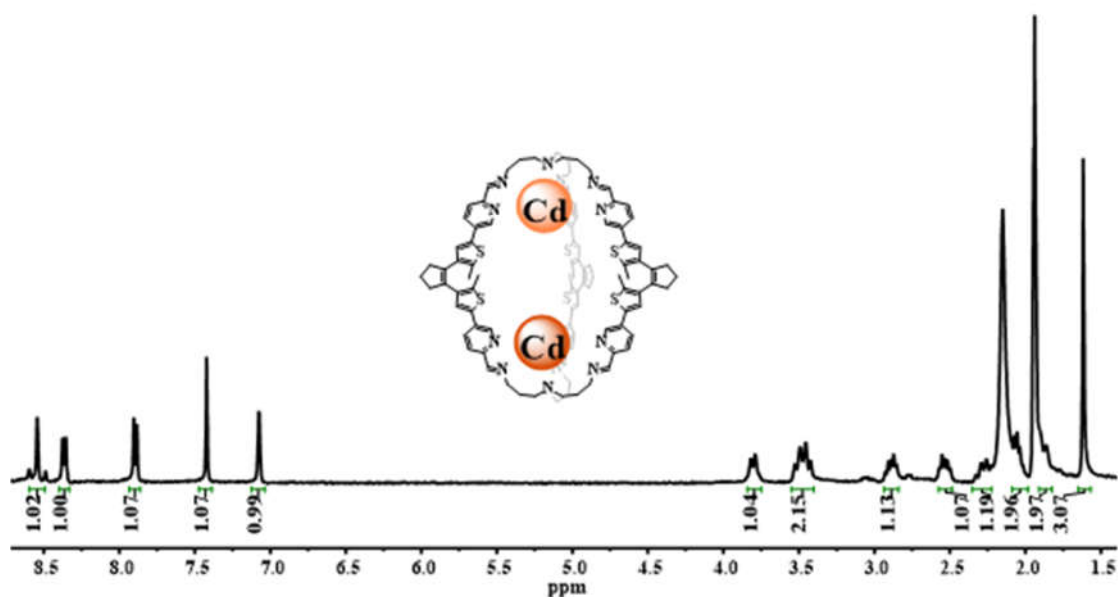

Figure S13. <sup>1</sup>H NMR spectrum for *o*-A<sup>2</sup>L<sub>3</sub>Cd<sub>2</sub> cage (CD<sub>3</sub>CN, 25 °C).

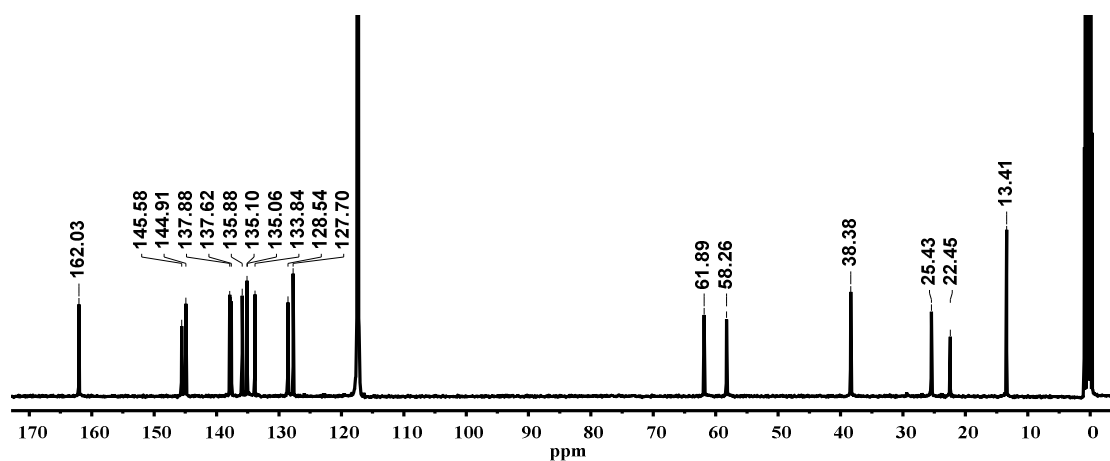

Figure S14.  $^{13}\text{C}$  NMR spectrum for  $o\text{-A}^2\text{L}_3\text{Cd}_2$  cage ( $\text{CD}_3\text{CN}$ ,  $25^\circ\text{C}$ ).

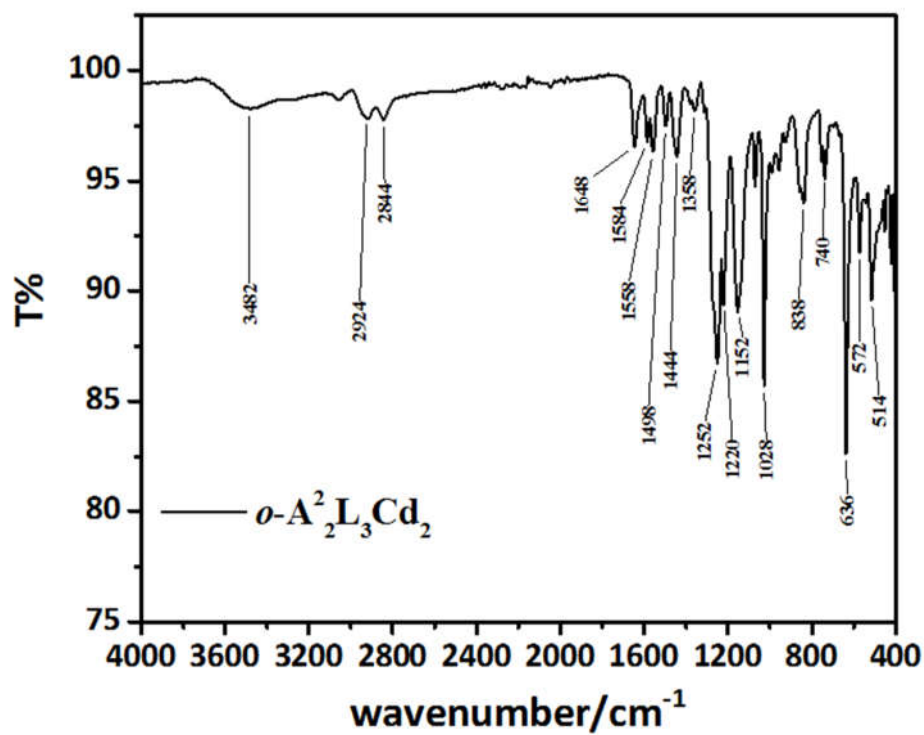

Figure S15. FT-IR spectrum for  $o\text{-A}^2\text{L}_3\text{Cd}_2$  cage.

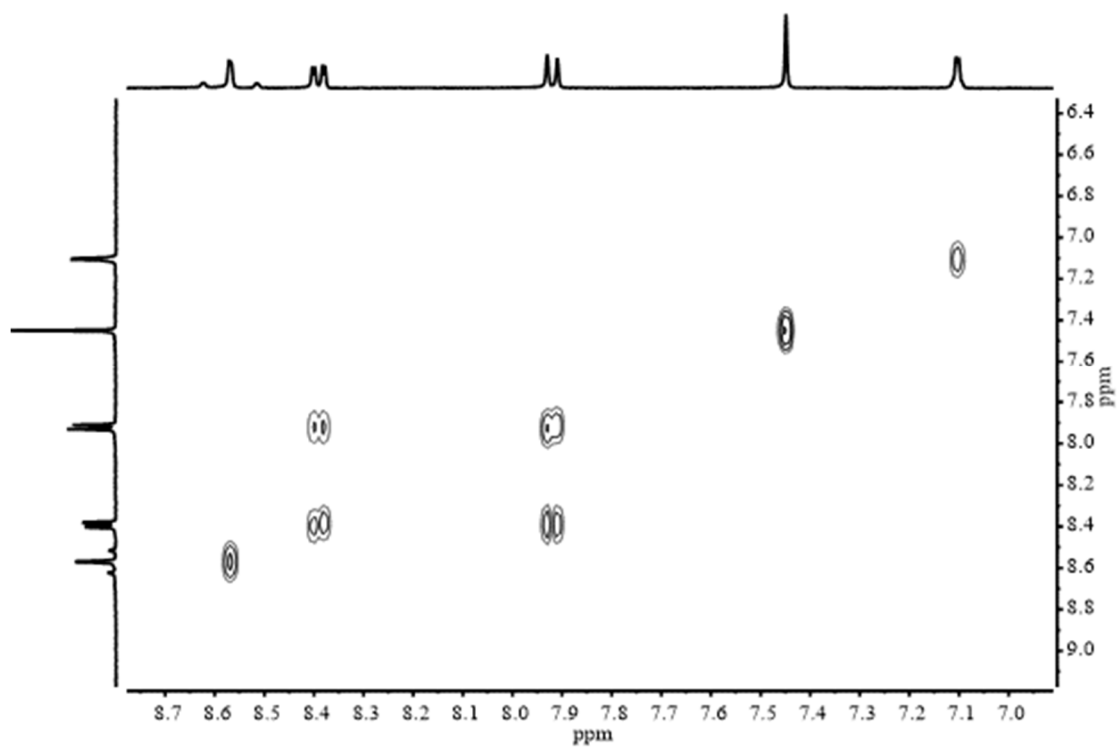

**Figure S16.** <sup>1</sup>H-<sup>1</sup>H COSY spectrum for *o*-A<sup>2</sup>L<sub>3</sub>Cd<sub>2</sub> cage (CD<sub>3</sub>CN, 25°C).



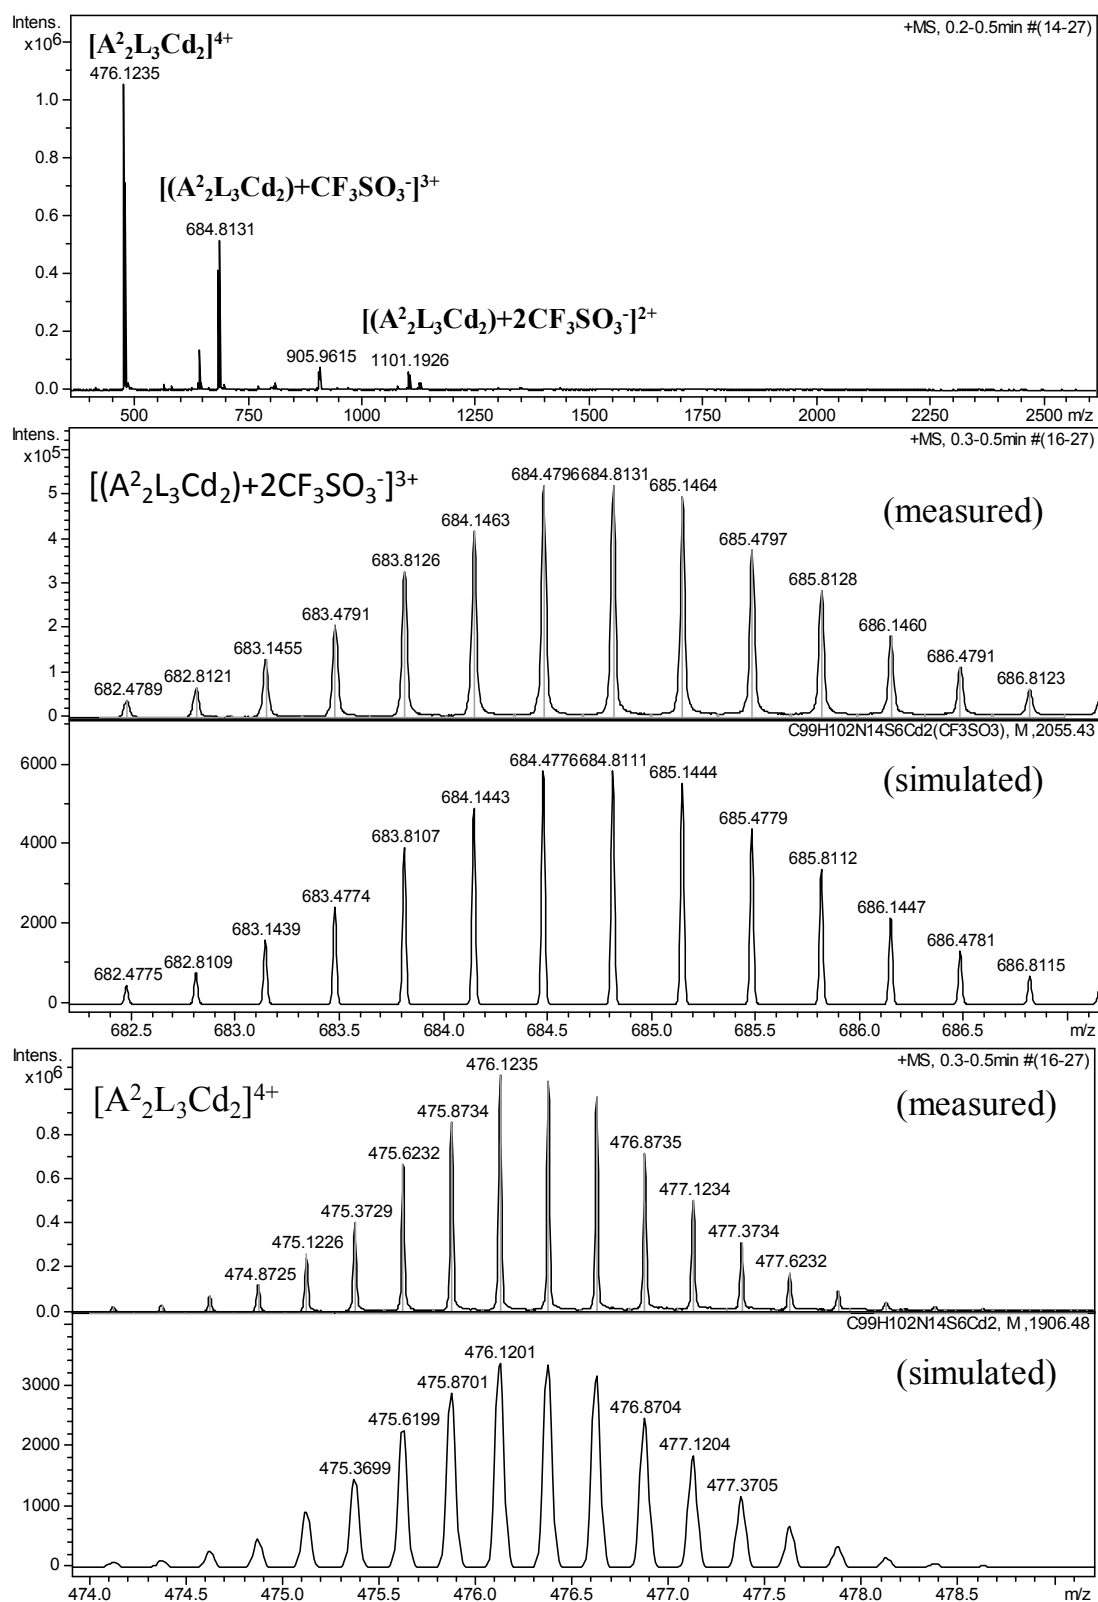

**Figure S17.** High resolution ESI-MS spectrum for *o*- $A^2L_3Cd_2$  cage ( $CH_3CN$ ,  $25^\circ C$ ).

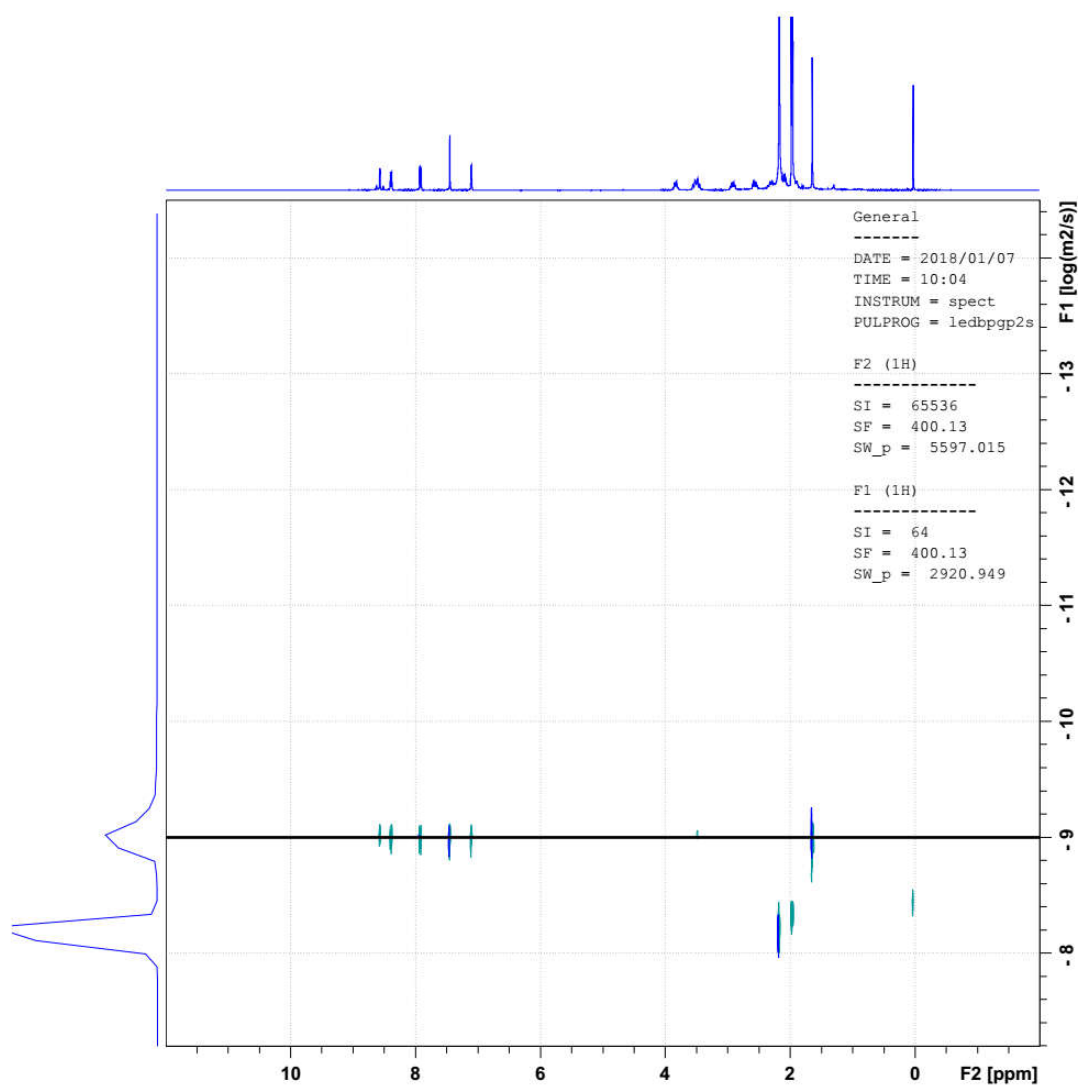

**Figure S18.** DOSY spectrum for *o*-A<sup>2</sup>L<sub>3</sub>Cd<sub>2</sub> cage (CD<sub>3</sub>CN, 25°C).

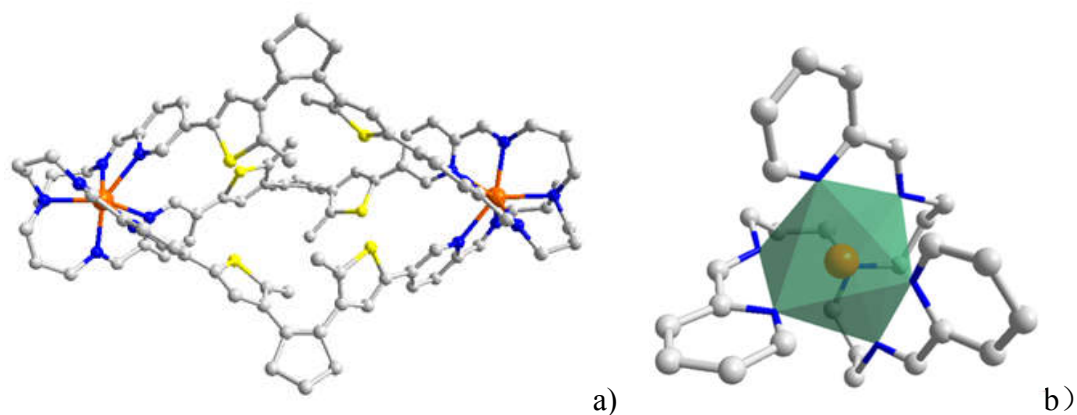

**Figure S19.** (a) Single-crystal structure of *o*-A<sup>2</sup>L<sub>3</sub>Cd<sub>2</sub> cage. (b) Coordination geometry of Cd<sup>II</sup> (grey for C, blue for N, yellow for S, orange for Cd, H atoms, solvents and counter anions are omitted for clarity).

## 2.4 *o*-A<sup>2</sup>L<sub>3</sub>Zn<sub>2</sub> cage

PADTE (4.7 mg, 0.01 mmol, 3 equiv) and zinc triflate (2.4 mg, 2 equiv) was added into 0.5 mL CH<sub>3</sub>CN and stirred for 10 minutes. Addition of tris(3-aminopropyl)amine (1.3  $\mu$ l, 0.0067 mmol, 2 equiv) resulted in large quantity of precipitates. Further addition of 1 mL CHCl<sub>3</sub> and heating at 50  $^{\circ}$ C for 12 hours resulted in clear yellow solution. Yellow crude product of *o*-A<sup>2</sup>L<sub>3</sub>Zn<sub>2</sub> cage was obtained by rotary evaporation of the solvent, which was washed with CHCl<sub>3</sub> and water successively, and then dissolved again in CH<sub>3</sub>CN. Pure powder product of the cage was obtained by evaporation of the filtrate. For single crystal suitable for X-ray diffraction, 10 mg powder product of the R-A<sup>1</sup>L<sub>3</sub> cage was dissolved in CHCl<sub>3</sub> and natural evaporation under room temperature for three months led to block colorless single crystals. High resolution ESI-MS (*m/z*) data: calc. (measured): 1054.2167 (1054.1936) for [A<sup>2</sup>L<sub>3</sub>Zn<sub>2</sub> + 2CF<sub>3</sub>SO<sub>3</sub>]<sup>2+</sup>; 653.1603 (653.1422) for [A<sup>2</sup>L<sub>3</sub>Zn<sub>2</sub> + CF<sub>3</sub>SO<sub>3</sub>]<sup>3+</sup>; 452.6321 (452.6233) for [A<sup>2</sup>L<sub>3</sub>Zn<sub>2</sub>]<sup>4+</sup>. <sup>1</sup>H NMR (400 MHz, CD<sub>3</sub>CN)  $\delta$  8.54 – 8.46 (m, 2H), 7.97 (d, *J* = 8.2 Hz, 1H), 7.61 (d, *J* = 3.4 Hz, 1H), 7.39 (d, *J* = 2.2 Hz, 1H), 3.61 (dd, *J* = 11.3, 6.4 Hz, 1H), 3.30 (t, *J* = 10.7 Hz, 1H), 2.94 (dq, *J* = 18.8, 12.1, 9.8 Hz, 3H), 2.59 (dt, *J* = 14.5, 7.2 Hz, 2H), 2.15 – 2.03 (m, 3H), 1.73 (s, 3H).

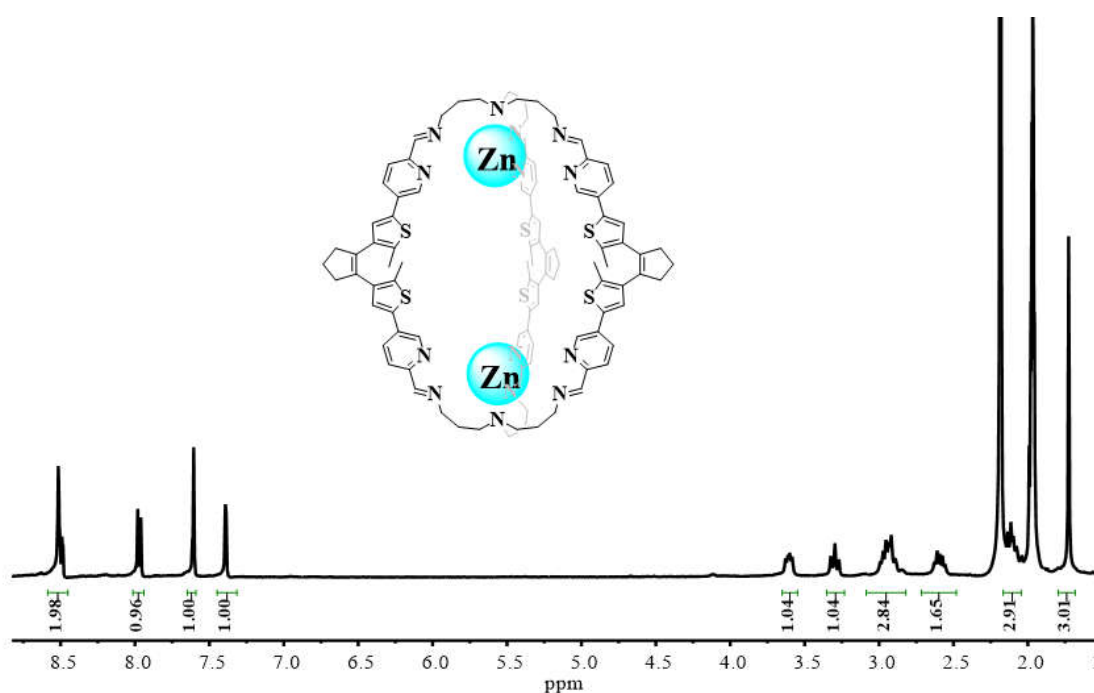

**Figure S20.** <sup>1</sup>H NMR spectrum for *o*-A<sup>2</sup>L<sub>3</sub>Zn<sub>2</sub> cage (CD<sub>3</sub>CN, 25 $^{\circ}$ C).

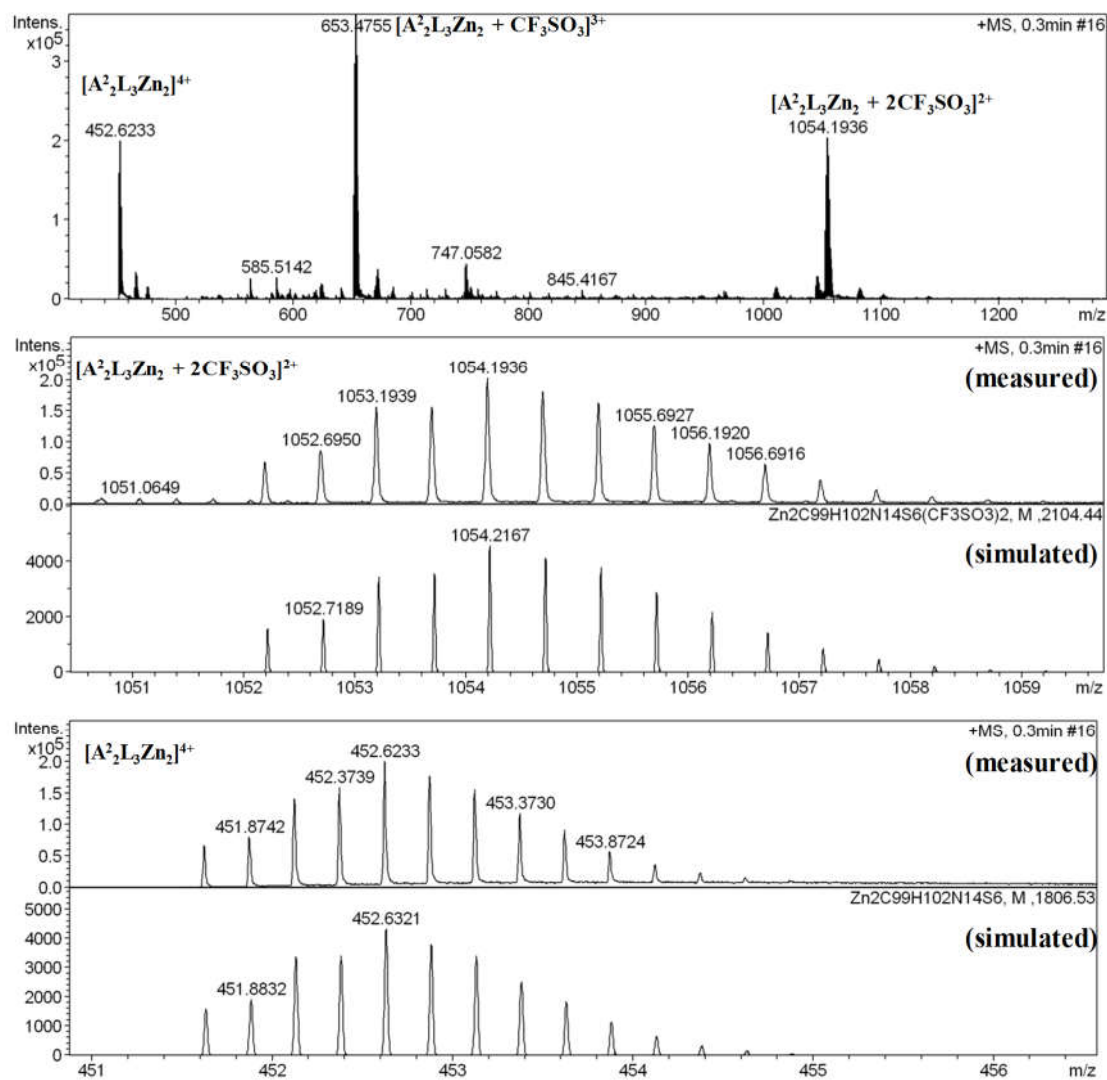

**Figure S21.** High resolution ESI-MS spectrum for  $o$ - $A^2L_3Zn_2$  cage ( $CH_3CN$ ,  $25^\circ C$ ).

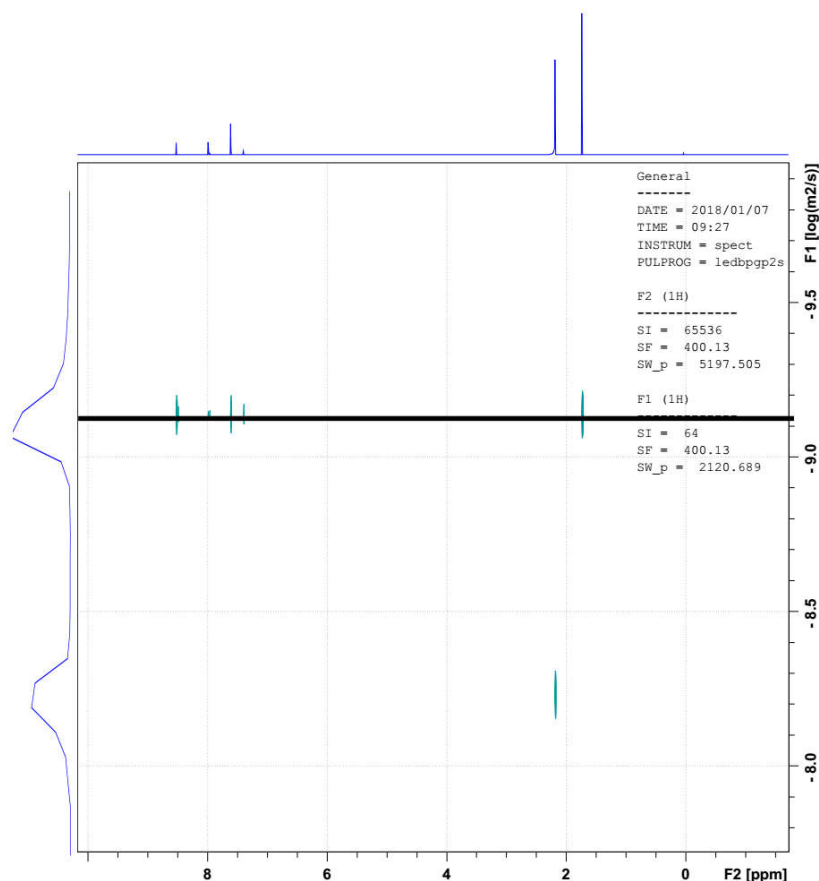

**Figure S22.** DOSY spectrum for *o*-A<sup>2</sup>L<sub>3</sub>Zn<sub>2</sub> cage (CD<sub>3</sub>CN, 25 °C).

### 2.5 *o*-R-A<sup>1</sup>L<sub>3</sub> cage

To a 50 mL flask was added *o*-A<sup>1</sup>L<sub>3</sub>Zn<sub>2</sub> cage (110 mg, 0.05 mmol, 1 equiv), sodium borohydride (60 mg, 1.6 mmol, 32 equiv) and dry MeOH (15 mL). The solution was stirred overnight under a nitrogen atmosphere at room temperature. Then 37% hydrochloric acid was added to bring the pH to 2, and a pale green solid precipitated out. This precipitate was washed by water, dissolved by CH<sub>3</sub>OH and then 2M NaOH aqueous solution was added, giving a light purple precipitate. The precipitate was isolated by centrifugation, washed by water, and then dissolved by CH<sub>3</sub>OH, concentrated in vacuo. The product was obtained as a pale purple solid (50 mg, 62%). High resolution ESI-MS (*m/z*) data: calc. (measured): 804.8455 (804.8512) for [R-A<sup>1</sup>L<sub>3</sub> + 2H]<sup>2+</sup>; 536.8995 (536.9033) for [R-A<sup>1</sup>L<sub>3</sub> + 3H]<sup>3+</sup>; 402.9264 (402.9289) for [R-A<sup>1</sup>L<sub>3</sub> + 4H]<sup>4+</sup>. <sup>1</sup>H NMR (400 MHz, CD<sub>3</sub>OD) δ 8.41 (s, 2H), 7.66 (d, 2H), 7.31 (d, 2H), 7.22 (s, 2H), 3.89 (s, 4H), 2.88 (s, 4H), 2.82 (t, 4H), 2.75 (s, 4H), 2.08 (t, 2H), 1.75 (s, 6H). <sup>13</sup>C NMR (100 MHz, CD<sub>3</sub>OD) δ 156.61, 144.95, 137.12, 135.61, 135.06, 134.46, 132.68, 129.03, 124.82, 122.00, 53.50, 53.12, 38.48, 22.40, 13.63. IR (KBr pellets, cm<sup>-1</sup>): 3248, 2918, 2836, 1658, 1598, 1564, 1498, 1436, 1384, 1292, 1254, 1200, 1122, 1028, 948, 824, 752, 642, 564, 498.

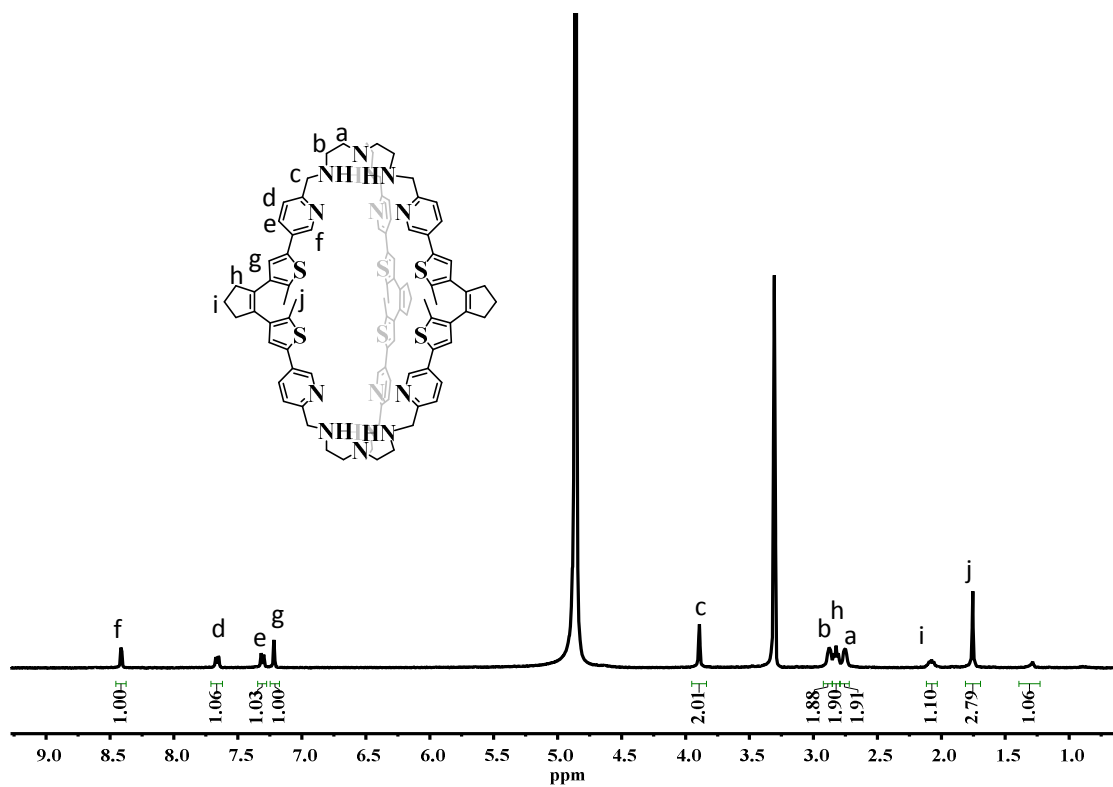

Figure S23. <sup>1</sup>H NMR spectrum for *o*-R-A<sub>12</sub>L<sub>3</sub> cage (CD<sub>3</sub>OD, 25°C).

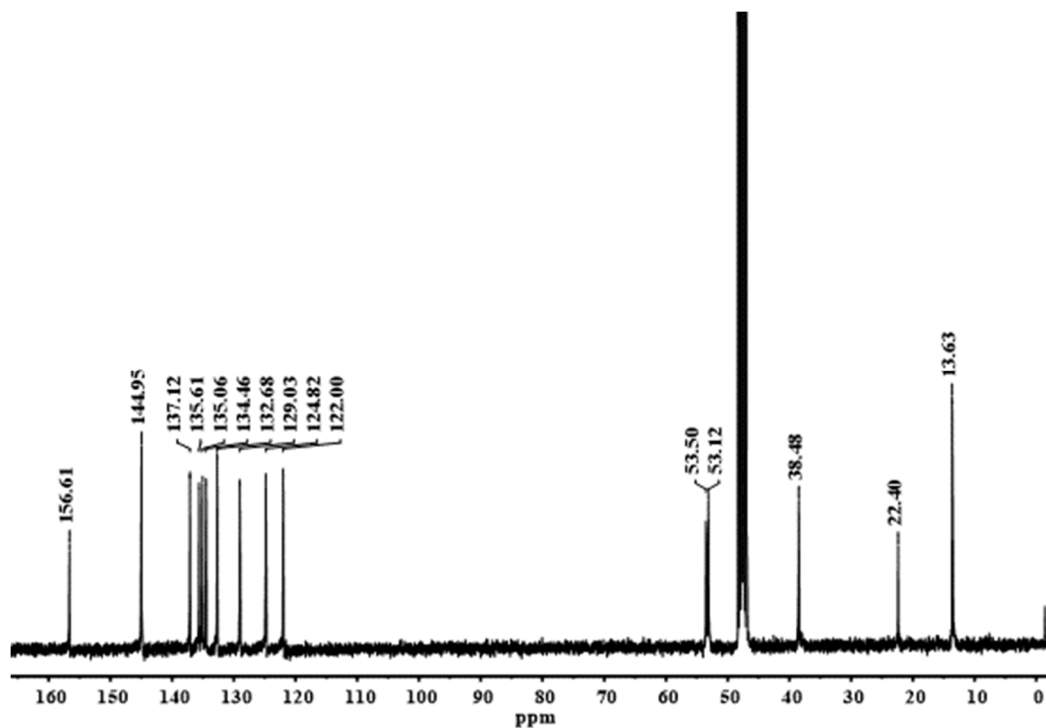

Figure S24. <sup>13</sup>C NMR spectrum for *o*-R-A<sub>12</sub>L<sub>3</sub> cage (CD<sub>3</sub>OD, 25°C).

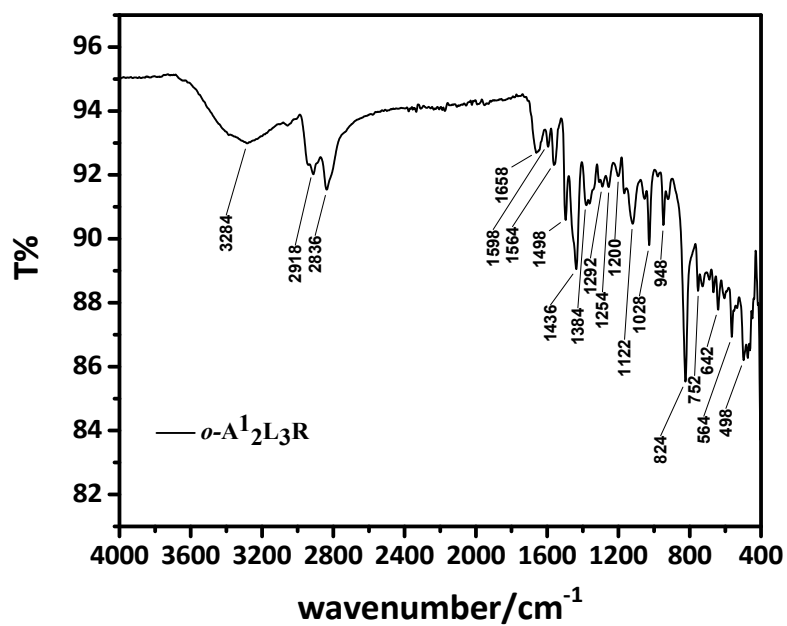

Figure S25. FT-IR spectrum for *o*-R-A<sup>1</sup><sub>2</sub>L<sub>3</sub> cage.

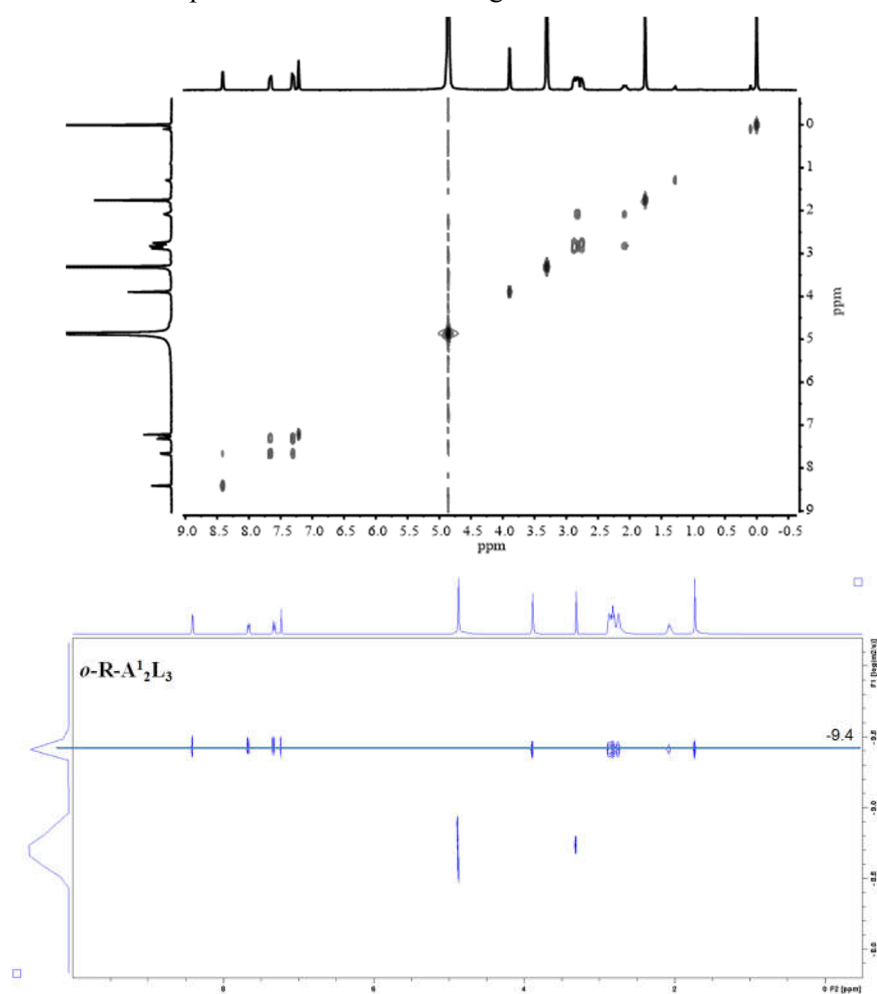

Figure S26. <sup>1</sup>H-<sup>1</sup>H COSY spectrum (upper) and DOSY spectrum (lower) for *o*-R-A<sup>1</sup><sub>2</sub>L<sub>3</sub> cage (CD<sub>3</sub>OD, 25°C).

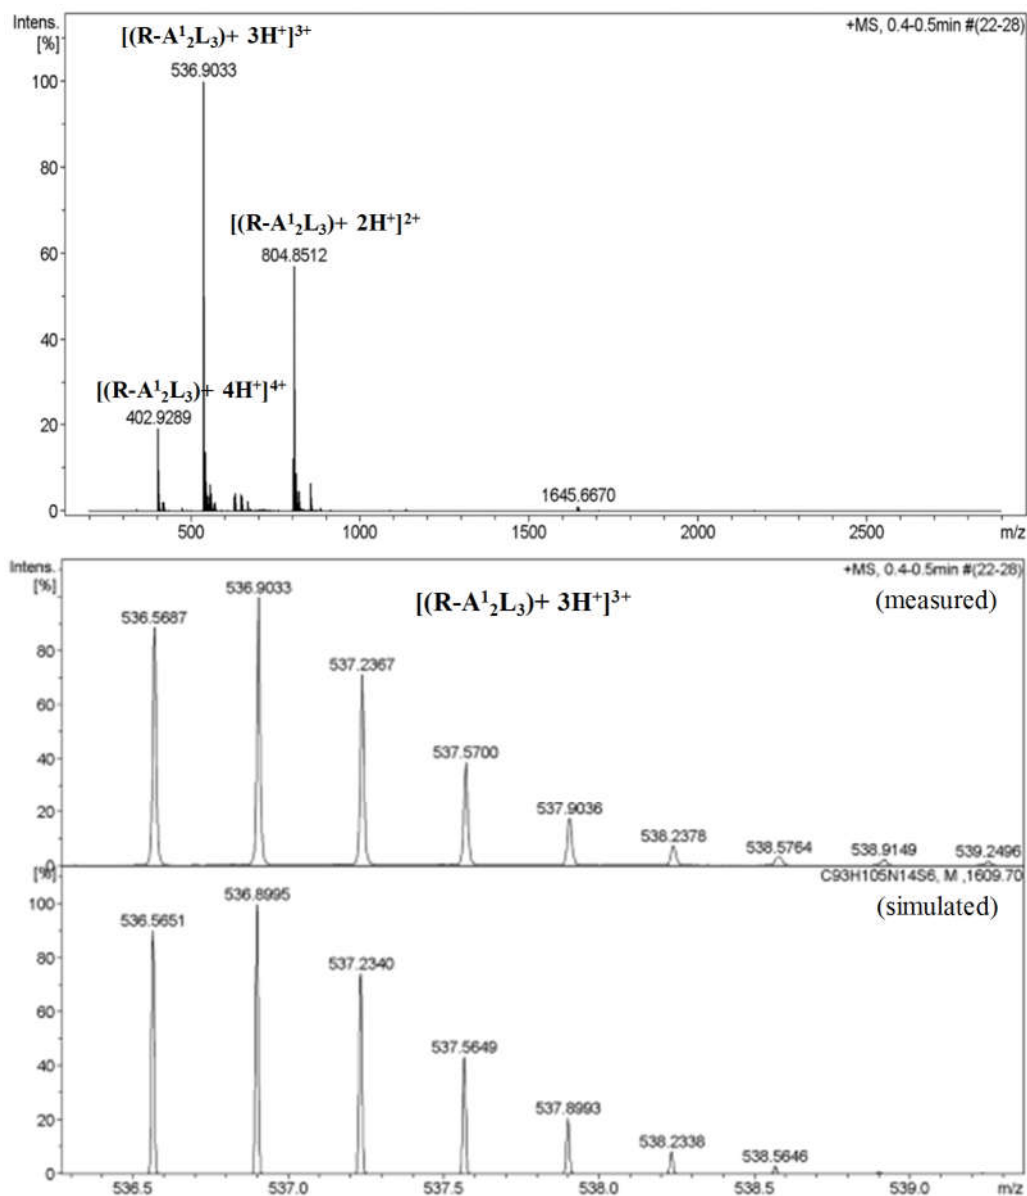

**Figure S27.** High resolution ESI-MS spectrum for *o*-R-A<sup>1</sup><sub>2</sub>L<sub>3</sub> cage (CH<sub>3</sub>OH, 25°C).

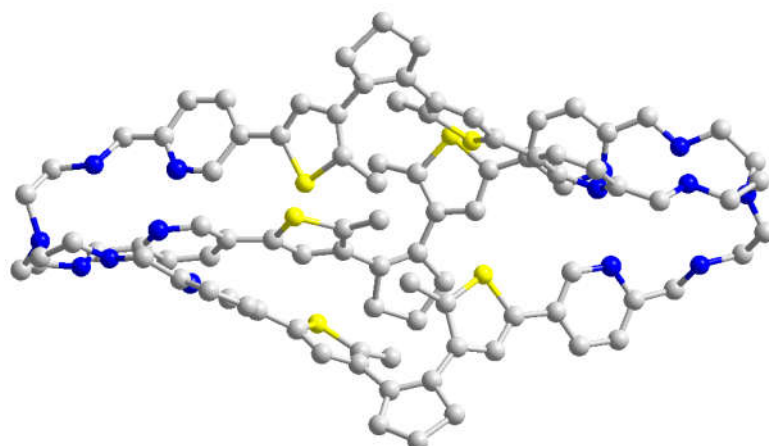

**Figure S28.** Single-crystal structure of *o*-R-A<sup>1</sup><sub>2</sub>L<sub>3</sub> cage (grey for C, blue for N, yellow for S, H atoms and solvents are omitted for clarity).



## 2.6 *o*-R-A<sup>2</sup>L<sub>3</sub> cage

To a 25 mL flask was added *o*-A<sup>2</sup>L<sub>3</sub>Cd<sub>2</sub> cage (50.0 mg, 18.7 μmol, 1 equiv), sodium borohydride (60 mg, 1.6 mmol, 86 equiv) and dry MeOH (8 mL). The solution was stirred overnight under a nitrogen atmosphere at 50 °C. Then 37% hydrochloric acid was added to bring the pH to 2, and a pale green solid precipitated out. This precipitate was washed by water, dissolved by CH<sub>3</sub>OH and then 2M NaOH aqueous solution was added, giving a solid precipitate. The precipitate was isolated by centrifugation, washed by water twice, and then dissolved by CH<sub>3</sub>OH, concentrated in vacuo. The product was obtained as a pale purple solid (22 mg, 68%). High resolution ESI-MS (*m/z*) data: calc. (measured): 1692.7777 (1692.7493) [R-A<sup>2</sup>L<sub>3</sub> + H<sup>+</sup>]<sup>+</sup>, 846.8925 (846.8807) [R-A<sup>2</sup>L<sub>3</sub> + 2H<sup>+</sup>]<sup>2+</sup>, 564.9308 (564.9236) [R-A<sup>2</sup>L<sub>3</sub> + 3H<sup>+</sup>]<sup>3+</sup>. <sup>1</sup>H NMR (400 MHz, CD<sub>3</sub>OD) δ 8.65 (d, *J* = 2.4 Hz, 1H), 7.80 (dd, *J* = 8.1, 2.4 Hz, 1H), 7.28 (d, *J* = 8.1 Hz, 1H), 7.25 (s, 1H), 3.74 (s, 2H), 2.82 (t, *J* = 7.4 Hz, 2H), 2.66 (t, *J* = 7.0 Hz, 2H), 2.40 (d, *J* = 6.5 Hz, 3H), 2.06 (q, *J* = 7.6 Hz, 1H), 1.79 - 1.68 (m, 2H), 1.64 (s, 3H), 1.29 (s, 1H). <sup>13</sup>C NMR (100 MHz, CD<sub>3</sub>OD) δ 158.11, 145.71, 137.77, 136.43, 135.86, 135.02, 133.55, 129.70, 125.52, 123.29, 54.74, 52.94, 39.27, 27.31, 23.24, 14.22. IR (KBr, cm<sup>-1</sup>): 3450, 2915, 2852, 1654, 1589, 1562, 1495, 1459, 1380, 1258, 1223, 1162, 1031, 899, 875, 639.

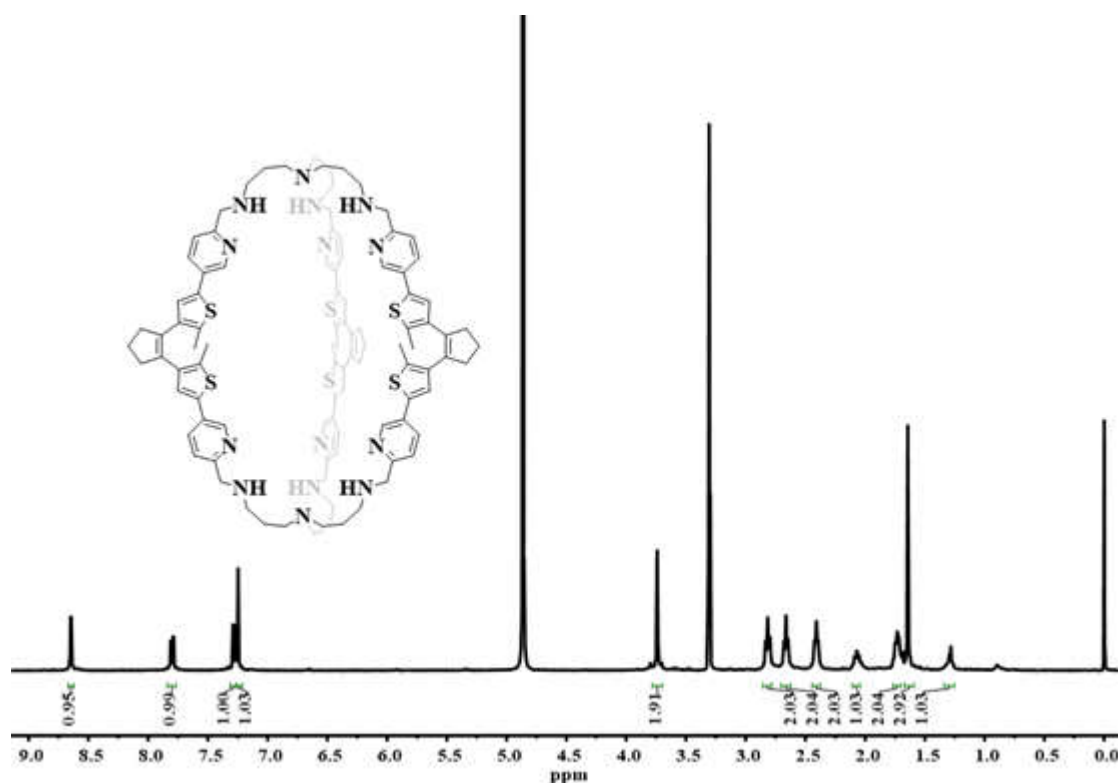

**Figure S29.** <sup>1</sup>H NMR spectrum for *o*-R-A<sup>2</sup>L<sub>3</sub> cage (CD<sub>3</sub>OD, 25°C).

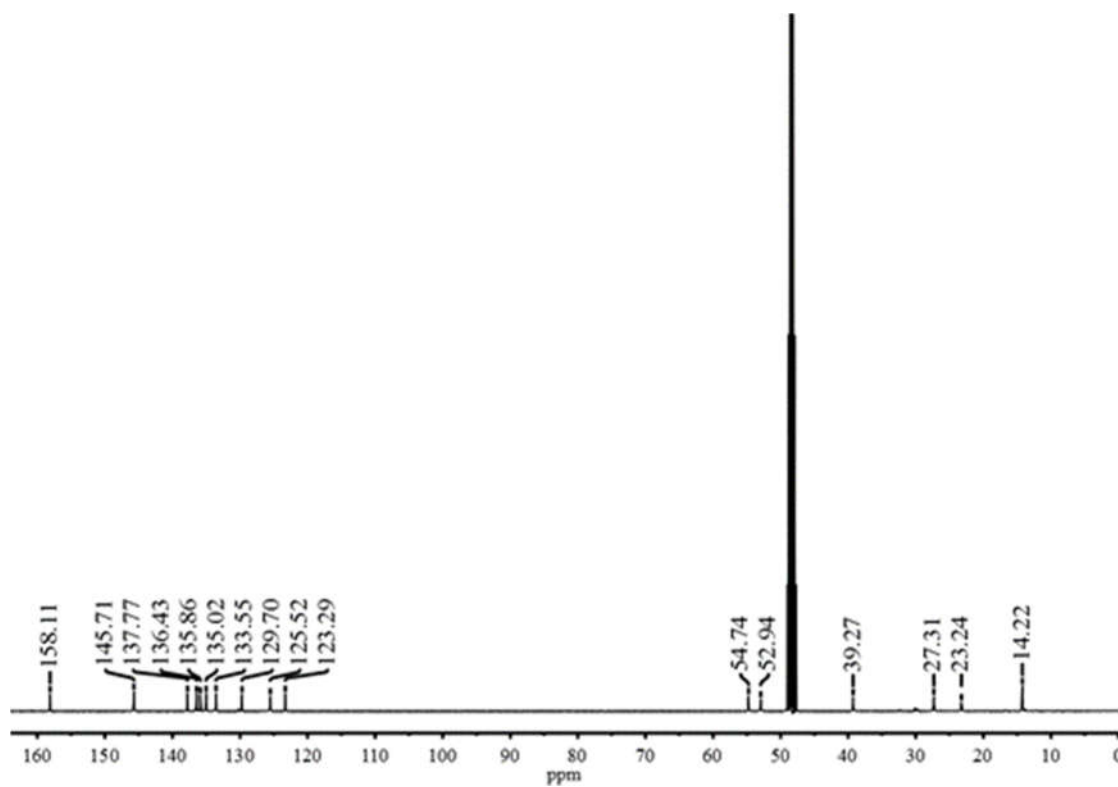

Figure S30.  $^{13}\text{C}$  NMR spectrum for  $o\text{-R-A}^2_2\text{L}_3$  cage ( $\text{CD}_3\text{OD}$ ,  $25^\circ\text{C}$ ).

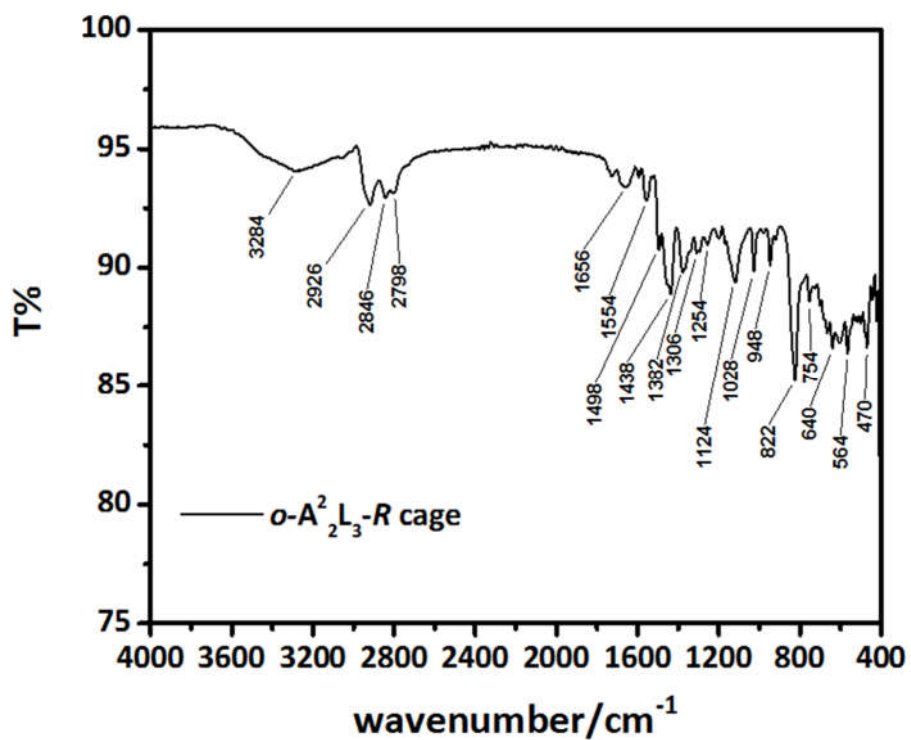

Figure S31. FT-IR spectrum for  $o\text{-A}^2_2\text{L}_3\text{-R}$  cage.

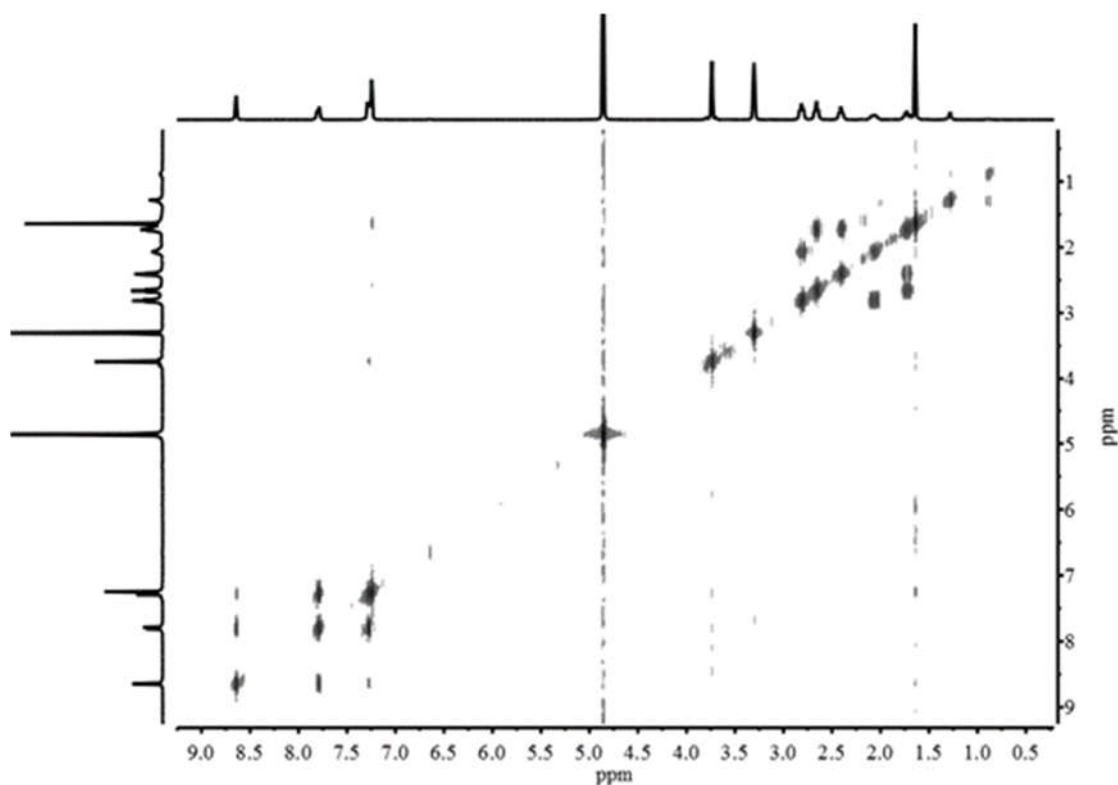

**Figure S32.**  $^1\text{H}$ - $^1\text{H}$  COSY spectrum for *o*-R- $\text{A}^2\text{L}_3$  cage ( $\text{CD}_3\text{OD}$ ,  $25^\circ\text{C}$ ).

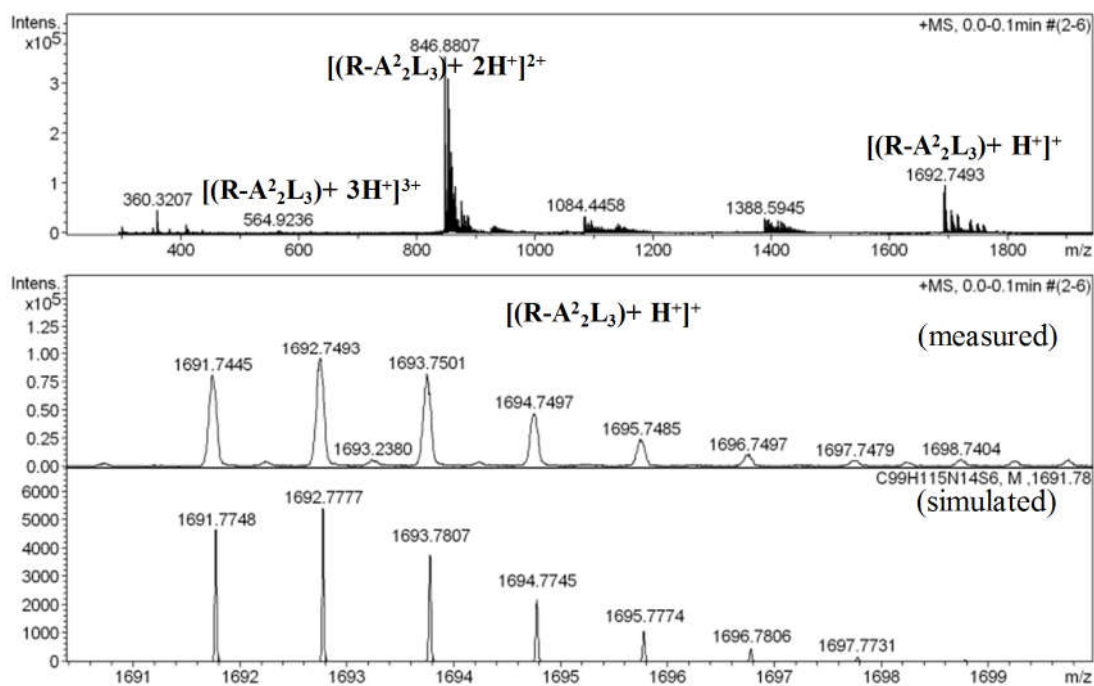

**Figure S33.** High resolution ESI-MS spectrum for *o*-R- $\text{A}^2\text{L}_3$  cage ( $\text{CH}_3\text{OH}$ ,  $25^\circ\text{C}$ ).

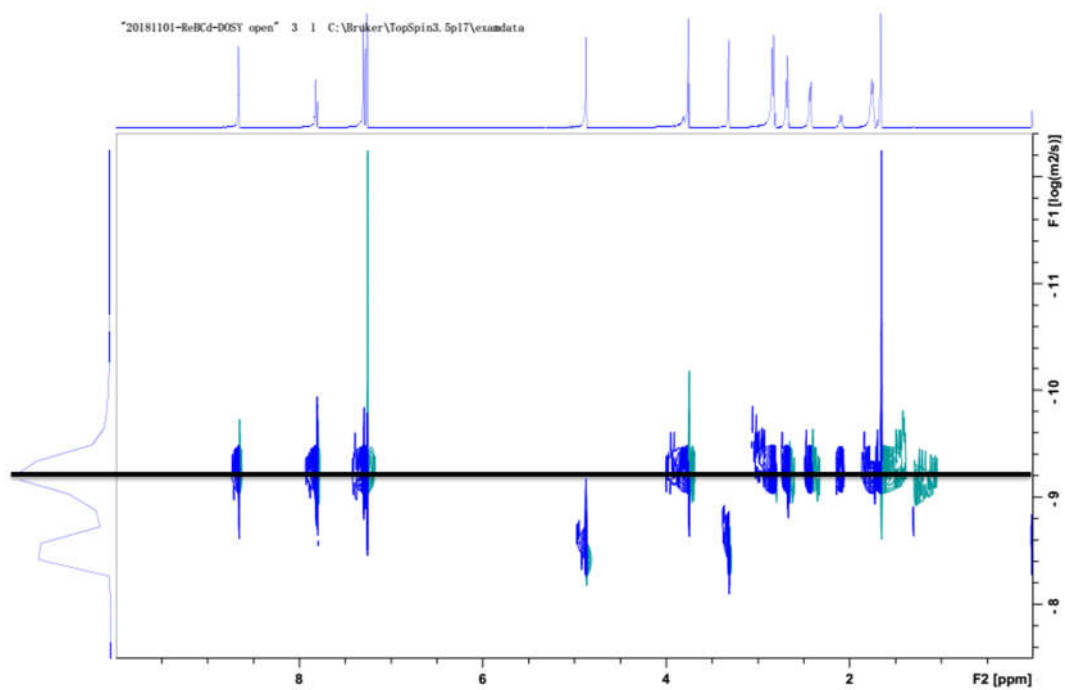

**Figure S34.** DOSY spectrum for *o*-R-A<sub>2</sub>L<sub>3</sub> cage (CD<sub>3</sub>OD, 25°C).

## 2.7 Crystal structures

**Table S1.** Crystallographic data summary for *o*-PADTE (CCDC 1917233), *c*-PADTE (CCDC 1919654).

|                                                | <i>o</i> -PADTE                                                              | <i>c</i> -PADTE                                                              |
|------------------------------------------------|------------------------------------------------------------------------------|------------------------------------------------------------------------------|
| Empirical Formula                              | C <sub>27</sub> H <sub>22</sub> N <sub>2</sub> O <sub>2</sub> S <sub>2</sub> | C <sub>27</sub> H <sub>22</sub> N <sub>2</sub> O <sub>2</sub> S <sub>2</sub> |
| Formula weight                                 | 470.58                                                                       | 470.58                                                                       |
| Temperature/K                                  | 161(17)                                                                      | 150.00(10)                                                                   |
| Crystal system                                 | monoclinic                                                                   | monoclinic                                                                   |
| Space group                                    | <i>C</i> 2/ <i>c</i>                                                         | <i>C</i> 2/ <i>c</i>                                                         |
| <i>a</i> (Å)                                   | 24.6968(7)                                                                   | 22.3150(13)                                                                  |
| <i>b</i> (Å)                                   | 9.9776(3)                                                                    | 12.4269(5)                                                                   |
| <i>c</i> (Å)                                   | 9.3115(2)                                                                    | 8.2043(5)                                                                    |
| $\alpha$ (°)                                   | 90                                                                           | 90                                                                           |
| $\beta$ (°)                                    | 93.975(2)                                                                    | 92.884(5)                                                                    |
| $\gamma$ (°)                                   | 90                                                                           | 90                                                                           |
| <i>V</i> (Å <sup>3</sup> )                     | 2288.97(11)                                                                  | 2272.2(2)                                                                    |
| <i>Z</i>                                       | 4                                                                            | 4                                                                            |
| $\rho_{\text{calc}}/\text{cm}^3$               | 1.366                                                                        | 1.376                                                                        |
| $\mu/\text{mm}^{-1}$                           | 2.330                                                                        | 2.348                                                                        |
| <i>F</i> (000)                                 | 984.0                                                                        | 984.0                                                                        |
| $2\theta$ range for data collection/°          | 7.176 to 133.022                                                             | 7.934 to 145.482                                                             |
| Reflections collected                          | 3471                                                                         | 3604                                                                         |
| Independent reflections                        | 1995<br>$R_{\text{int}} = 0.0154$ ,<br>$R_{\text{sigma}} = 0.0200$           | 2171<br>$R_{\text{int}} = 0.0245$ ,<br>$R_{\text{sigma}} = 0.0399$           |
| Data/restraints/parameters                     | 1995/0/151                                                                   | 2171/19/151                                                                  |
| Goodness-of-fit on $F^2$                       | 1.056                                                                        | 1.034                                                                        |
| Final <i>R</i> indexes<br>[ $I > 2\sigma(I)$ ] | $R_1 = 0.0345$ ,<br>$wR_2 = 0.0928$                                          | $R_1 = 0.0624$ ,<br>$wR_2 = 0.1505$                                          |
| Final <i>R</i> indexes [all data]              | $R_1 = 0.0367$ ,<br>$wR_2 = 0.0946$                                          | $R_1 = 0.0819$ ,<br>$wR_2 = 0.1658$                                          |
| Largest diff. peak/hole<br>/ e Å <sup>-3</sup> | 0.38/-0.28                                                                   | 1.04/-0.42                                                                   |

**Table S2.** Bond lengths (Å) for PADTE (**L**).

| <i>o</i> -PADTE      | Bond lengths(Å) | <i>c</i> -PADTE      | Bond lengths(Å) |
|----------------------|-----------------|----------------------|-----------------|
| S1-C7                | 1.7330(16)      | S1-C7                | 1.773(3)        |
| S1-C10               | 1.7261(17)      | S1-C10               | 1.844(4)        |
| O1-C1                | 1.208(2)        | O1-C1                | 1.205(5)        |
| N1-C2                | 1.343(2)        | N1-C2                | 1.350(5)        |
| N1-C6                | 1.328(2)        | N1-C6                | 1.329(5)        |
| C1-C2                | 1.483(2)        | C1-C2                | 1.481(5)        |
| C2-C3                | 1.378(3)        | C2-C3                | 1.379(5)        |
| C3-C4                | 1.384(3)        | C3-C4                | 1.386(5)        |
| C4-C5                | 1.386(2)        | C4-C5                | 1.389(5)        |
| C5-C6                | 1.399(3)        | C5-C7                | 1.463(4)        |
| C5-C7                | 1.462(2)        | C5-C6                | 1.408(5)        |
| C7-C8                | 1.364(2)        | C7-C8                | 1.353(5)        |
| C8-C9                | 1.425(2)        | C8-C9                | 1.422(5)        |
| C9-C10               | 1.374(2)        | C9-C10               | 1.529(5)        |
| C9-C12               | 1.475(2)        | C9-C12               | 1.353(5)        |
| C10-C11              | 1.497(2)        | C10-C10 <sup>1</sup> | 1.450(9)        |
| C12-C12 <sup>1</sup> | 1.344(3)        | C10-C11              | 1.652(7)        |
| C12-C13              | 1.516(2)        | C12-C121             | 1.429(6)        |
| C13-C14              | 1.504(2)        | C12-C13              | 1.505(4)        |
| C14-C13 <sup>1</sup> | 1.504(2)        | C13-C14              | 1.537(4)        |
|                      |                 | C14-C13 <sup>1</sup> | 1.536(4)        |

<sup>1</sup><sub>1-X, +Y, 1/2-Z</sub>

**Table S3.** Bond angles (°) for PADTE (**L**).

| <i>o</i> -PADTE           | Bond angles (°) | <i>c</i> -PADTE           | Bond angles (°) |
|---------------------------|-----------------|---------------------------|-----------------|
| C10-S1-C7                 | 92.60(8)        | C7-S1-C10                 | 92.37(17)       |
| C6-N1-C2                  | 117.33(15)      | C6-N1-C2                  | 116.8(3)        |
| O1-C1-C2                  | 124.27(18)      | O1-C1-C2                  | 124.5(4)        |
| N1-C2-C1                  | 114.74(15)      | N1-C2-C1                  | 113.8(3)        |
| N1-C2-C3                  | 123.06(16)      | N1-C2-C3                  | 123.3(3)        |
| C3-C2-C1                  | 122.19(16)      | C3-C2-C1                  | 122.9(3)        |
| C2-C3-C4                  | 118.69(16)      | C2-C3-C4                  | 119.0(3)        |
| C3-C4-C5                  | 119.75(17)      | C3-C4-C5                  | 119.4(3)        |
| C4-C5-C6                  | 116.80(15)      | C4-C5-C7                  | 123.6(3)        |
| C4-C5-C7                  | 123.12(16)      | C4-C5-C6                  | 116.9(3)        |
| C6-C5-C7                  | 120.05(15)      | C6-C5-C7                  | 119.5(3)        |
| N1-C6-C5                  | 124.32(16)      | C5-C7-S1                  | 121.4(3)        |
| C5-C7-S1                  | 121.89(13)      | C8-C7-S1                  | 112.9(2)        |
| C8-C7-S1                  | 109.78(12)      | C8-C7-C5                  | 125.6(3)        |
| C8-C7-C5                  | 128.17(15)      | C7-C8-C9                  | 115.1(3)        |
| C7-C8-C9                  | 114.66(15)      | C8-C9-C10                 | 112.6(3)        |
| C8-C9-C12                 | 121.06(15)      | C12-C9-C8                 | 127.4(3)        |
| C10-C9-C8                 | 111.62(15)      | C12-C9-C10                | 120.0(3)        |
| C10-C9-C12                | 126.98(15)      | C9-C10-S1                 | 104.2(3)        |
| C9-C10-S1                 | 111.33(12)      | C9-C10-C11                | 107.8(4)        |
| C9-C10-C11                | 129.67(16)      | C101-C10-S1               | 120.0(4)        |
| C11-C10-S1                | 118.88(13)      | C101-C10-C9               | 112.5(3)        |
| C9-C12-C13                | 117.80(14)      | C101-C10-C11              | 104.5(5)        |
| C12 <sup>1</sup> -C12-C9  | 131.20(9)       | C11-C10-S1                | 107.3(3)        |
| C12 <sup>1</sup> -C12-C13 | 110.96(9)       | C9-C12-C12 <sup>1</sup>   | 120.68(19)      |
| C14-C13-C12               | 105.04(15)      | C9-C12-C13                | 128.6(3)        |
| C13 <sup>1</sup> -C14-C13 | 107.8(2)        | C12 <sup>1</sup> -C12-C13 | 110.69(17)      |
|                           |                 | C12-C13-C14               | 105.1(3)        |
|                           |                 | C13 <sup>1</sup> -C14-C13 | 108.4(4)        |
|                           |                 | N1-C6-C5                  | 124.5(3)        |

<sup>1</sup><sub>1-X, +Y, 1/2-Z</sub>

**Table S4.** Crystallographic data summary for *o*-A<sup>1</sup><sub>2</sub>L<sub>3</sub>Zn<sub>2</sub> cage, CCDC 1917232), *c*-A<sup>1</sup><sub>2</sub>L<sub>3</sub>Zn<sub>2</sub> cage, CCDC 1917235).

|                                                | <i>o</i> -A <sup>1</sup> <sub>2</sub> L <sub>3</sub> Zn <sub>2</sub>                                              | <i>c</i> -A <sup>1</sup> <sub>2</sub> L <sub>3</sub> Zn <sub>2</sub>                                            |
|------------------------------------------------|-------------------------------------------------------------------------------------------------------------------|-----------------------------------------------------------------------------------------------------------------|
| Empirical Formula                              | C <sub>193</sub> H <sub>180</sub> F <sub>21</sub> N <sub>28</sub> O <sub>21</sub> S <sub>19</sub> Zn <sub>4</sub> | C <sub>97</sub> H <sub>90</sub> F <sub>12</sub> N <sub>14</sub> O <sub>12</sub> S <sub>10</sub> Zn <sub>2</sub> |
| Formula weight                                 | 4497.26                                                                                                           | 2323.16                                                                                                         |
| Temperature/K                                  | 173(2)                                                                                                            | 173(2)                                                                                                          |
| Crystal system                                 | triclinic                                                                                                         | monoclinic                                                                                                      |
| Space group                                    | <i>P</i> -1                                                                                                       | <i>P</i> 2 <sub>1</sub> /n                                                                                      |
| <i>a</i> (Å)                                   | 17.1885(8)                                                                                                        | 21.3852(6)                                                                                                      |
| <i>b</i> (Å)                                   | 18.1907(8)                                                                                                        | 18.2160(3)                                                                                                      |
| <i>c</i> (Å)                                   | 19.2773(8)                                                                                                        | 28.8807(4)                                                                                                      |
| $\alpha$ (°)                                   | 67.867(4)                                                                                                         | 90                                                                                                              |
| $\beta$ (°)                                    | 83.882(4)                                                                                                         | 91.739(2)                                                                                                       |
| $\gamma$ (°)                                   | 83.880(4)                                                                                                         | 90                                                                                                              |
| <i>V</i> (Å <sup>3</sup> )                     | 5537.0(5)                                                                                                         | 11245.4(4)                                                                                                      |
| <i>Z</i>                                       | 1                                                                                                                 | 4                                                                                                               |
| $\rho_{\text{calc}}/\text{cm}^3$               | 1.349                                                                                                             | 1.372                                                                                                           |
| $\mu/\text{mm}^{-1}$                           | 2.867                                                                                                             | 2.956                                                                                                           |
| <i>F</i> (000)                                 | 2315.0                                                                                                            | 4776.0                                                                                                          |
| 2 $\theta$ range for data collection/°         | 7.114 to 130.068                                                                                                  | 7.018 to 148.59                                                                                                 |
| Reflections collected                          | 33920                                                                                                             | 44414                                                                                                           |
| Independent reflections                        | 18381<br>$R_{\text{int}} = 0.0631$ ,<br>$R_{\text{sigma}} = 0.0744$                                               | 22259<br>$R_{\text{int}} = 0.0368$ ,<br>$R_{\text{sigma}} = 0.0429$                                             |
| Data/restraints/parameters                     | 18381/249/1361                                                                                                    | 22259/98/1330                                                                                                   |
| Goodness-of-fit on $F^2$                       | 1.036                                                                                                             | 1.048                                                                                                           |
| Final <i>R</i> indexes<br>[ $I > 2\sigma(I)$ ] | $R_1 = 0.0951$ ,<br>$wR_2 = 0.2656$                                                                               | $R_1 = 0.0914$ ,<br>$wR_2 = 0.2692$                                                                             |
| Final <i>R</i> indexes [all data]              | $R_1 = 0.1225$ ,<br>$wR_2 = 0.2974$                                                                               | $R_1 = 0.1109$ ,<br>$wR_2 = 0.3000$                                                                             |
| Largest diff. peak/hole<br>/ e Å <sup>-3</sup> | 2.20/-1.97                                                                                                        | 1.18/-0.86                                                                                                      |



**Table S5.** Selected bond lengths (Å) for  $A^1_2L_3Zn_2$  cage.

| $o-A^1_2L_3Zn_2$ | Bond lengths(Å) | $c-A^1_2L_3Zn_2$ | Bond lengths(Å) |
|------------------|-----------------|------------------|-----------------|
| Zn1-N2           | 2.095(6)        | Zn1-N11          | 2.093(4)        |
| Zn1-N11          | 2.122(6)        | Zn1-N2           | 2.118(4)        |
| Zn1-N10          | 2.124(5)        | Zn1-N10          | 2.125(5)        |
| Zn1-N9           | 2.219(5)        | Zn1-N9           | 2.203(4)        |
| Zn1-N12          | 2.294(5)        | Zn1-N3           | 2.267(4)        |
| Zn1-N3           | 2.321(5)        | Zn1-N12          | 2.398(4)        |
| Zn2-N7           | 2.104(6)        | Zn2-N7           | 2.104(5)        |
| Zn2-N5           | 2.109(6)        | Zn2-N5           | 2.111(4)        |
| Zn2-N14          | 2.141(6)        | Zn2-N14          | 2.136(5)        |
| Zn2-N8           | 2.187(5)        | Zn2-N8           | 2.254(4)        |
| Zn2-N13          | 2.331(5)        | Zn2-N4           | 2.272(4)        |
| Zn2-N4           | 2.336(5)        | Zn2-N13          | 2.311(4)        |

**Table S6.** Selected bond angles (°) for  $A^1_2L_3Zn_2$  cage.

| $o-A^1_2L_3Zn_2$ | Bond angles (°) | $c-A^1_2L_3Zn_2$ | Bond angles (°) |
|------------------|-----------------|------------------|-----------------|
| N2-Zn1-N11       | 100.8(2)        | N11-Zn1-N2       | 101.27(16)      |
| N2-Zn1-N10       | 111.3(2)        | N11-Zn1-N10      | 105.45(19)      |
| N11-Zn1-N10      | 104.9(2)        | N2-Zn1-N10       | 100.93(17)      |
| N2-Zn1-N9        | 98.0(2)         | N11-Zn1-N9       | 97.99(16)       |
| N11-Zn1-N9       | 159.7(2)        | N2-Zn1-N9        | 160.51(14)      |
| N10-Zn1-N9       | 75.0(2)         | N10-Zn1-N9       | 76.52(17)       |
| N2-Zn1-N12       | 157.2(2)        | N11-Zn1-N3       | 163.90(18)      |
| N11-Zn1-N12      | 74.7(2)         | N2-Zn1-N3        | 76.15(15)       |
| N10-Zn1-N12      | 91.4(2)         | N10-Zn1-N3       | 90.62(16)       |
| N9-Zn1-N12       | 84.94(18)       | N9-Zn1-N3        | 84.52(14)       |
| N2-Zn1-N3        | 75.1(2)         | N11-Zn1-N12      | 74.68(17)       |
| N11-Zn1-N3       | 89.5(2)         | N2-Zn1-N12       | 95.69(15)       |
| N10-Zn1-N3       | 162.3(2)        | N10-Zn1-N12      | 162.95(16)      |
| N9-Zn1-N3        | 87.88(18)       | N9-Zn1-N12       | 86.53(15)       |
| N12-Zn1-N3       | 82.39(19)       | N3-Zn1-N12       | 89.66(14)       |
| N7-Zn2-N5        | 105.7(2)        | N7-Zn2-N5        | 106.18(17)      |
| N7-Zn2-N14       | 102.5(2)        | N7-Zn2-N14       | 109.29(19)      |
| N5-Zn2-N14       | 100.7(2)        | N5-Zn2-N14       | 100.50(17)      |
| N7-Zn2-N8        | 76.4(2)         | N7-Zn2-N8        | 75.73(17)       |
| N5-Zn2-N8        | 161.3(2)        | N5-Zn2-N8        | 97.06(16)       |
| N14-Zn2-N8       | 96.83(19)       | N14-Zn2-N8       | 159.33(15)      |
| N7-Zn2-N13       | 163.2(2)        | N7-Zn2-N4        | 161.42(17)      |
| N5-Zn2-N13       | 91.2(2)         | N5-Zn2-N4        | 74.82(15)       |
| N14-Zn2-N13      | 74.5(2)         | N14-Zn2-N4       | 88.44(17)       |
| N8-Zn2-N13       | 87.42(18)       | N8-Zn2-N4        | 85.71(15)       |
| N7-Zn2-N4        | 99.4(2)         | N7-Zn2-N13       | 94.88(16)       |
| N5-Zn2-N4        | 75.5(2)         | N5-Zn2-N13       | 158.85(17)      |
| N14-Zn2-N4       | 158.03(19)      | N14-Zn2-N13      | 73.75(16)       |
| N8-Zn2-N4        | 85.8(2)         | N8-Zn2-N13       | 85.96(15)       |
| N13-Zn2-N4       | 83.89(19)       | N4-Zn2-N13       | 84.58(14)       |

Symmetry code: 'x, y, z'; '-x, -y, -z'

**Table S7.** Crystallographic data summary for *o*-A<sup>2</sup>L<sub>3</sub>Cd<sub>2</sub> cage, CCDC 1917234 and *c*-A<sup>2</sup>L<sub>3</sub>Cd<sub>2</sub> cage, CCDC 1917798.

|                                                | <i>o</i> -A <sup>2</sup> L <sub>3</sub> Cd <sub>2</sub>                                                           | <i>c</i> -A <sup>2</sup> L <sub>3</sub> Cd <sub>2</sub>                                                           |
|------------------------------------------------|-------------------------------------------------------------------------------------------------------------------|-------------------------------------------------------------------------------------------------------------------|
| Empirical Formula                              | C <sub>109</sub> H <sub>111</sub> Cd <sub>2</sub> F <sub>12</sub> N <sub>17</sub> O <sub>12</sub> S <sub>10</sub> | C <sub>105</sub> H <sub>105</sub> Cd <sub>2</sub> F <sub>12</sub> N <sub>15</sub> O <sub>12</sub> S <sub>10</sub> |
| Formula weight                                 | 2624.54                                                                                                           | 2542.43                                                                                                           |
| Temperature/K                                  | 150.00(10)                                                                                                        | 150(2)                                                                                                            |
| Crystal system                                 | tetragonal                                                                                                        | triclinic                                                                                                         |
| Space group                                    | <i>P</i> 4 <sub>3</sub> 2 <sub>1</sub> 2                                                                          | <i>P</i> -1                                                                                                       |
| <i>a</i> (Å)                                   | 13.54180(10)                                                                                                      | 17.6556(11)                                                                                                       |
| <i>b</i> (Å)                                   | 13.54180(10)                                                                                                      | 18.0529(12)                                                                                                       |
| <i>c</i> (Å)                                   | 66.0707(8)                                                                                                        | 19.857(2)                                                                                                         |
| $\alpha$ (°)                                   | 90                                                                                                                | 78.743(8)                                                                                                         |
| $\beta$ (°)                                    | 90                                                                                                                | 75.912(8)                                                                                                         |
| $\gamma$ (°)                                   | 90                                                                                                                | 79.512(5)                                                                                                         |
| <i>V</i> (Å <sup>3</sup> )                     | 12116.1(2)                                                                                                        | 5960.2(9)                                                                                                         |
| <i>Z</i>                                       | 4                                                                                                                 | 2                                                                                                                 |
| $\rho_{\text{calc}}/\text{cm}^3$               | 1.439                                                                                                             | 1.417                                                                                                             |
| $\mu/\text{mm}^{-1}$                           | 5.122                                                                                                             | 5.182                                                                                                             |
| <i>F</i> (000)                                 | 5376.0                                                                                                            | 2600.0                                                                                                            |
| $2\theta$ range for data collection/°          | 6.662 to 146.892                                                                                                  | 6.994 to 117.868                                                                                                  |
| Reflections collected                          | 33381                                                                                                             | 17052                                                                                                             |
| Independent reflections                        | 11878<br>$R_{\text{int}} = 0.0435$ ,<br>$R_{\text{sigma}} = 0.0407$                                               | 17052<br>$R_{\text{int}} = 0.1188$ ,<br>$R_{\text{sigma}} = 0.1296$                                               |
| Data/restraints/parameters                     | 11878/302/756                                                                                                     | 17052/1537/1412                                                                                                   |
| Goodness-of-fit on $F^2$                       | 1.024                                                                                                             | 1.034                                                                                                             |
| Final <i>R</i> indexes<br>[ $I > 2\sigma(I)$ ] | $R_1 = 0.0978$ ,<br>$wR_2 = 0.2610$                                                                               | $R_1 = 0.1205$ ,<br>$wR_2 = 0.02045$                                                                              |
| Final <i>R</i> indexes [all data]              | $R_1 = 0.1046$ ,<br>$wR_2 = 0.2706$                                                                               | $R_1 = 0.2064$ ,<br>$wR_2 = 0.2296$                                                                               |
| Largest diff. peak/hole<br>/ e Å <sup>-3</sup> | 4.61/-1.94                                                                                                        | 0.97/-1.00                                                                                                        |

**Table S8.** Selected bond lengths (Å) for  $A^2L_3Cd_2$  cage.

| $o-A^2L_3Cd_2$ | Bond lengths(Å) | $c-A^2L_3Cd_2$ | Bond lengths(Å) |
|----------------|-----------------|----------------|-----------------|
| Cd1-N1         | 2.464(9)        | Cd1-N1         | 2.338(13)       |
| Cd1-N2         | 2.329(10)       | Cd1-N9         | 2.366(14)       |
| Cd1-N3         | 2.502(9)        | Cd1-N7         | 2.424(14)       |
| Cd1-N4         | 2.352(9)        | Cd1-N10        | 2.438(13)       |
| Cd1-N5         | 2.462(10)       | Cd1-N14        | 2.536(13)       |
| Cd1-N6         | 2.334(10)       | Cd1-N2         | 2.547(10)       |
| Cd1-N7         | 2.456(11)       | Cd1-N1         | 2.338(13)       |
|                |                 | Cd2-N4         | 2.339(15)       |
|                |                 | Cd2-N12        | 2.345(12)       |
|                |                 | Cd2-N5         | 2.351(16)       |
|                |                 | Cd2-N6         | 2.430(15)       |
|                |                 | Cd2-N3         | 2.444(13)       |
|                |                 | Cd2-N13        | 2.454(17)       |
|                |                 | Cd2-N11        | 2.513(17)       |

**Table S9.** Selected bond angles (°) for A<sup>2</sup>L<sub>3</sub>Cd<sub>2</sub> cage.

| <i>o</i> -A <sup>2</sup> L <sub>3</sub> Cd <sub>2</sub> | Bond angles (°) | <i>c</i> -A <sup>2</sup> L <sub>3</sub> Cd <sub>2</sub> | Bond angles (°) |
|---------------------------------------------------------|-----------------|---------------------------------------------------------|-----------------|
| N1-Cd1-N3                                               | 130.7(3)        | N8-Cd1-N1                                               | 118.8(5)        |
| N2-Cd1-N1                                               | 80.2(3)         | N8-Cd1-N9                                               | 119.7(5)        |
| N2-Cd1-N3                                               | 68.6(3)         | N1-Cd1-N9                                               | 111.0(6)        |
| N2-Cd1-N4                                               | 117.6(3)        | N8-Cd1-N7                                               | 70.4(5)         |
| N2-Cd1-N5                                               | 81.9(3)         | N1-Cd1-N7                                               | 151.4(4)        |
| N2-Cd1-N6                                               | 114.1(4)        | N9-Cd1-N7                                               | 82.0(5)         |
| N2-Cd1-N7                                               | 148.4(4)        | N8-Cd1-N10                                              | 147.9(5)        |
| N4-Cd1-N1                                               | 79.3(3)         | N1-Cd1-N10                                              | 80.1(5)         |
| N4-Cd1-N3                                               | 149.0(3)        | N9-Cd1-N10                                              | 69.1(4)         |
| N4-Cd1-N5                                               | 68.6(3)         | N7-Cd1-N10                                              | 81.3(5)         |
| N4-Cd1-N7                                               | 82.1(3)         | N8-Cd1-N14                                              | 77.9(5)         |
| N5-Cd1-N1                                               | 129.9(3)        | N1-Cd1-N14                                              | 79.0(5)         |
| N5-Cd1-N3                                               | 83.3(3)         | N9-Cd1-N14                                              | 80.4(5)         |
| N6-Cd1-N1                                               | 80.1(4)         | N7-Cd1-N14                                              | 129.2(5)        |
| N6-Cd1-N3                                               | 79.2(3)         | N10-Cd1-N14                                             | 133.4(5)        |
| N6-Cd1-N4                                               | 119.3(4)        | N8-Cd1-N2                                               | 82.6(4)         |
| N6-Cd1-N5                                               | 149.3(4)        | N1-Cd1-N2                                               | 69.8(5)         |
| N6-Cd1-N7                                               | 69.4(4)         | N9-Cd1-N2                                               | 148.5(4)        |
| N7-Cd1-N1                                               | 129.9(4)        | N7-Cd1-N2                                               | 85.9(4)         |
| N7-Cd1-N3                                               | 82.0(3)         | N10-Cd1-N2                                              | 80.5(4)         |
| N7-Cd1-N5                                               | 83.4(4)         | N14-Cd1-N2                                              | 128.6(5)        |
|                                                         |                 | N4-Cd2-N12                                              | 125.3(6)        |
|                                                         |                 | N4-Cd2-N5                                               | 117.9(5)        |
|                                                         |                 | N12-Cd2-N5                                              | 106.6(5)        |
|                                                         |                 | N4-Cd2-N6                                               | 80.6(6)         |
|                                                         |                 | N12-Cd2-N6                                              | 148.0(6)        |
|                                                         |                 | N5-Cd2-N6                                               | 69.0(5)         |
|                                                         |                 | N4-Cd2-N3                                               | 69.0(5)         |
|                                                         |                 | N12-Cd2-N3                                              | 87.0(4)         |
|                                                         |                 | N5-Cd2-N3                                               | 151.5(6)        |
|                                                         |                 | N6-Cd2-N3                                               | 86.1(5)         |
|                                                         |                 | N4-Cd2-N13                                              | 79.3(5)         |

|             |          |
|-------------|----------|
| N12-Cd2-N13 | 79.7(5)  |
| N5-Cd2-N13  | 79.0(6)  |
| N6-Cd2-N13  | 127.7(5) |
| N3-Cd2-N13  | 128.8(6) |
| N4-Cd2-N11  | 145.1(5) |
| N12-Cd2-N11 | 69.2(6)  |
| N5-Cd2-N11  | 80.1(5)  |
| N6-Cd2-N11  | 79.0(5)  |
| N3-Cd2-N11  | 81.7(4)  |
| N13-Cd2-N11 | 135.3(4) |

Symmetry code: 'x, y, z'; '-x, -y, -z'

**Table S10.** DOSY data and calculated solvodynamic radii for cages.

| Cages                                                                | log D | D [ $\times 10^{-10} \text{ m}^2 \text{ s}^{-1}$ ] | r [Å] |
|----------------------------------------------------------------------|-------|----------------------------------------------------|-------|
| <i>o</i> -A <sup>1</sup> <sub>2</sub> L <sub>3</sub> Zn <sub>2</sub> | -9.20 | 6.31                                               | 9.4   |
| <i>c</i> -A <sup>1</sup> <sub>2</sub> L <sub>3</sub> Zn <sub>2</sub> | -9.09 | 8.13                                               | 7.3   |
| <i>o</i> -A <sup>2</sup> <sub>2</sub> L <sub>3</sub> Zn <sub>2</sub> | -9.13 | 7.41                                               | 8.0   |
| <i>c</i> -A <sup>2</sup> <sub>2</sub> L <sub>3</sub> Zn <sub>2</sub> | -9.15 | 7.08                                               | 8.3   |
| <i>o</i> -A <sup>2</sup> <sub>2</sub> L <sub>3</sub> Cd <sub>2</sub> | -9.05 | 8.91                                               | 6.6   |
| <i>c</i> -A <sup>2</sup> <sub>2</sub> L <sub>3</sub> Cd <sub>2</sub> | -9.07 | 8.51                                               | 6.9   |
| <i>o</i> -R-A <sup>1</sup> <sub>2</sub> L <sub>3</sub>               | -9.42 | 3.80                                               | 9.6   |
| <i>c</i> -R-A <sup>1</sup> <sub>2</sub> L <sub>3</sub>               | -9.45 | 3.55                                               | 10.2  |
| <i>o</i> -R-A <sup>2</sup> <sub>2</sub> L <sub>3</sub>               | -9.20 | 6.31                                               | 5.8   |
| <i>c</i> -R-A <sup>2</sup> <sub>2</sub> L <sub>3</sub>               | -9.18 | 6.61                                               | 5.5   |

Note: Stokes-Einstein equation

$$D = \frac{k_B T}{6\pi\eta r}$$

was applied to estimate the dynamic radius for the cages. In which,  $D$  is diffusion coefficient obtained from DOSY spectra,  $k_B$  is Boltzmann constant,  $T$  is temperature 298 K,  $\eta$  is dynamic viscosity of CD<sub>3</sub>CN ( $3.7 \times 10^{-4} \text{ Pa s}^{-1}$ ) or CD<sub>3</sub>OD ( $6.0 \times 10^{-4} \text{ Pa s}^{-1}$ ), and  $r$  is the estimated dynamic radius.

**Table S11.** Crystallographic data summary for *o*-R-A<sup>1</sup><sub>2</sub>L<sub>3</sub> (CCDC 1922928).

|                                                                 | <i>o</i> -R-A <sup>1</sup> <sub>2</sub> L <sub>3</sub>                  |
|-----------------------------------------------------------------|-------------------------------------------------------------------------|
| Empirical Formula                                               | C <sub>93</sub> H <sub>102</sub> N <sub>14</sub> S <sub>6</sub>         |
| Formula weight                                                  | 1608.24                                                                 |
| Temperature/K                                                   | 149.99(10)                                                              |
| Crystal system                                                  | monoclinic                                                              |
| Space group                                                     | <i>P</i> 2 <sub>1</sub> / <i>c</i>                                      |
| <i>a</i> (Å)                                                    | 21.0570(9)                                                              |
| <i>b</i> (Å)                                                    | 15.0503(3)                                                              |
| <i>c</i> (Å)                                                    | 34.322(3)                                                               |
| $\alpha$ (°)                                                    | 90                                                                      |
| $\beta$ (°)                                                     | 90.522(6)                                                               |
| $\gamma$ (°)                                                    | 90                                                                      |
| <i>V</i> (Å <sup>3</sup> )                                      | 10876.7(11)                                                             |
| <i>Z</i>                                                        | 4                                                                       |
| $\rho_{\text{calc}}$ /cm <sup>3</sup>                           | 0.982                                                                   |
| $\mu$ /mm <sup>-1</sup>                                         | 1.496                                                                   |
| <i>F</i> (000)                                                  | 3416.0                                                                  |
| <i>2</i> $\theta$ range for data collection/°                   | 5.15 to 122.336                                                         |
| Reflections collected                                           | 83143                                                                   |
|                                                                 | 16130                                                                   |
| Independent reflections                                         | <i>R</i> <sub>int</sub> = 0.1042,<br><i>R</i> <sub>sigma</sub> = 0.0543 |
| Data/restraints/parameters                                      | 16130/1097/989                                                          |
| Goodness-of-fit on <i>F</i> <sup>2</sup>                        | 0.906                                                                   |
| Final <i>R</i> indexes<br>[ <i>I</i> > 2 $\sigma$ ( <i>I</i> )] | <i>R</i> <sub>1</sub> = 0.2016,<br><i>wR</i> <sub>2</sub> = 0.4995      |
| Final <i>R</i> indexes [all data]                               | <i>R</i> <sub>1</sub> = 0.2304,<br><i>wR</i> <sub>2</sub> = 0.5148      |
| Largest diff. peak/hole<br>/ e Å <sup>-3</sup>                  | 1.50/-0.65                                                              |

**Table S12.** Bond lengths (Å) for *o*-R-A<sup>1</sup><sub>2</sub>L<sub>3</sub>.

| <i>o</i> -R-A <sup>1</sup> <sub>2</sub> L <sub>3</sub> | Bond lengths(Å) | <i>o</i> -R-A <sup>1</sup> <sub>2</sub> L <sub>3</sub> | Bond lengths(Å) |
|--------------------------------------------------------|-----------------|--------------------------------------------------------|-----------------|
| S1-C9                                                  | 1.724(15)       | N6-C31                                                 | 1.53(3)         |
| S1-C12                                                 | 1.774(16)       | N6-C62                                                 | 1.454(9)        |
| S2-C20                                                 | 1.769(18)       | N6-C93                                                 | 1.464(9)        |
| S2-C23                                                 | 1.762(17)       | N7-C33                                                 | 1.49(2)         |
| S3-C40                                                 | 1.686(15)       | N7-C34                                                 | 1.51(2)         |
| S3-C43                                                 | 1.664(18)       | N9-C57                                                 | 1.39            |
| S4-C51                                                 | 1.718(16)       | N9-C56                                                 | 1.39            |
| S4-C54                                                 | 1.781(16)       | N10-C60                                                | 1.385(10)       |
| S5-C71                                                 | 1.725(11)       | N10-C61                                                | 1.437(9)        |
| S5-C74                                                 | 1.751(11)       | N11-C64                                                | 1.477(16)       |
| S6-C82                                                 | 1.689(13)       | N11-C65                                                | 1.437(16)       |
| S6-C85                                                 | 1.719(13)       | N12-C66                                                | 1.413(16)       |
| N1-C1                                                  | 1.40(2)         | N12-C67                                                | 1.415(17)       |
| N1-C32                                                 | 1.39(2)         | N14-C91                                                | 1.50(2)         |
| N1-C63                                                 | 1.500(19)       | N14-C92                                                | 1.45(2)         |
| N2-C2                                                  | 1.455(18)       | N3-C5                                                  | 1.39            |
| N2-C3                                                  | 1.381(19)       | C35-N8                                                 | 1.29(2)         |
| N4-C25                                                 | 1.32(2)         | N8-C39                                                 | 1.39(2)         |
| N4-C26                                                 | 1.302(19)       | C88-N13                                                | 1.39            |
| N5-C29                                                 | 1.50(2)         | N13-C87                                                | 1.39            |
| N5-C30                                                 | 1.46(2)         |                                                        |                 |



**Table S13.** Bond angles (°) for *o*-R-A<sup>1</sup><sub>2</sub>L<sub>3</sub>.

| <i>o</i> -R-A <sup>1</sup> <sub>2</sub> L <sub>3</sub> | Bond angles (°) | <i>o</i> -R-A <sup>1</sup> <sub>2</sub> L <sub>3</sub> | Bond angles (°) |
|--------------------------------------------------------|-----------------|--------------------------------------------------------|-----------------|
| C9-S1-C12                                              | 91.5(7)         | N4-C26-C27                                             | 121.8(16)       |
| C23-S2-C20                                             | 88.7(9)         | N4-C26-C29                                             | 118.2(16)       |
| C43-S3-C40                                             | 94.1(8)         | C26-C29-N5                                             | 110.9(15)       |
| C51-S4-C54                                             | 92.6(8)         | C31-C30-N5                                             | 113.2(19)       |
| C71-S5-C74                                             | 94.4(6)         | C30-C31-N6                                             | 116.2(18)       |
| C82-S6-C85                                             | 91.6(6)         | N1-C32-C33                                             | 112.0(15)       |
| C1-N1-C63                                              | 110.8(14)       | C32-C33-N7                                             | 109.6(16)       |
| C32-N1-C1                                              | 109.5(13)       | C35-C34-N7                                             | 112.9(18)       |
| C32-N1-C63                                             | 114.1(14)       | N8-C35-C34                                             | 114.3(18)       |
| C3-N2-C2                                               | 113.0(13)       | N8-C35-C36                                             | 120(2)          |
| C26-N4-C25                                             | 119.5(16)       | C35-N8-C39                                             | 119.3(16)       |
| C30-N5-C29                                             | 114.5(15)       | C50-C51-S4                                             | 108.4(12)       |
| C62-N6-C31                                             | 114.4(17)       | C52-C51-S4                                             | 121.3(13)       |
| C62-N6-C93                                             | 112.5(9)        | C55-C54-S4                                             | 118.8(11)       |
| C93-N6-C31                                             | 115.5(17)       | C53-C54-S4                                             | 106.1(12)       |
| C33-N7-C34                                             | 113.8(16)       | N10-C60-C57                                            | 111.6(16)       |
| C57-N9-C56                                             | 120             | N10-C61-C62                                            | 101.8(15)       |
| N9-C57-C58                                             | 120             | N6-C62-C61                                             | 118.0(16)       |
| N9-C57-C60                                             | 127.2(11)       | N1-C63-C64                                             | 108.8(13)       |
| C55-C56-N9                                             | 120             | N11-C64-C63                                            | 111.3(12)       |
| C60-N10-C61                                            | 112.1(16)       | N11-C65-C66                                            | 113.5(11)       |
| C65-N11-C64                                            | 112.2(11)       | N12-C66-C65                                            | 121.5(11)       |
| C66-N12-C67                                            | 119.1(11)       | C70-C66-N12                                            | 120.0(12)       |
| C92-N14-C91                                            | 107.8(15)       | N12-C67-C68                                            | 118.5(11)       |
| N1-C1-C2                                               | 110.7(14)       | C68-C71-S5                                             | 123.0(8)        |
| N2-C2-C1                                               | 108.4(13)       | C72-C71-S5                                             | 109.6(9)        |
| N2-C3-C4                                               | 111.8(12)       | C73-C74-S5                                             | 107.4(9)        |
| N3-C4-C3                                               | 124.4(9)        | C75-C74-S5                                             | 122.8(9)        |
| N3-C4-C8                                               | 120             | C81-C82-S6                                             | 111.7(9)        |
| C4-N3-C5                                               | 120             | C83-C82-S6                                             | 120.0(9)        |
| N3-C5-C6                                               | 120             | C84-C85-S6                                             | 110.3(10)       |
| C6-C9-S1                                               | 120.1(10)       | C86-C85-S6                                             | 119.5(9)        |

|            |           |             |           |
|------------|-----------|-------------|-----------|
| C10-C9-S1  | 113.1(11) | N13-C88-C89 | 120       |
| C11-C12-S1 | 108.9(11) | N13-C88-C91 | 117.2(10) |
| C13-C12-S1 | 118.1(12) | C88-N13-C87 | 120       |
| C19-C20-S2 | 111.9(13) | N13-C87-C86 | 120       |
| C21-C20-S2 | 114.1(14) | C88-C91-N14 | 110.7(13) |
| C22-C23-S2 | 111.9(13) | N14-C92-C93 | 107.4(17) |
| C24-C23-S2 | 119.6(14) | N6-C93-C92  | 113.8(16) |
| N4-C25-C24 | 122.6(16) | C38-C39-N8  | 123.0(16) |

---

## 2.7 Er-1, Er-5, Er-9

Macroporous  $\text{ZrO}_2\text{:Er(III)-Yb(III)}$  materials with different Er/Yb molar ratios (1:1, 1:5, 1:9 for samples Er-1, Er-5, Er-9, respectively) were prepared by sol-gel method combined with polystyrene (PS) sphere templating technique.<sup>[S2]</sup> Appropriate amounts of  $\text{Er}(\text{NO}_3)_3$  and  $\text{Yb}(\text{NO}_3)_3$  were added into the methanol solution of Zr(IV)-polyacetylacetonate under stirring, and then dripped onto PS templates. The products were dried in air at room temperature for 24 h, then annealed at 900 °C for 5 h.

## 3. Study of photochromic process of PADTE ligand and cages

### 3.1 PADTE ligand

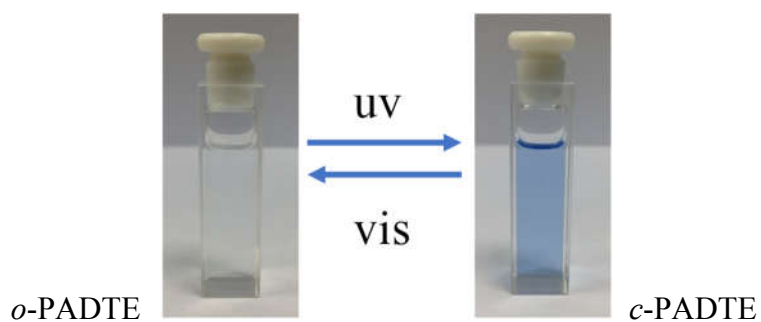

**Figure S35.** Color change of PADTE ligand in  $\text{CH}_3\text{CN}/\text{CHCl}_3$  (v:v = 1:1,  $1 \times 10^{-5}$  mol  $\text{L}^{-1}$ ) solution by UV/Vis irradiation.

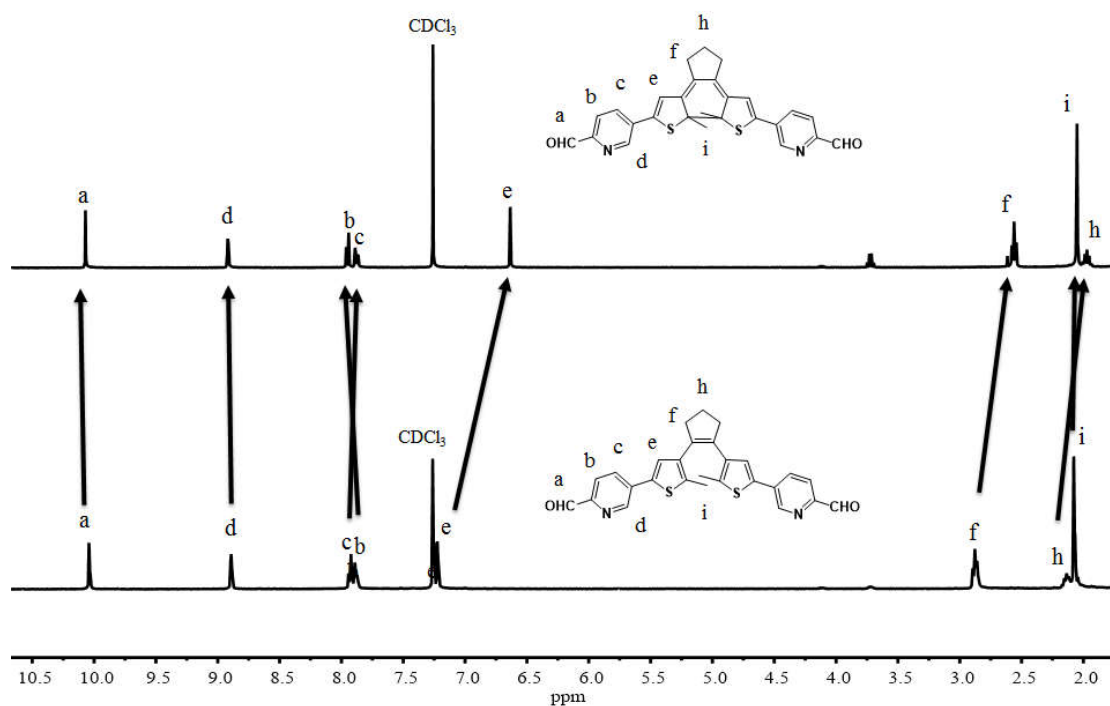

**Figure S36.**  $^1\text{H}$  NMR comparison of *o*- and *c*-PADTE ligand ( $\text{CDCl}_3$ , 25 °C ).

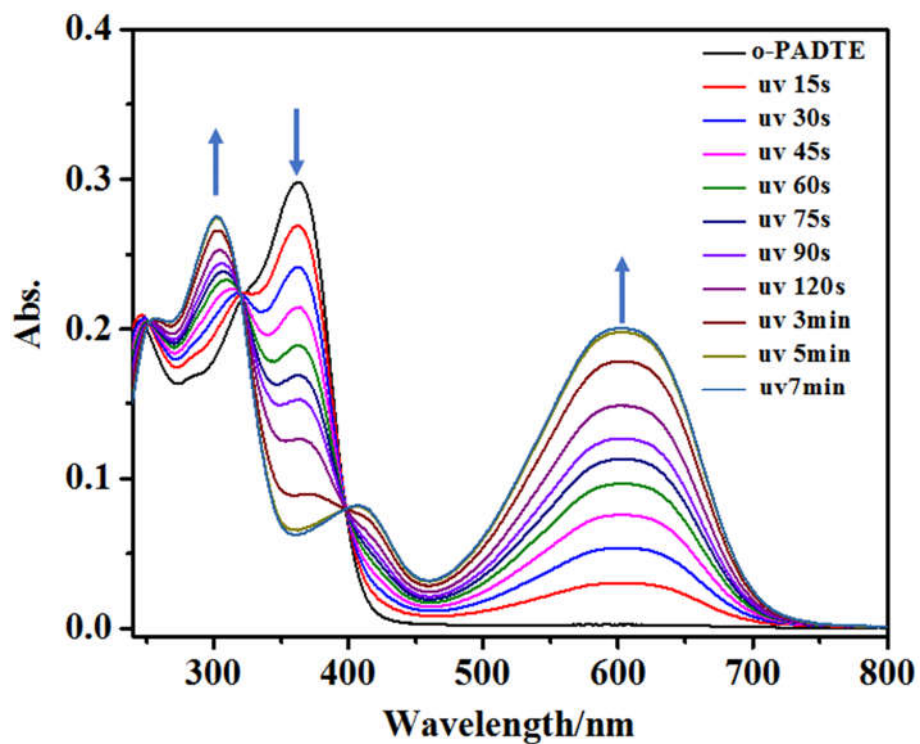

**Figure S37.** UV-Vis spectra of *o*-PADTE ligand during ring-closing process under UV irradiation for different time ( $\text{CH}_3\text{CN}/\text{CHCl}_3$ , v:v=1:1,  $1 \times 10^{-5}$  mol  $\text{L}^{-1}$ , room temperature).

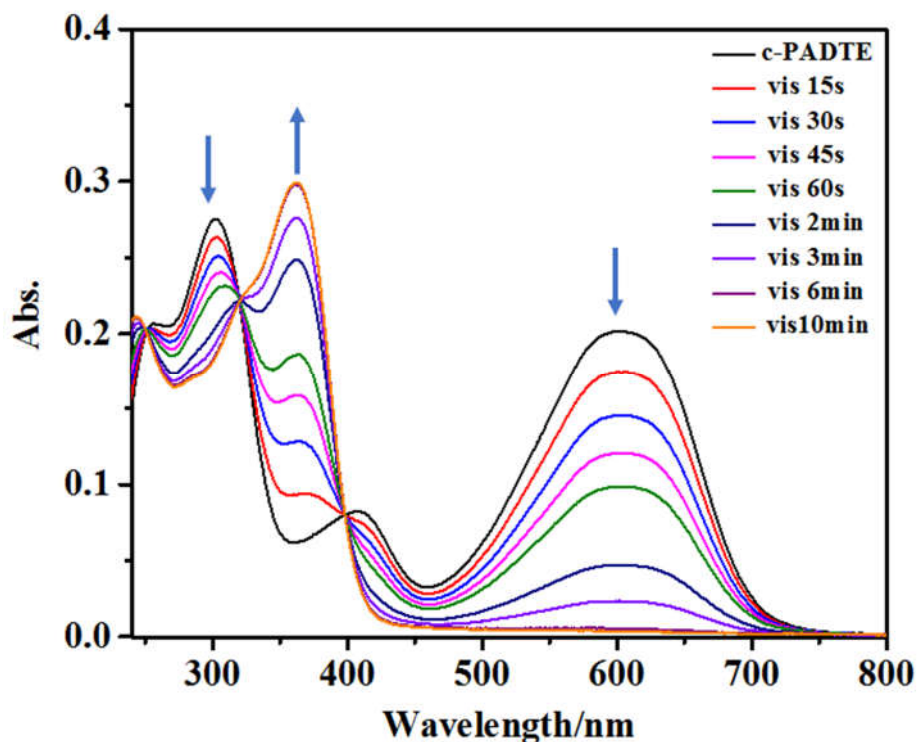

**Figure S38.** UV-Vis spectra of *c*-PADTE ligand during ring-opening process under visible irradiation for different time ( $\text{CH}_3\text{CN}/\text{CHCl}_3$ ,  $v:v=1:1$ ,  $1 \times 10^{-5} \text{ mol L}^{-1}$ , room temperature).

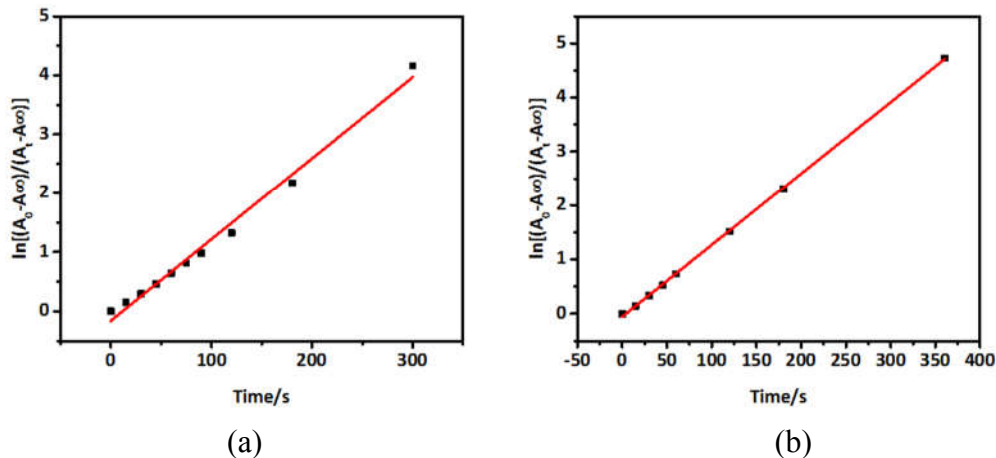

**Figure S39.** (a) Plot of  $\ln[(A_0 - A_\infty)/(A_t - A_\infty)]$  with time for UV-Vis absorption of *o*-PADTE ligand during ring-closing process, and (b) *c*-PADTE ligand during ring-opening process ( $\text{CH}_3\text{CN}/\text{CHCl}_3$ ,  $v:v = 1:1$ ,  $1 \times 10^{-5} \text{ mol L}^{-1}$ , room temperature).

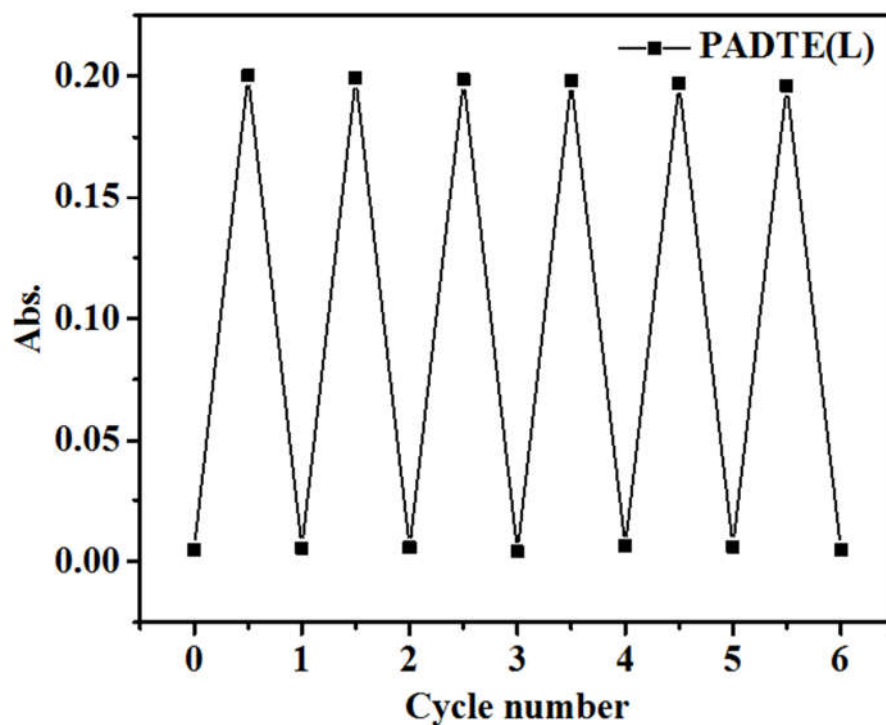

**Figure S40.** Cycled signals for absorbance at 605 nm of PADTE during alternative ring-closing/ring-opening processes

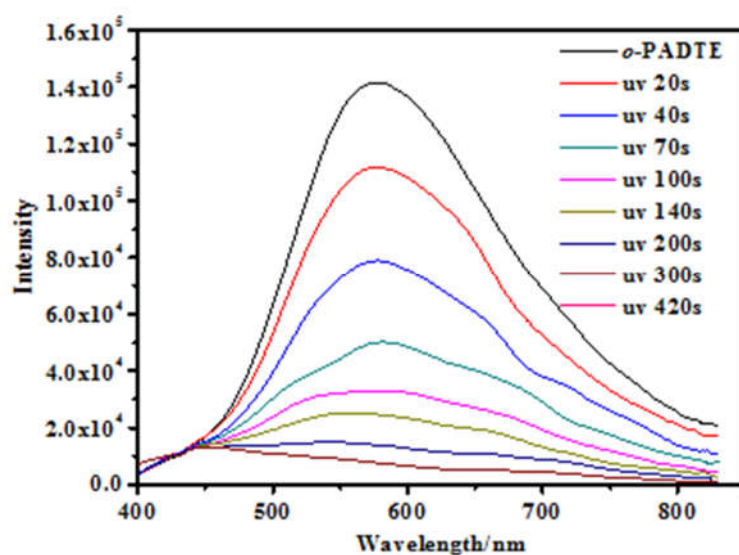

**Figure S41.** Emission spectra of *o*-PADTE ligand during ring-closing process ( $\text{CH}_3\text{CN}/\text{CHCl}_3$ ,  $v:v = 1:1$ ,  $1 \times 10^{-5} \text{ mol L}^{-1}$ , room temperature).

### 3.2 $A^1_2L_3Zn_2$ cage

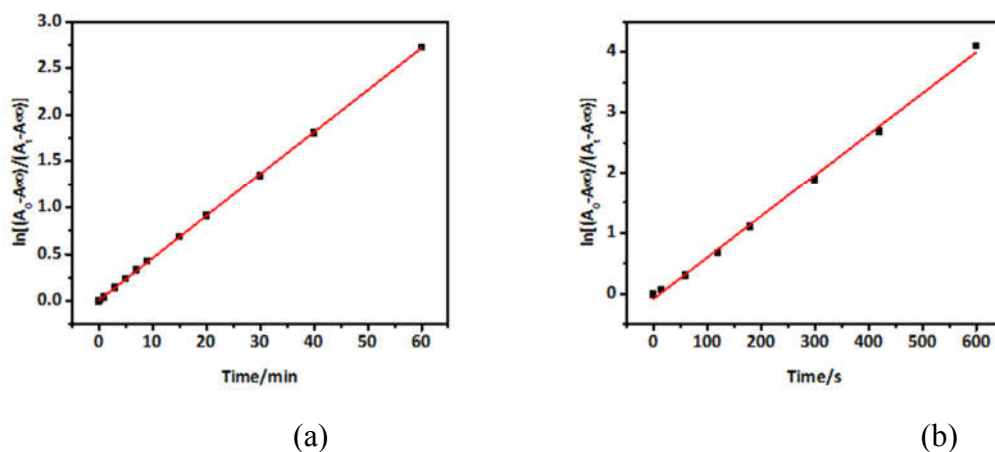

**Figure S42.** (a) Plot of  $\ln[(A_0 - A_\infty)/(A_t - A_\infty)]$  with time for UV-Vis absorption of  $o$ - $A^1_2L_3Zn_2$  cage during ring-closing process, and (b)  $c$ - $A^1_2L_3Zn_2$  cage during ring-opening process ( $CH_3CN/CHCl_3$ , v:v = 1:1,  $1 \times 10^{-5}$  mol  $L^{-1}$ , room temperature).

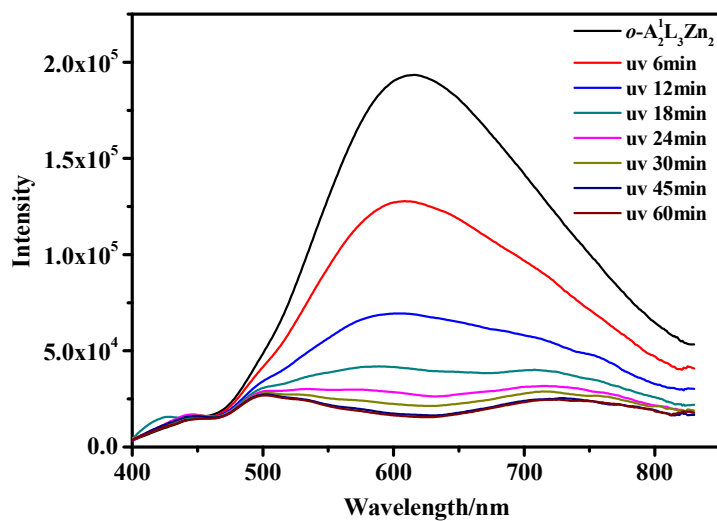

**Figure S43.** The emission spectra of  $o$ - $A^1_2L_3Zn_2$  cage during ring-closing process ( $CH_3CN/CHCl_3$ , v:v = 1:1,  $1 \times 10^{-5}$  mol  $L^{-1}$ , room temperature).

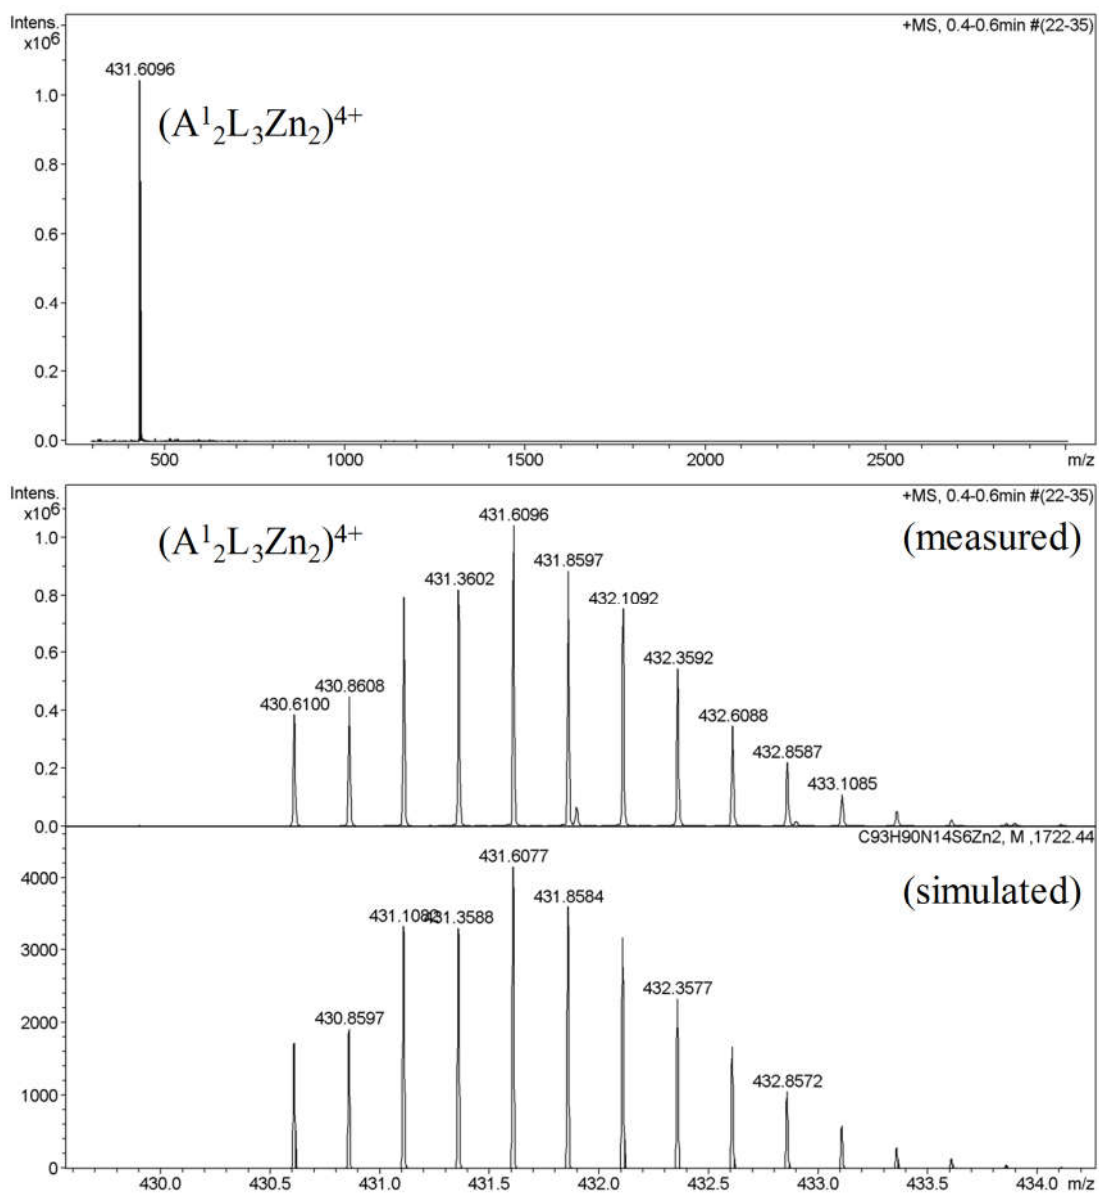

**Figure S44.** High resolution ESI-MS spectra of  $c\text{-A}_{12}\text{L}_3\text{Zn}_2$  cage ( $\text{CH}_3\text{CN}$ , room temperature).



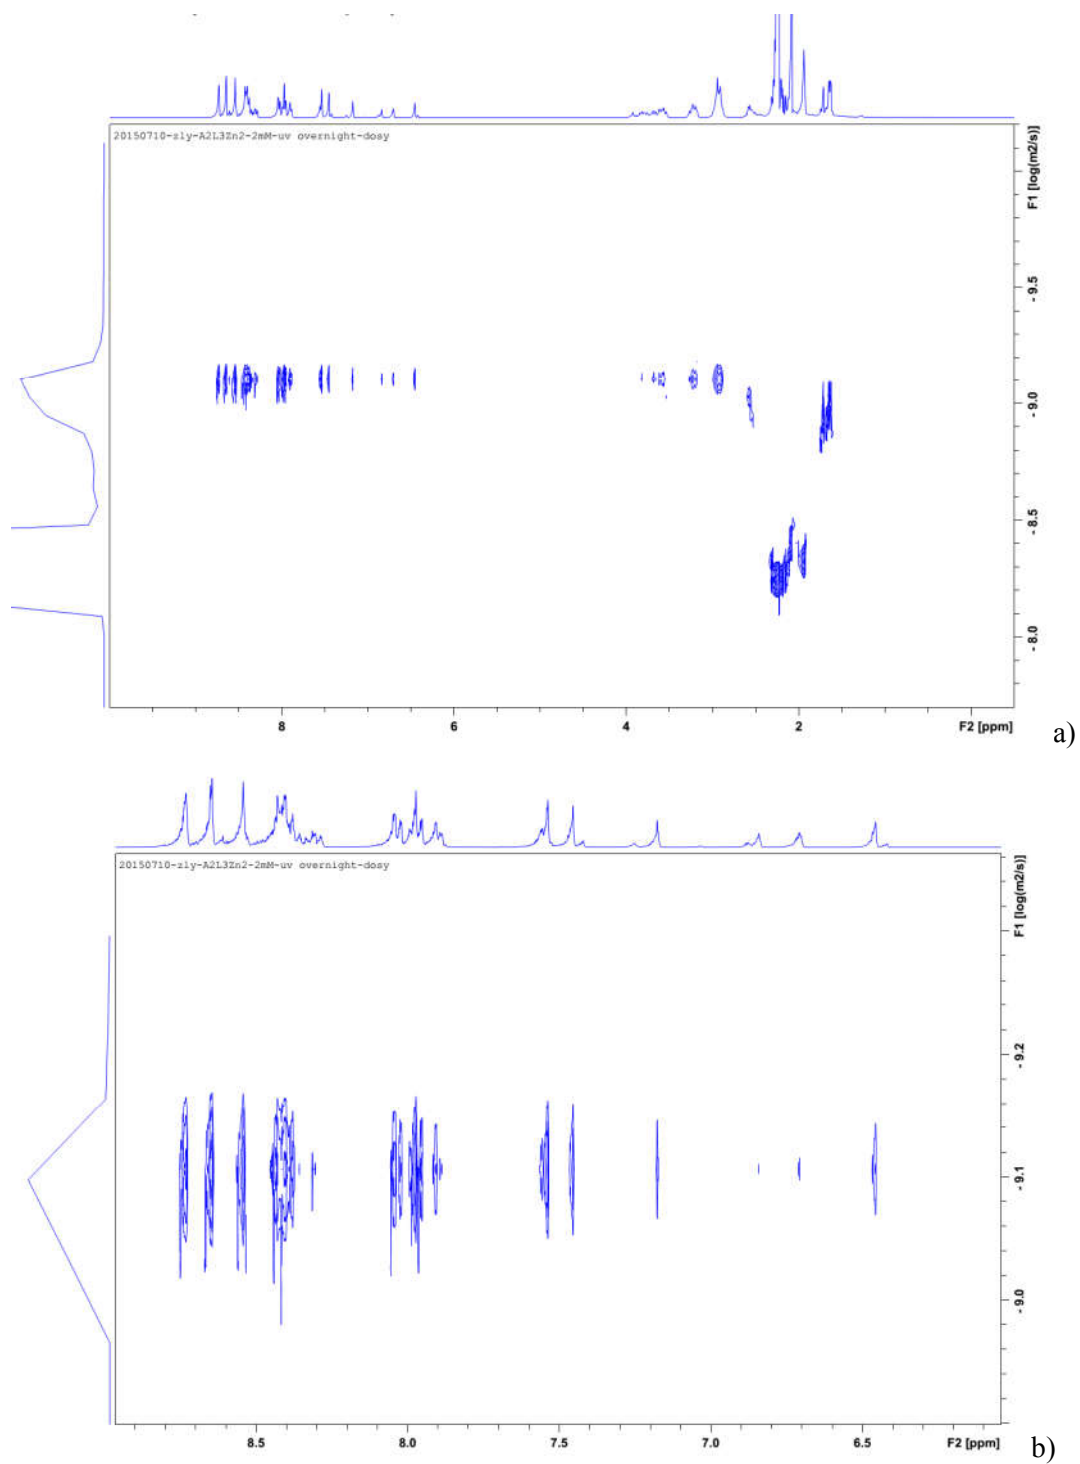

**Figure S45.** (a) DOSY and (b) its partial enlargement spectra of *c*-A<sup>1</sup><sub>2</sub>L<sub>3</sub>Zn<sub>2</sub> cage (CD<sub>3</sub>CN, room temperature).

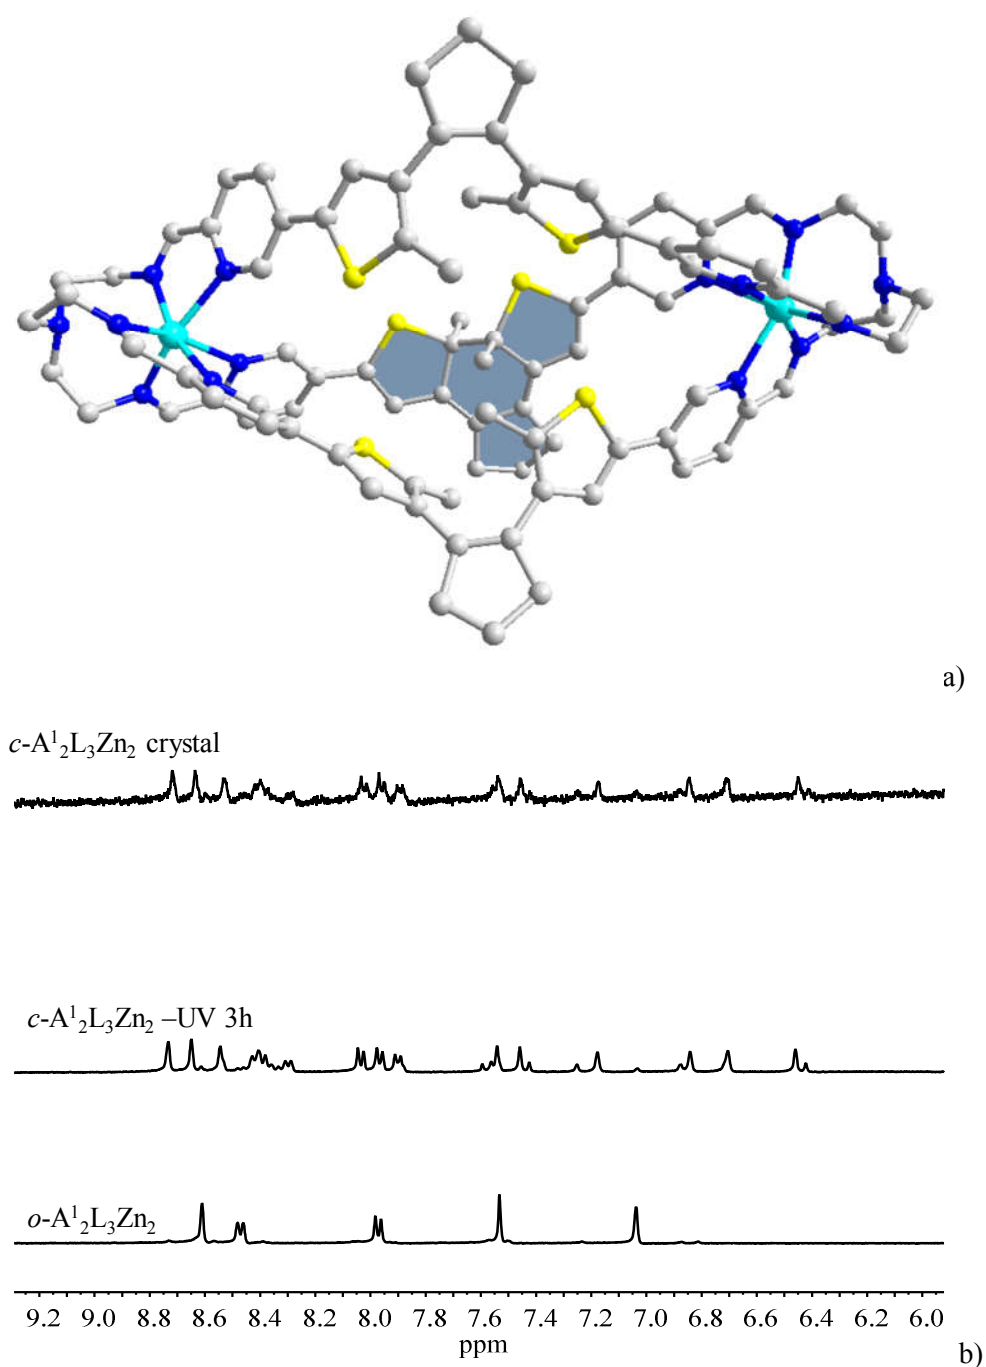

**Figure S46.** (a) Single-crystal structure of  $c\text{-A}^1_2\text{L}_3\text{Zn}_2$  cage (grey for C, blue for N, yellow for S, cyan for Zn, the closed PADTE-moiety is shown in shadow, H atoms, solvents and counter anions are omitted for clarity). (b) NMR spectra ( $\text{CD}_3\text{CN}$ , room temperature) for the crystallized sample of  $c\text{-A}^1_2\text{L}_3\text{Zn}_2$  cage (top), and the solution sample of  $o\text{-A}^1_2\text{L}_3\text{Zn}_2$  cage before (bottom) and after UV irradiation for 3 hours (middle).

### 3.3 A<sup>2</sup>L<sub>3</sub>Cd<sub>2</sub> cage

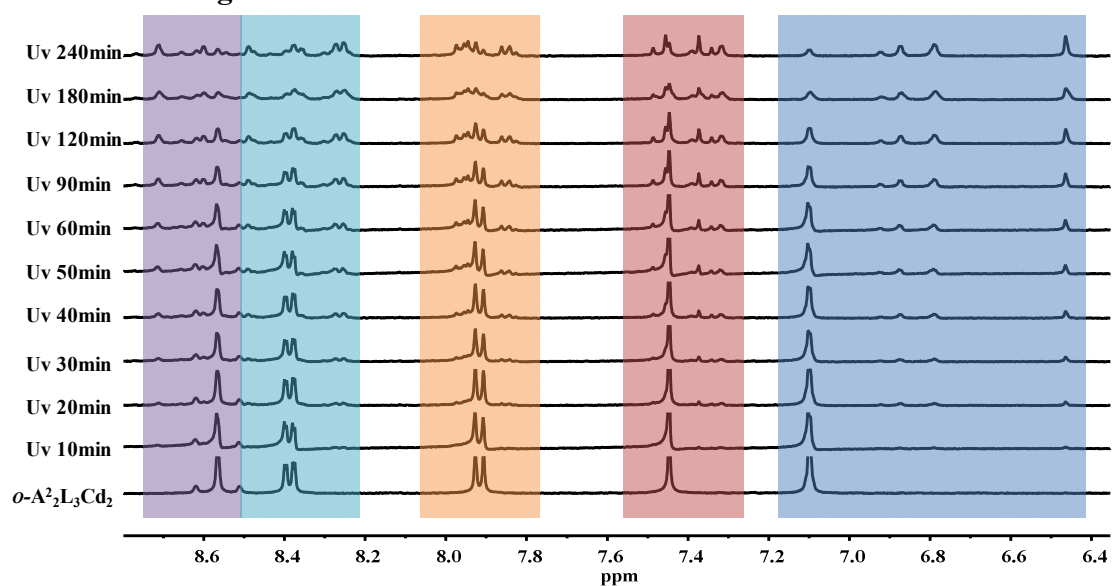

**Figure S47.** <sup>1</sup>H NMR spectra evolution of *o*-A<sup>2</sup>L<sub>3</sub>Cd<sub>2</sub> cage under UV irradiation for different time (400 MHz, CD<sub>3</sub>CN, 298 K).

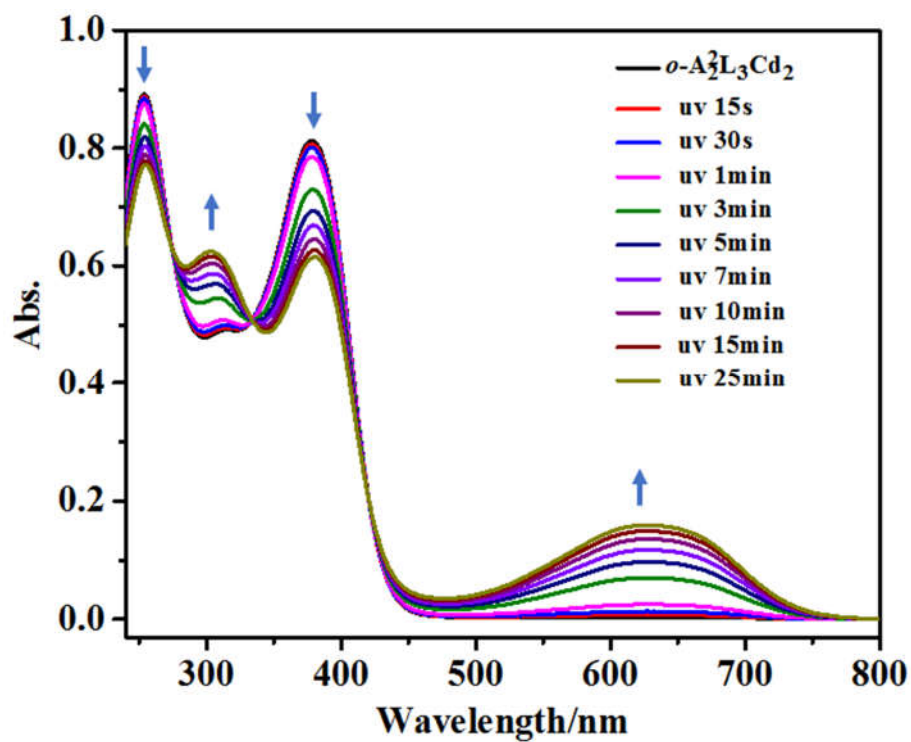

**Figure S48.** UV-Vis spectra of *o*-A<sup>2</sup>L<sub>3</sub>Cd<sub>2</sub> cage during ring-closing process (CH<sub>3</sub>CN/CHCl<sub>3</sub>, v:v = 1:1, 1×10<sup>-5</sup> mol L<sup>-1</sup>, room temperature).

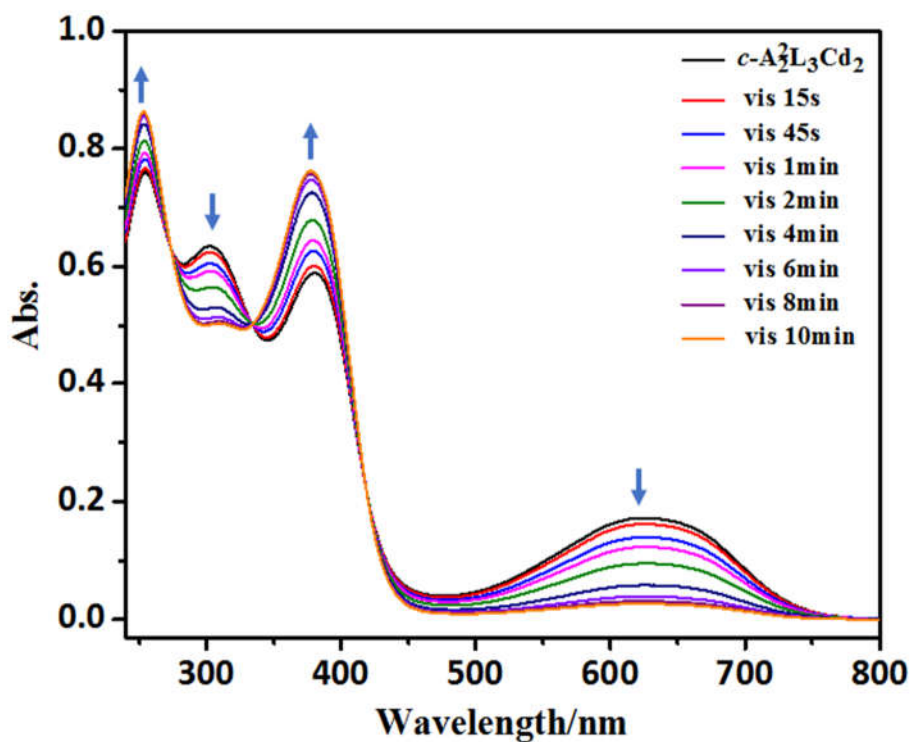

**Figure S49.** UV-Vis spectra of  $c\text{-A}^2\text{L}_3\text{Cd}_2$  cage during ring-opening process ( $\text{CH}_3\text{CN}/\text{CHCl}_3$ ,  $v:v = 1:1$ ,  $1 \times 10^{-5} \text{ mol L}^{-1}$ , room temperature).

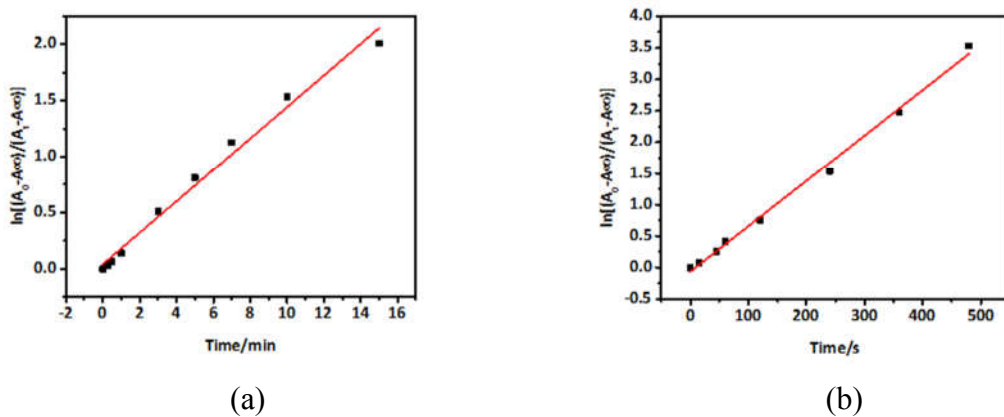

**Figure S50.** (a) Plot of  $\ln[(A_0 - A_\infty)/(A_t - A_\infty)]$  with time for UV-Vis absorption of  $o\text{-A}^2\text{L}_3\text{Cd}_2$  cage during ring-closing process, and (b)  $c\text{-A}^2\text{L}_3\text{Cd}_2$  cage during ring-opening process ( $\text{CH}_3\text{CN}/\text{CHCl}_3$ ,  $v:v = 1:1$ ,  $1 \times 10^{-5} \text{ mol L}^{-1}$ , room temperature).

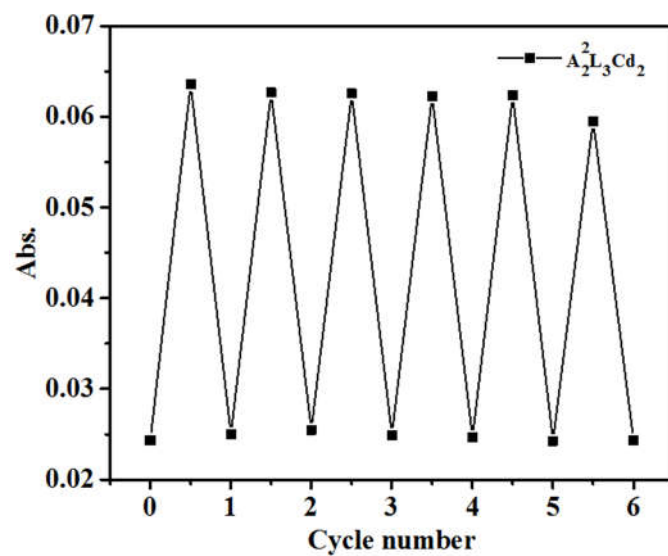

**Figure S51.** Cycled signals for absorbance at 627 nm of  $A_2L_3Cd_2$  cage during alternative ring-closing/ring-opening processes.

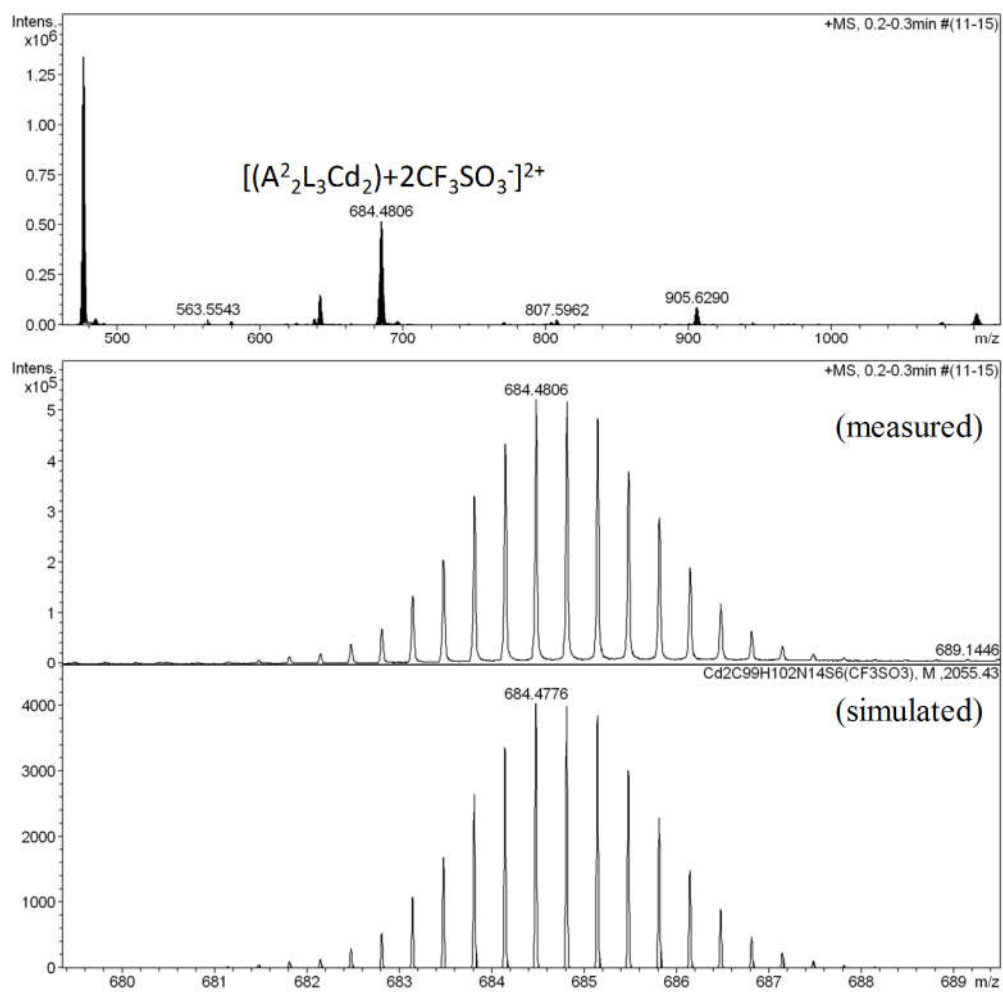

**Figure S52.** High resolution ESI-MS spectra of *c*-A<sup>2</sup>L<sub>3</sub>Cd<sub>2</sub> cage (CH<sub>3</sub>CN, room temperature).

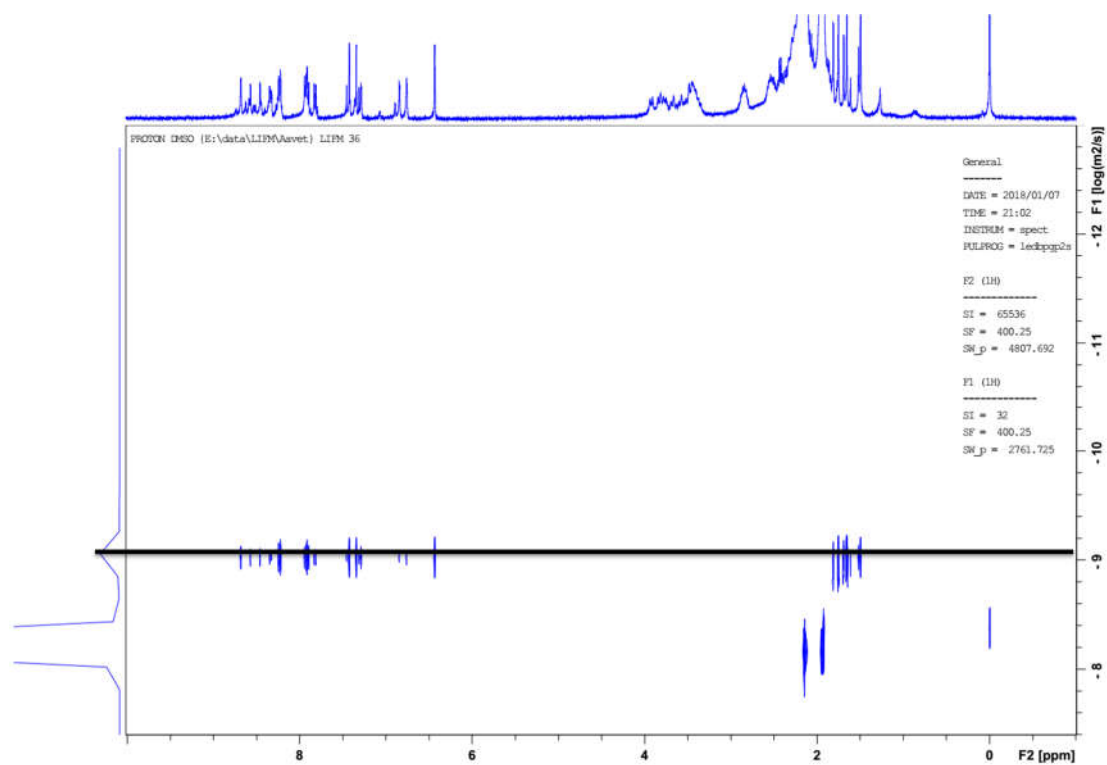

**Figure S53.** DOSY spectra of *c*-A<sup>2</sup>L<sub>3</sub>Cd<sub>2</sub> cage (CD<sub>3</sub>CN, room temperature).

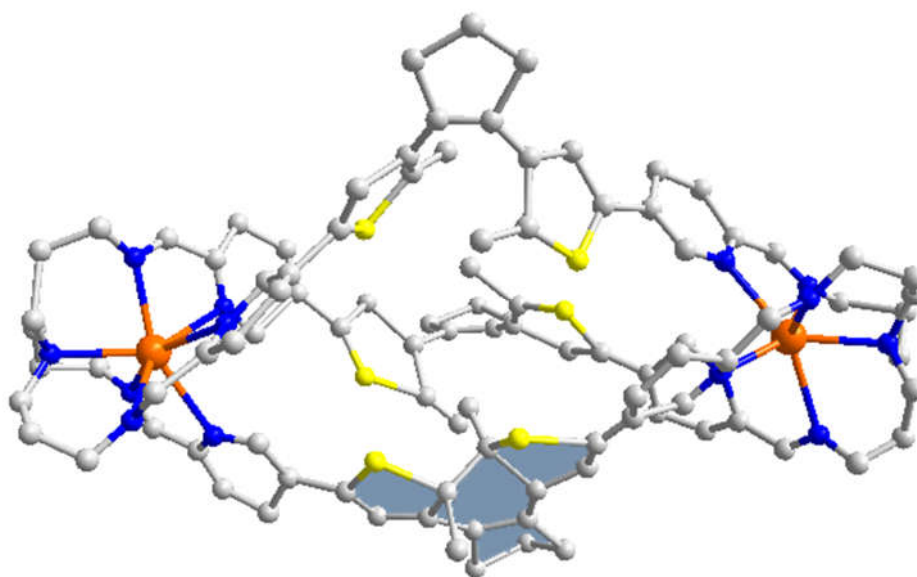

**Figure S54.** Single-crystal structure of *c*-A<sup>2</sup>L<sub>3</sub>Cd<sub>2</sub> cage (grey for C, blue for N, yellow for S, orange for Cd, H atoms, solvents and counter anions are omitted for clarity).

### 3.4 $A^2L_3Zn_2$ cage

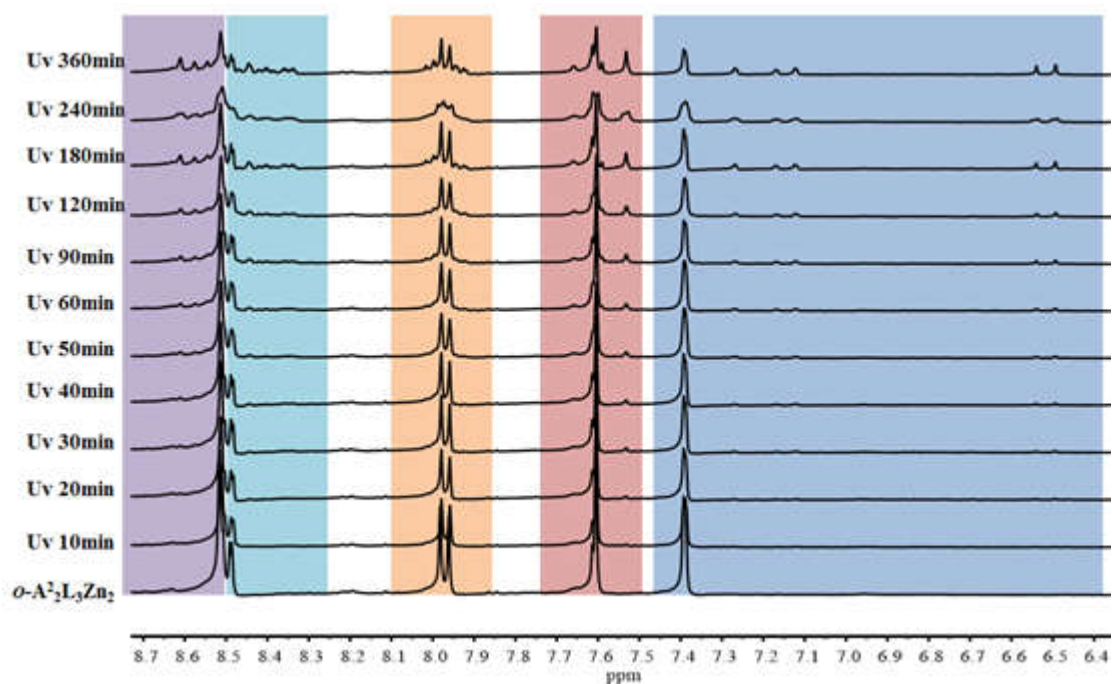

**Figure S55.**  $^1H$  NMR spectra evolution of  $o-A^2L_3Zn_2$  cage under UV irradiation for different time (400 MHz,  $CD_3CN$ , 298 K).

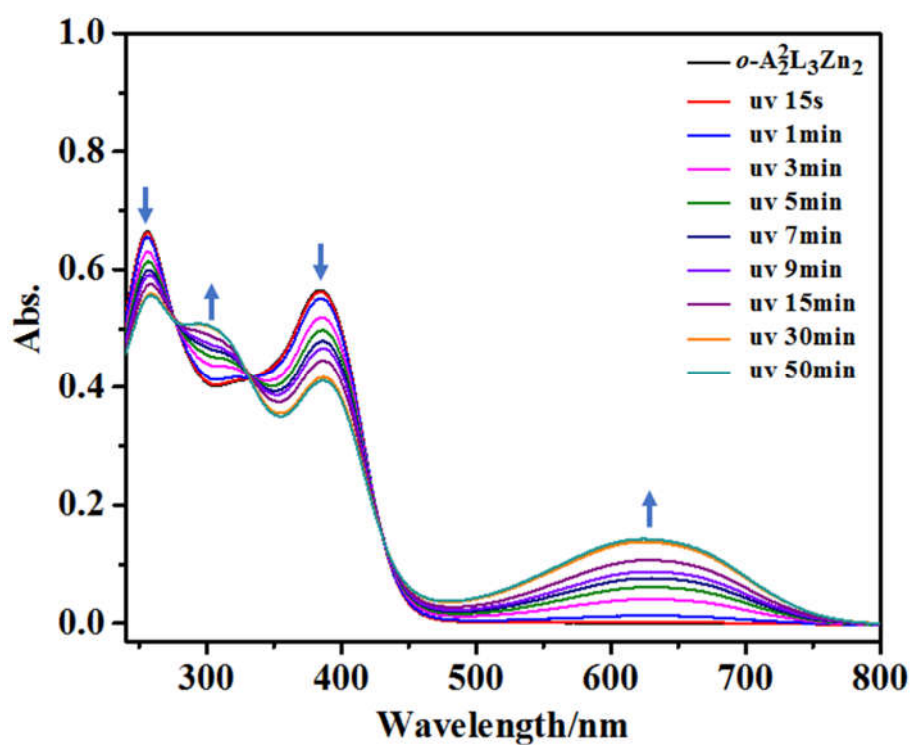

**Figure S56.** UV-Vis spectra of  $o-A^2L_3Zn_2$  cage during ring-closing process ( $CH_3CN/CHCl_3$ , v:v = 1:1,  $1 \times 10^{-5}$  mol  $L^{-1}$ , room temperature).



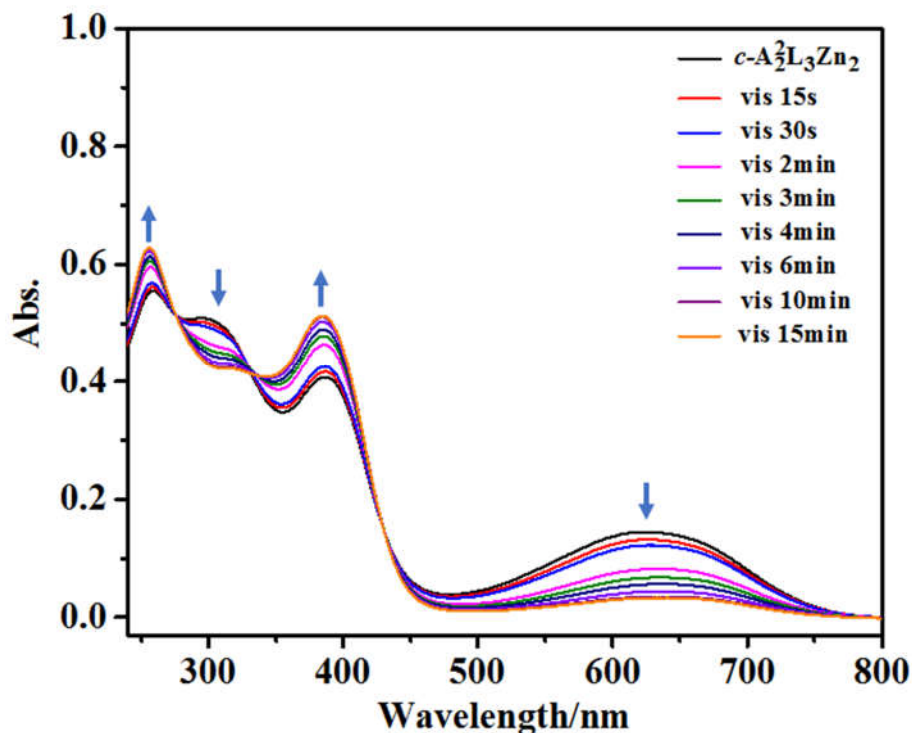

**Figure S57.** UV-Vis spectra of  $c\text{-A}^2\text{L}_3\text{Zn}_2$  cage during ring-opening process ( $\text{CH}_3\text{CN}/\text{CHCl}_3$ ,  $v:v=1:1$ ,  $1 \times 10^{-5} \text{ mol L}^{-1}$ , room temperature).

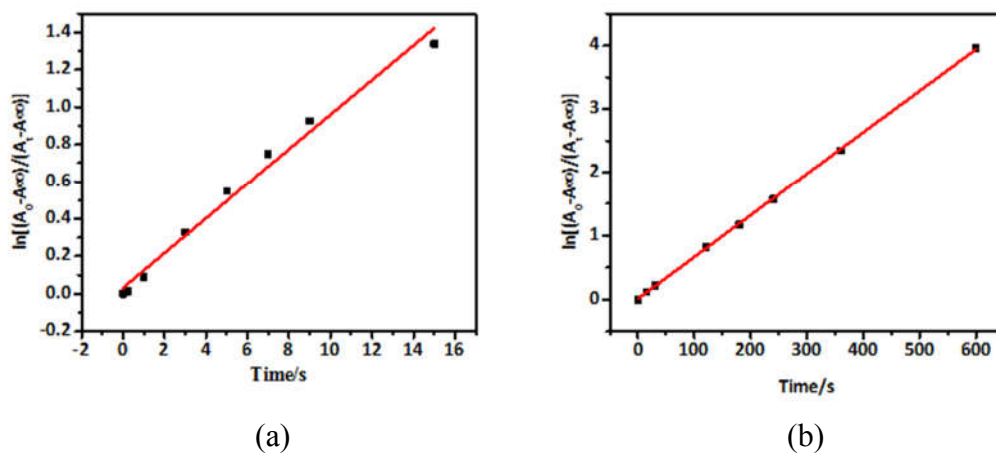

**Figure S58.** (a) Plot of  $\ln[(A_0 - A_\infty)/(A_t - A_\infty)]$  with time for UV-Vis absorption of  $o\text{-A}^2\text{L}_3\text{Zn}_2$  cage during ring-closing process, and (b)  $c\text{-A}^2\text{L}_3\text{Zn}_2$  cage during ring-opening process ( $\text{CH}_3\text{CN}/\text{CHCl}_3$ ,  $v:v = 1:1$ ,  $1 \times 10^{-5} \text{ mol L}^{-1}$ , room temperature).

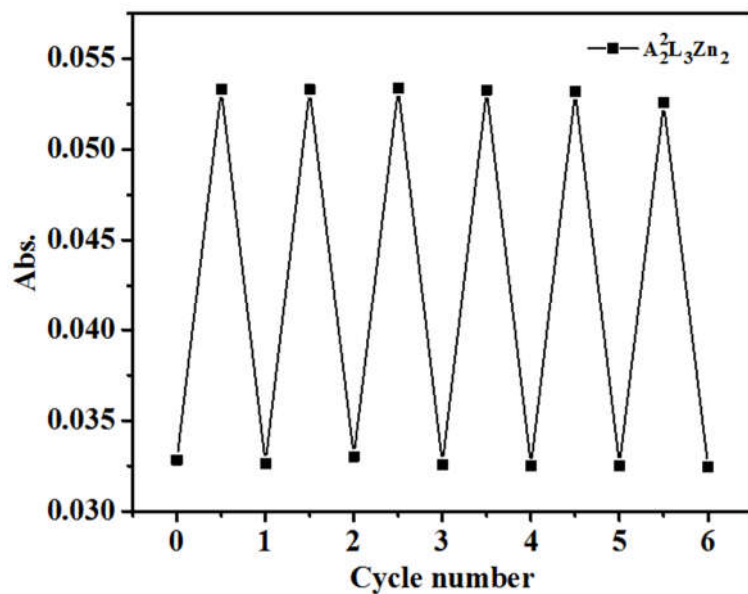

**Figure S59.** Cycled signals for absorbance at 627 nm of  $A_2L_3Zn_2$  during alternative ring-closing/ring-opening processes.

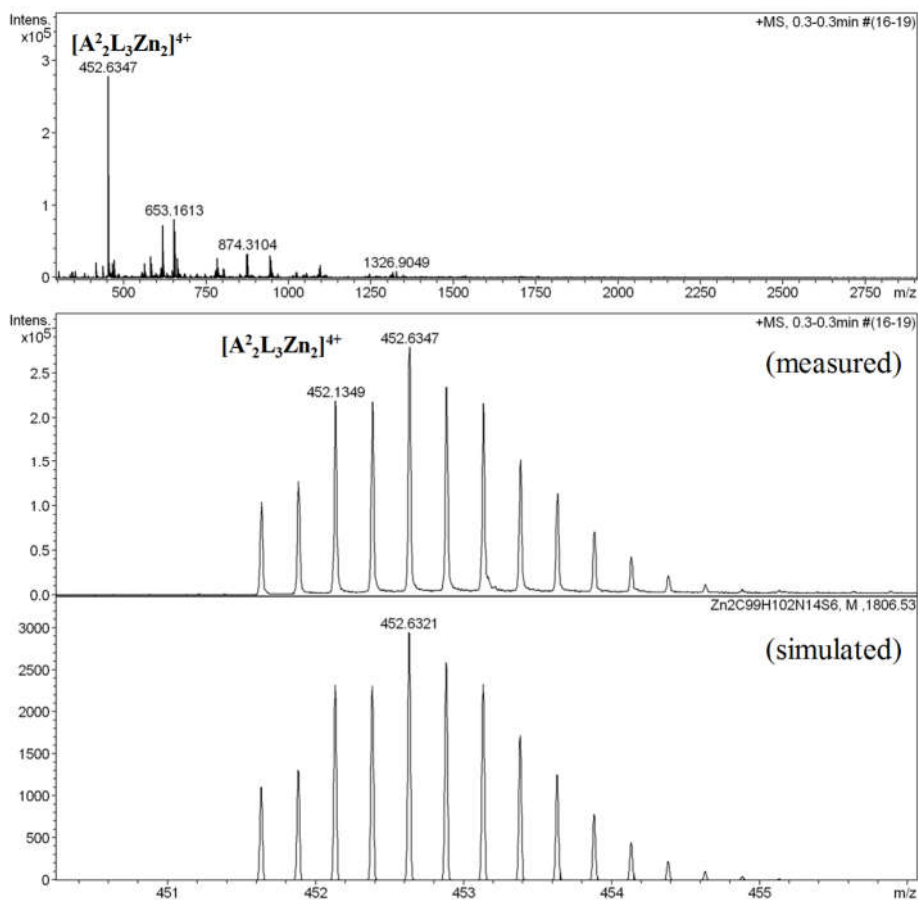

**Figure S60.** High resolution ESI-MS spectra of *c*- $A_2L_3Zn_2$  cage ( $CH_3CN$ , room temperature).

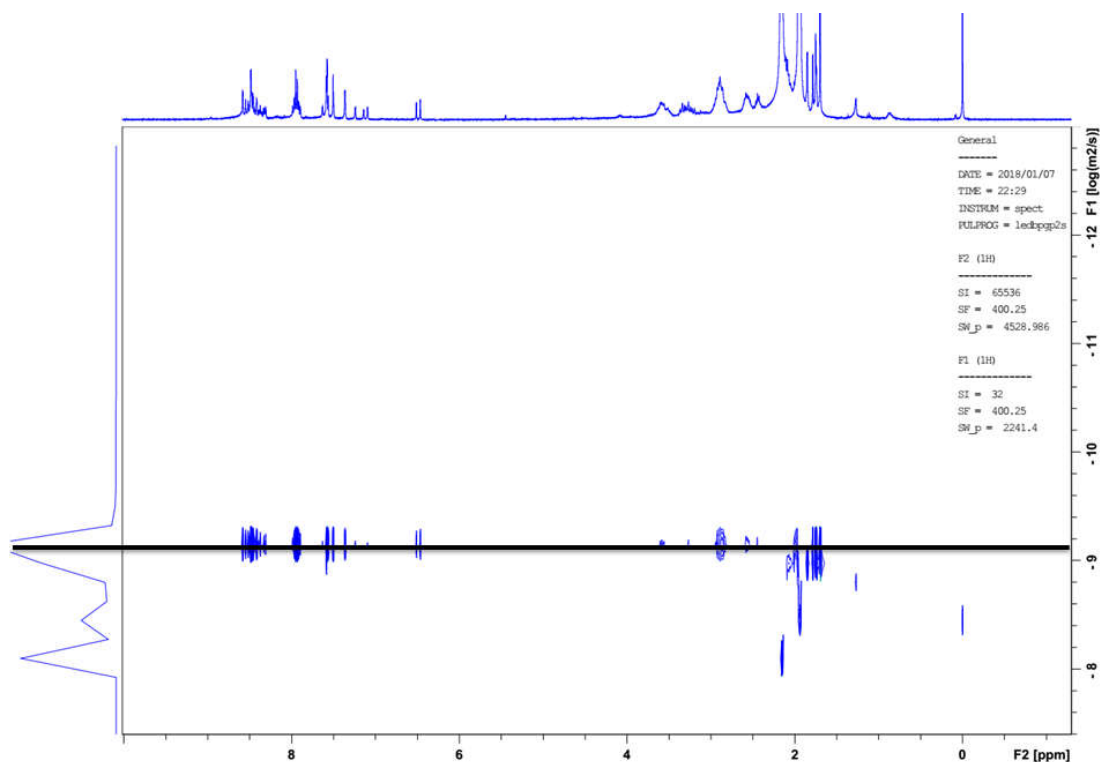

**Figure S61.** DOSY spectra of *c*-A<sup>2</sup>L<sub>3</sub>Zn<sub>2</sub> cage (CD<sub>3</sub>CN, room temperature).

### 3.5 R-A<sup>1</sup>L<sub>3</sub> cage

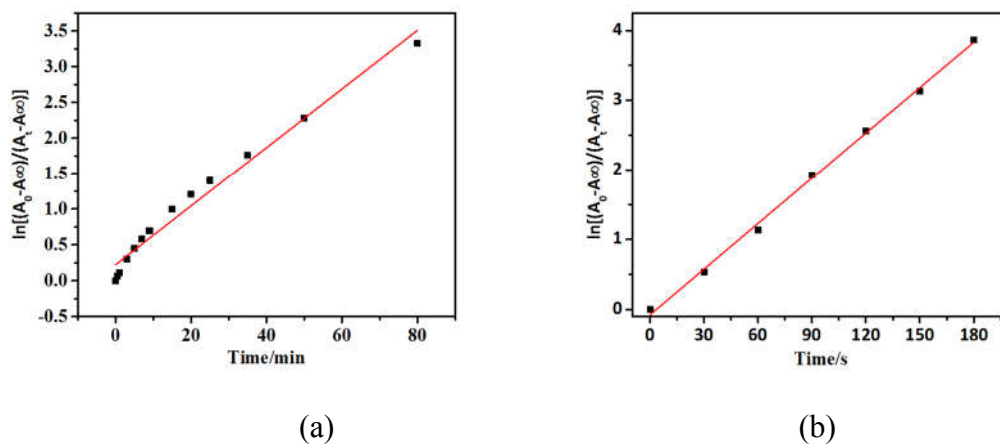

**Figure S62.** (a) Plot of  $\ln[(A_0 - A_\infty)/(A_t - A_\infty)]$  with time for UV-Vis absorption of *o*-R-A<sup>1</sup>L<sub>3</sub> cage during ring-closing process, and (b) *c*-R-A<sup>1</sup>L<sub>3</sub> cage during ring-opening process (CH<sub>3</sub>CN/CHCl<sub>3</sub>, v:v = 1:1,  $1 \times 10^{-5}$  mol L<sup>-1</sup>, room temperature).

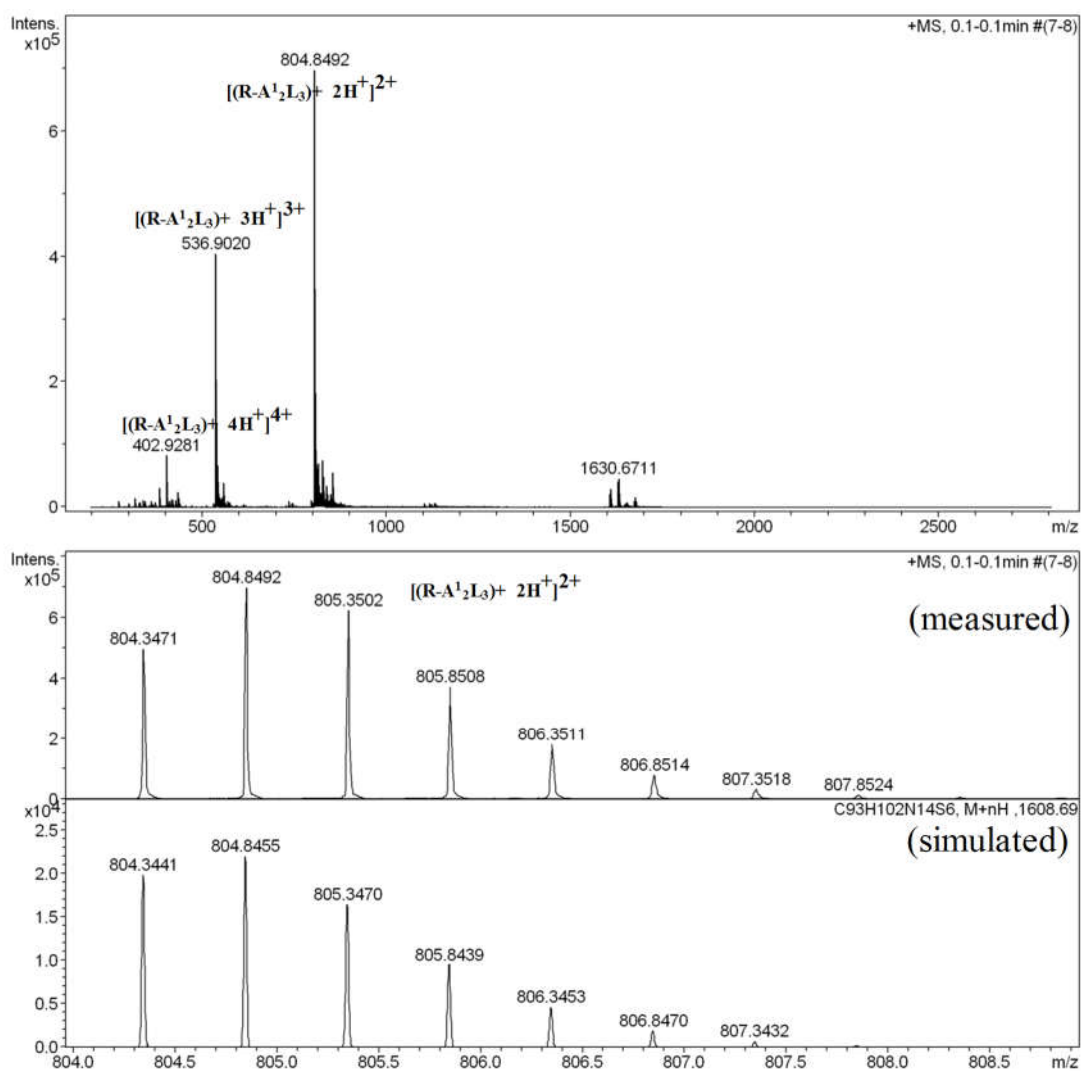

Figure S63. High resolution ESI-MS spectra of  $c\text{-R-A}^1_2\text{L}_3$  cage ( $\text{CH}_3\text{OH}$ , room temperature).

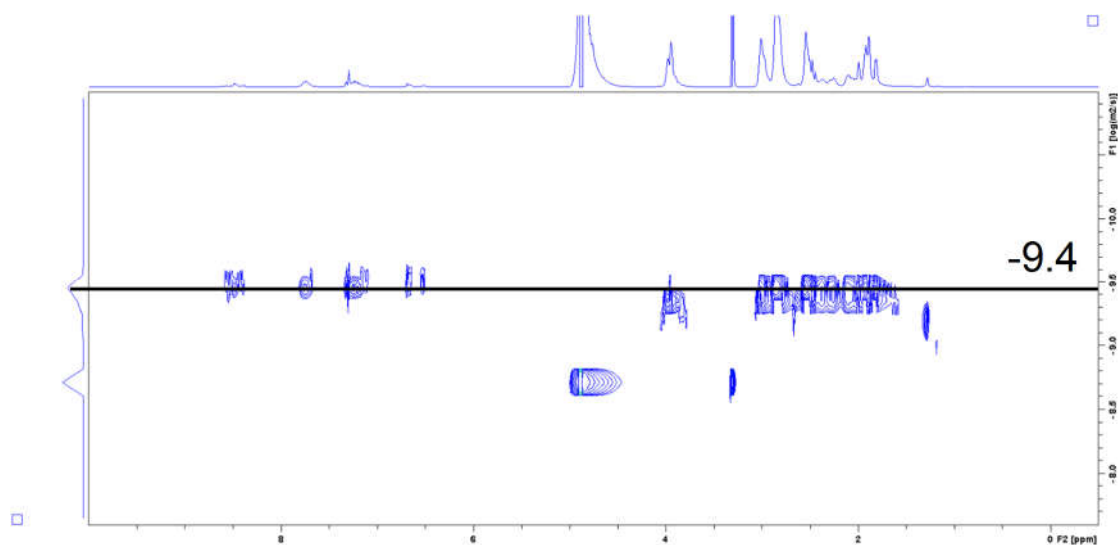

Figure S64. DOSY spectra of  $c\text{-R-A}^1_2\text{L}_3$  cage ( $\text{CD}_3\text{OD}$ , room temperature).

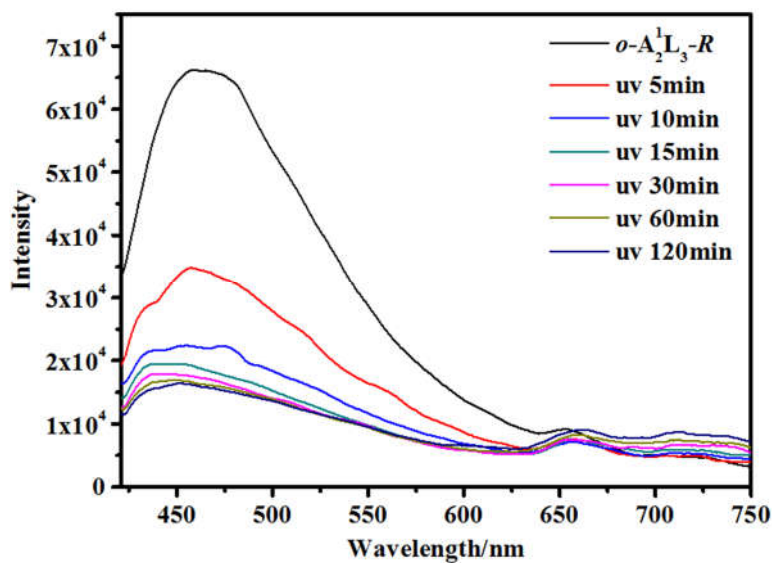

**Figure S65.** The emission spectra of *o*-R-A<sup>1</sup><sub>2</sub>L<sub>3</sub> cage during ring-closing process (CH<sub>3</sub>CN/CHCl<sub>3</sub>, v:v = 1:1, 1×10<sup>-5</sup> mol L<sup>-1</sup>, room temperature).

### 3.6 R-A<sup>2</sup><sub>2</sub>L<sub>3</sub>

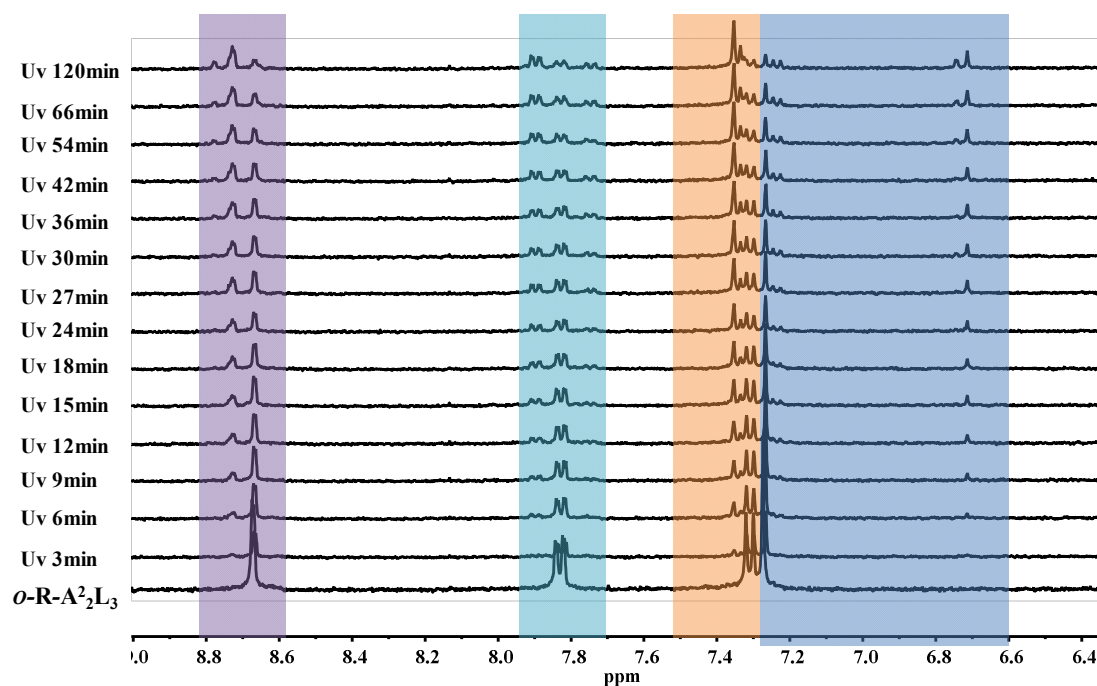

**Figure S66.** <sup>1</sup>H NMR spectra evolution of *o*-R-A<sup>2</sup><sub>2</sub>L<sub>3</sub> cage under UV irradiation for different time (400 MHz, CD<sub>3</sub>OD, 298 K).

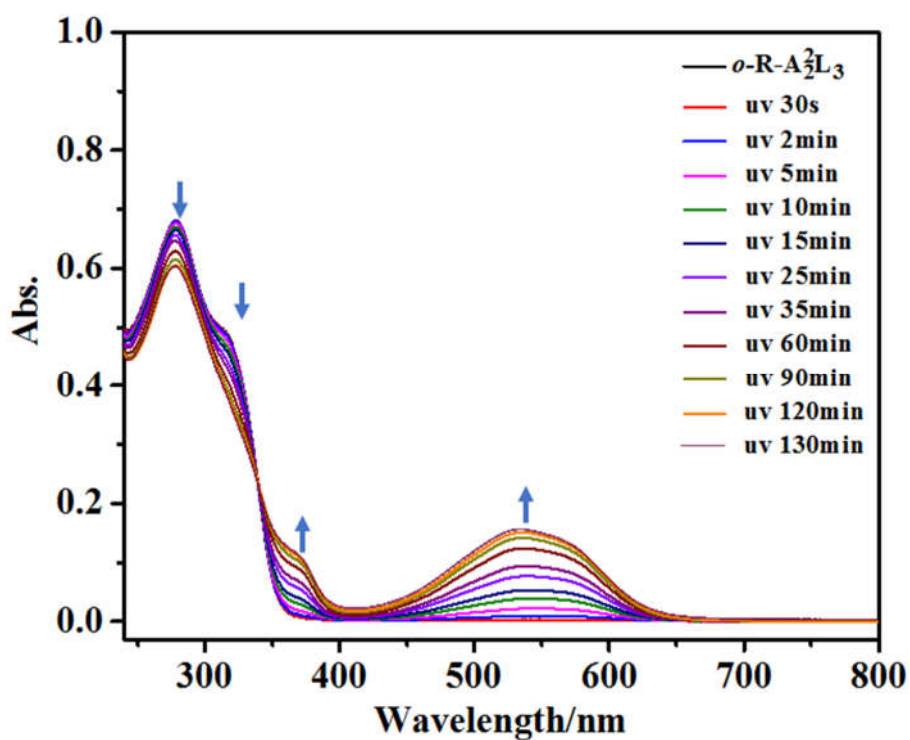

**Figure S67.** UV-Vis spectra of *o*-R-A<sub>2</sub>L<sub>3</sub> cage during ring-closing process (CH<sub>3</sub>CN/CHCl<sub>3</sub>, v:v = 1:1, 1×10<sup>-5</sup> mol L<sup>-1</sup>, room temperature).

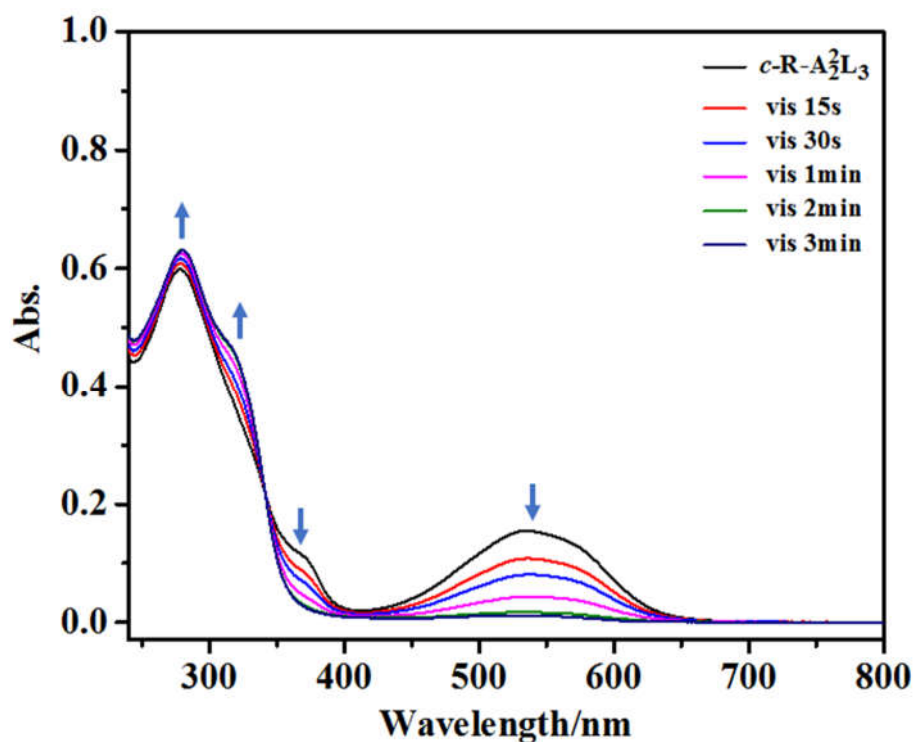

**Figure S68.** UV-Vis spectra of *c*-R-A<sub>2</sub>L<sub>3</sub> cage during ring-opening process (CH<sub>3</sub>CN/CHCl<sub>3</sub>, v:v = 1:1, 1×10<sup>-5</sup> mol L<sup>-1</sup>, room temperature).

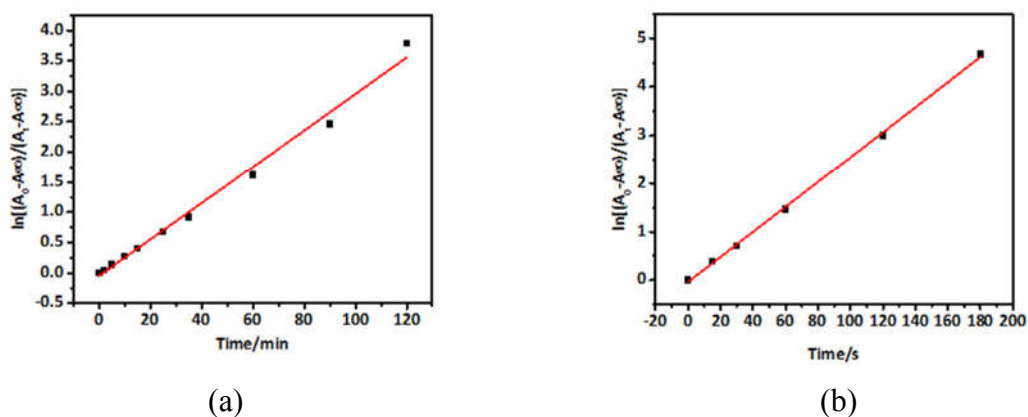

**Figure S69.** (a) Plot of  $\ln[(A_0-A_\infty)/(A_t-A_\infty)]$  with time for UV-Vis absorption of *o*-R-A<sup>2</sup>L<sub>3</sub> cage during ring-closing process, and (b) *c*-R-A<sup>2</sup>L<sub>3</sub> cage during ring-opening process (CH<sub>3</sub>CN/CHCl<sub>3</sub>, v:v = 1:1,  $1 \times 10^{-5}$  mol L<sup>-1</sup>, room temperature).

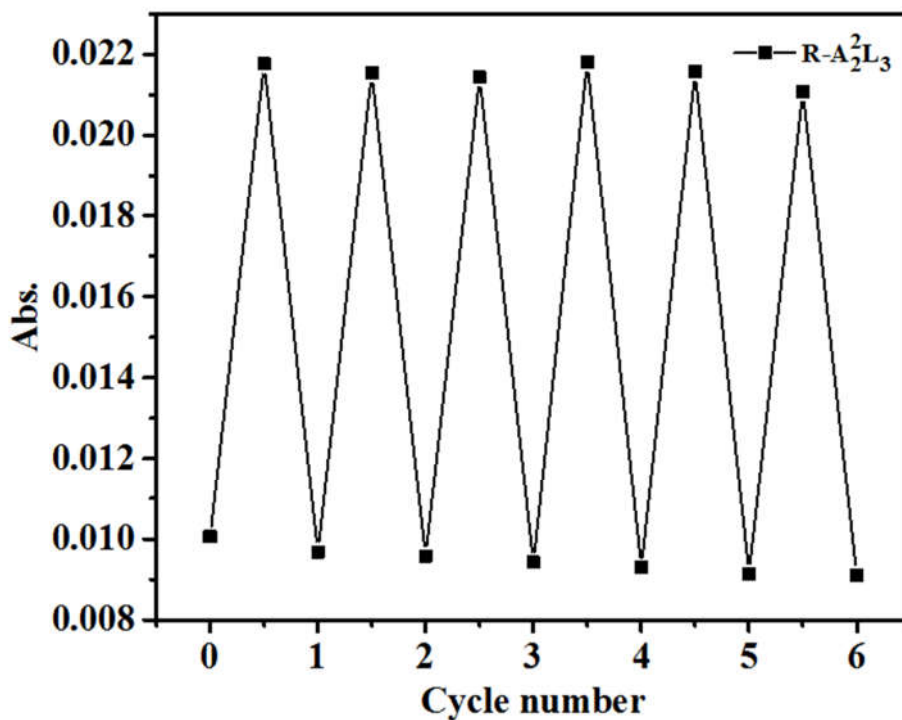

**Figure S70.** Cycled signals for absorbance at 538 nm of R-A<sup>2</sup>L<sub>3</sub> cage during alternative ring-closing/ring-opening processes.

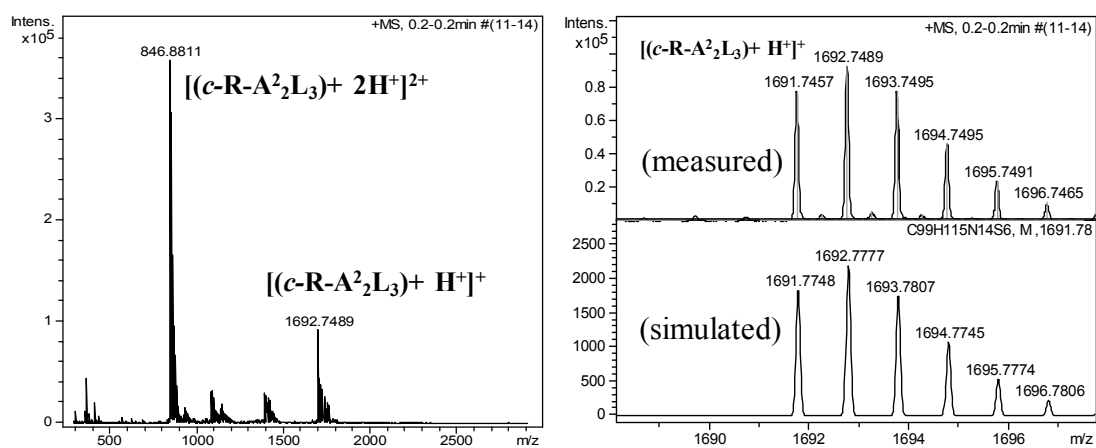

**Figure S71.** High resolution ESI-MS spectra of *c*-R-A<sup>2</sup>L<sub>3</sub> cage (CH<sub>3</sub>OH, room temperature).

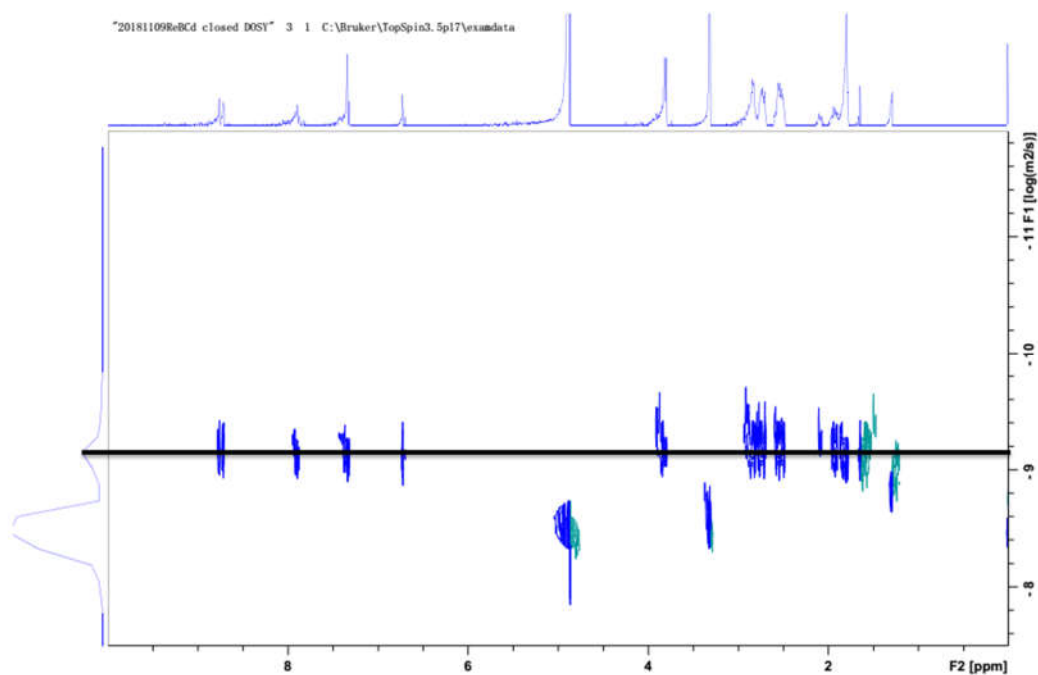

**Figure S72.** DOSY spectra of *c*-R-A<sup>2</sup>L<sub>3</sub> cage (CD<sub>3</sub>OD, room temperature).



### 3.7 Guest effects

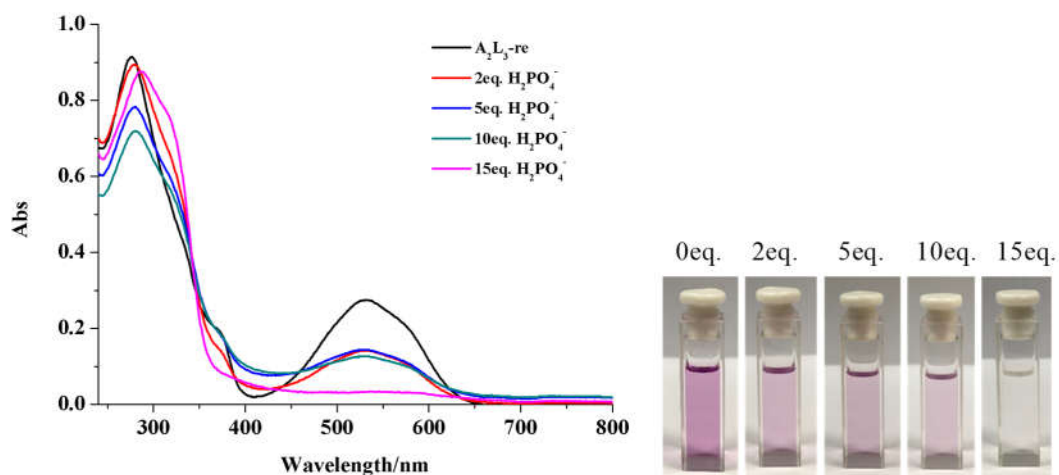

**Figure S73.** UV-Vis spectra (left) and solution color (right) after adding different amounts of  $\text{H}_2\text{PO}_4^-$  anions into  $o\text{-R-A}_2\text{L}_3$  solution ( $\text{CH}_2\text{Cl}_2$ ,  $1 \times 10^{-5} \text{ mol L}^{-1}$ ), and then irradiated under UV light for 90 min.

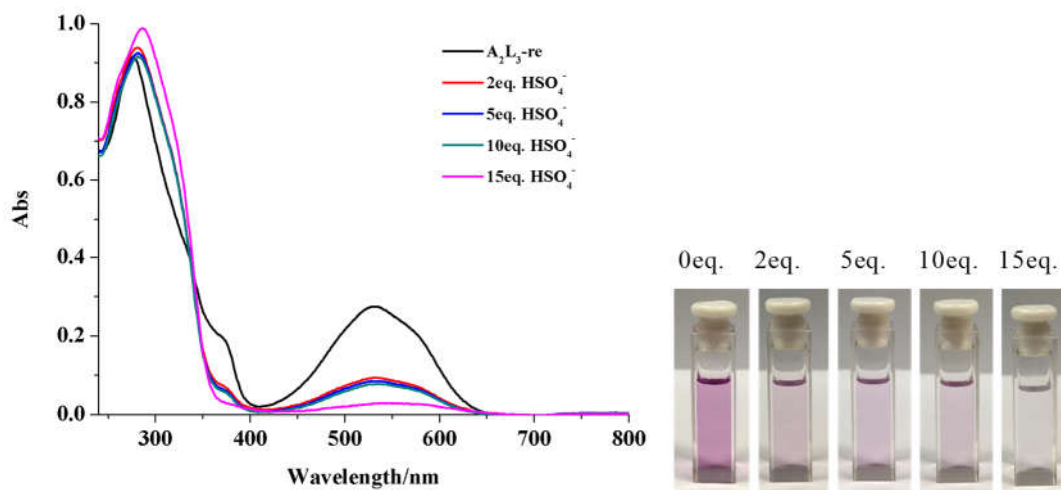

**Figure S74.** UV-Vis spectra (left) and solution color (right) after adding different amounts of  $\text{HSO}_4^-$  anions into  $o\text{-R-A}_2\text{L}_3$  solution ( $\text{CH}_2\text{Cl}_2$ ,  $1 \times 10^{-5} \text{ mol L}^{-1}$ ), and then irradiated under UV light for 90 min.

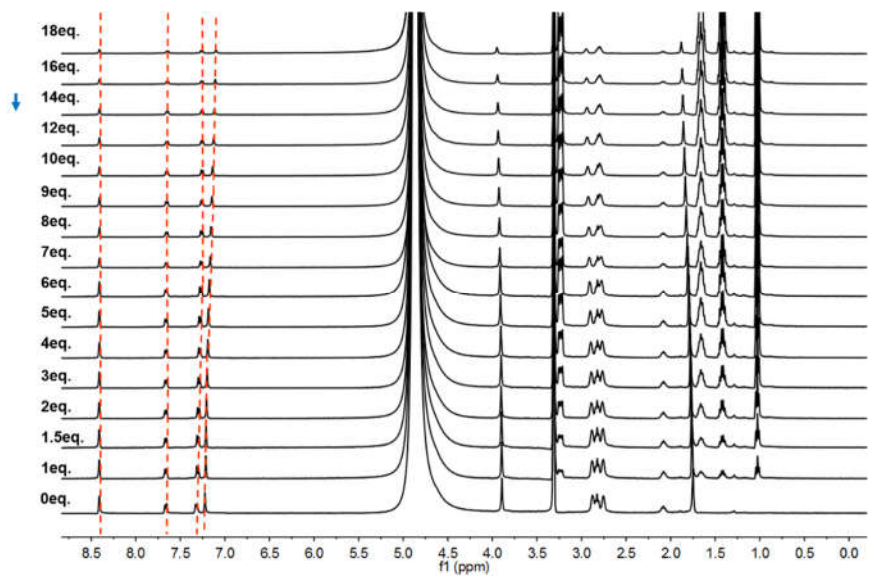

Figure S75.  $^1\text{H}$  NMR titration spectra of  $\text{H}_2\text{PO}_4^-$  into  $o\text{-R-A}^1_2\text{L}_3$  solution ( $\text{CD}_3\text{OD}$ ,  $25^\circ\text{C}$ ).

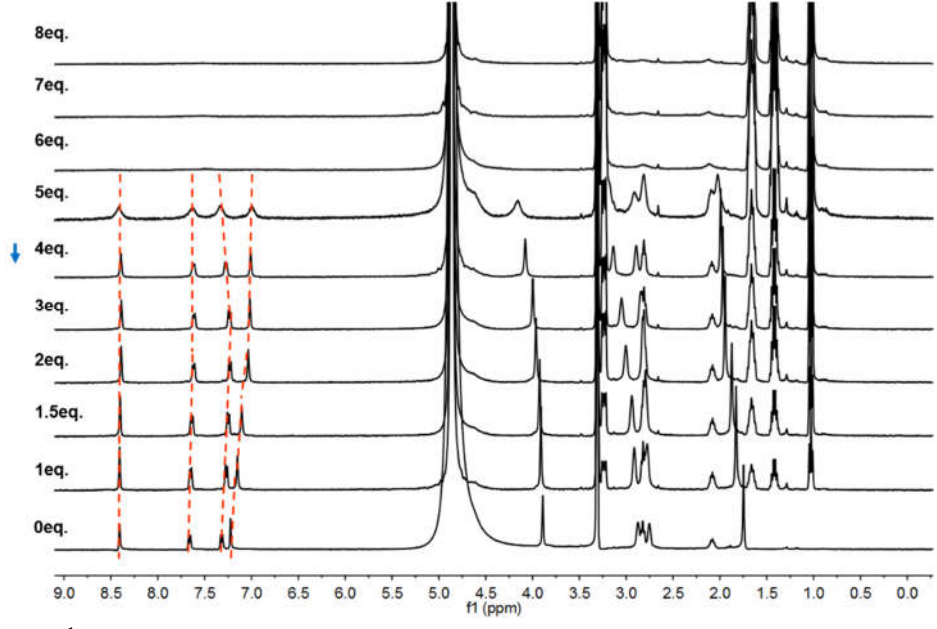

Figure S76.  $^1\text{H}$  NMR titration spectra of  $\text{HSO}_4^-$  into  $o\text{-R-A}^1_2\text{L}_3$  solution ( $\text{CD}_3\text{OD}$ ,  $25^\circ\text{C}$ ).

#### 4. Up-conversion color tuning applications

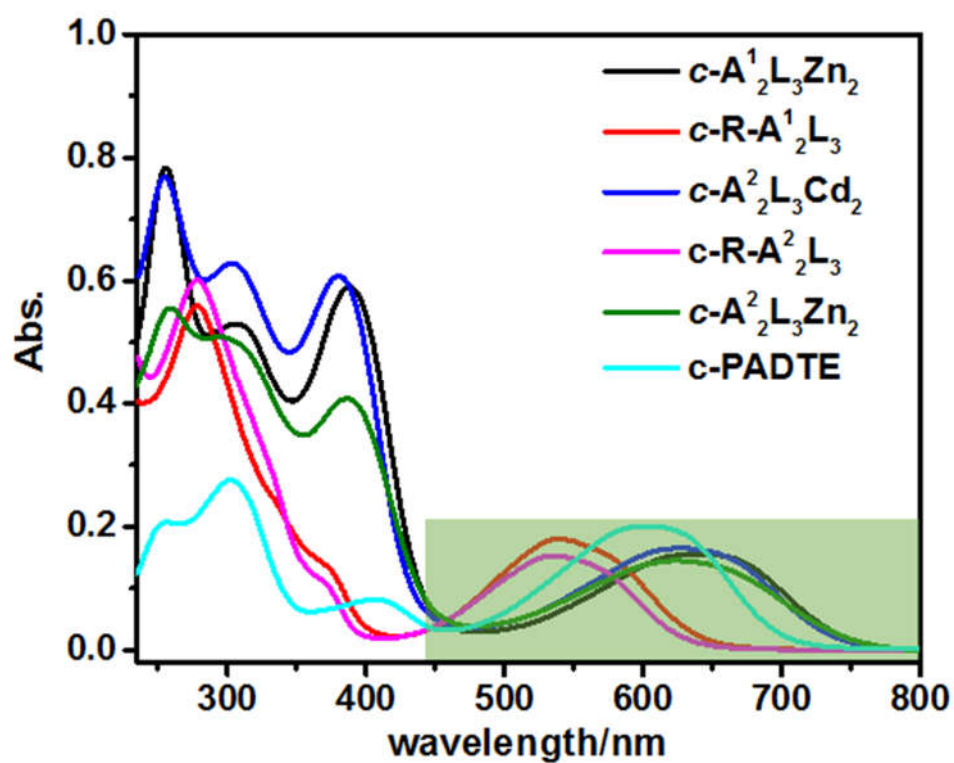

Figure S77. The UV-Vis spectra of  $c$ -PADTE and  $c$ -cages.

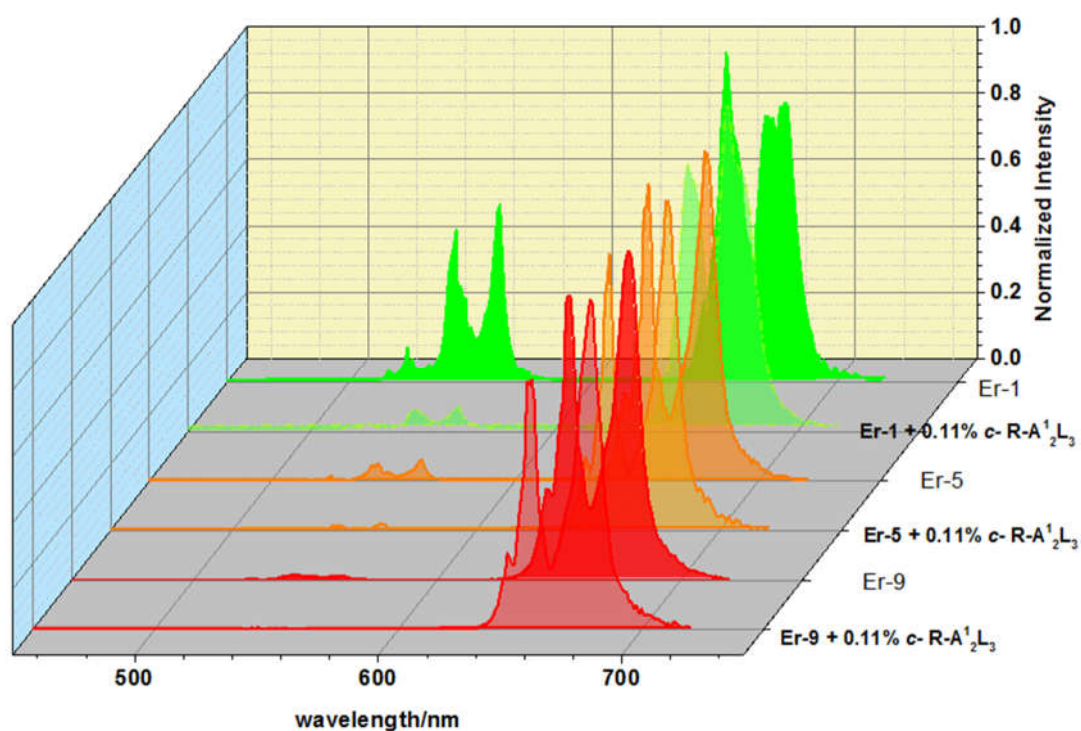

Figure S78. The upconversion luminescence spectra of three kinds of upconversion materials (Er-1, Er-5, Er-9) and their hybrid materials with  $c-R-A^1_2L_3$  cage.

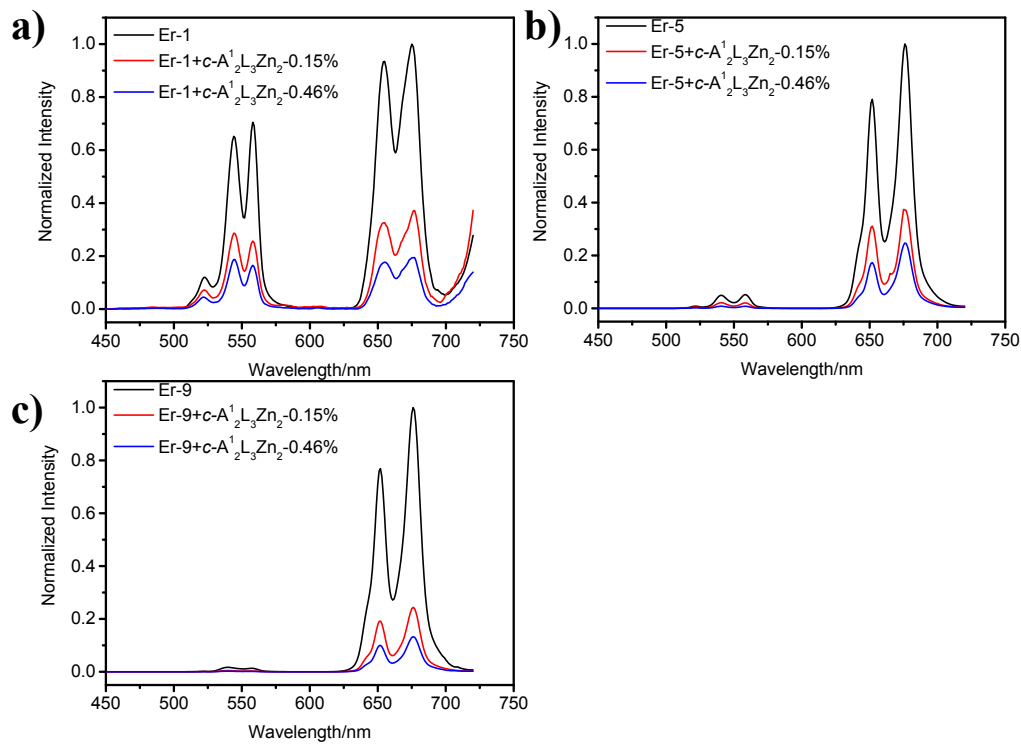

**Figure S79.** The upconversion emission spectra of nine kinds of hybrid materials.

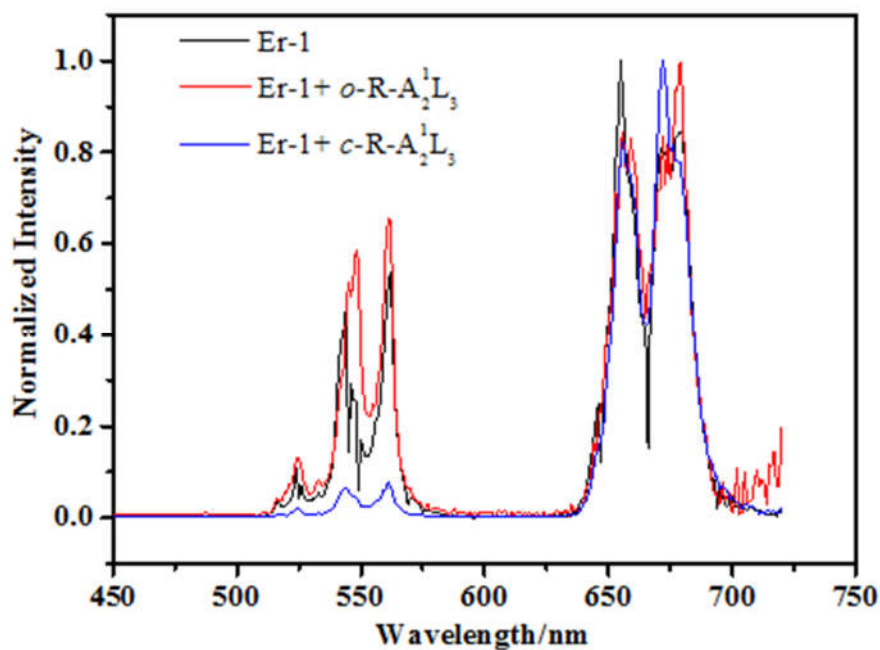

**Figure S80.** The upconversion emission spectra of Er-1 and its hybrid materials (Er-1 + *o/c*-R- $A_{1/2}L_3$ ).

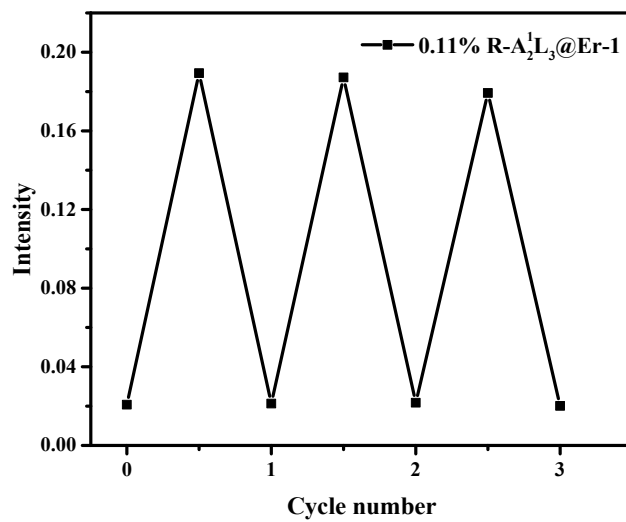

**Figure S81.** Cycled signals for upconversion PL intensity at 544 nm of 0.11% R-A<sub>2</sub>L<sub>3</sub> @ Er-1 hybrid solid state materials during alternative ring-closing/ring-opening processes.

## REFERENCES

- S1 E. S. Tam, J. J. Parks, W. W. Shum, Y.-W. Zhong, M. E. B. Santiago-Berrios, X. Zheng, W. Yang, G. K.-L. Chan, H. D. Abruna, D. C. Ralph, *ACS Nano*, 2011, **5**, 5115-5123.
- S2 S.-Y. Yin, L. Chen, M. Pan, Z. Wang, L.-Y. Zhang, H.-P. Wang, Y.-N. Fan, C.-Y. Su, *ChemistrySelect*, 2016, **1**, 3136-3143.
